# Supplementary material for: Carbene-catalyzed selective addition of isothioureas to enals for access to sulphur-containing 5,6-dihyropyrimidin-4-ones
Source: Royal Society of Chemistry journal article supplement (doi:10.1039/d0qo01380c), 2020-12-11
Supplement: d0qo01380c1.pdf [file d0qo01380c1.pdf]

# Carbene-Catalyzed Selective Addition of Isothioureas to Enals for Access to Sulphur-Containing 5,6-Dihydropyrimidin-4-ones

Rakesh Maiti,<sup>a</sup> Jun Xu,<sup>a,b</sup> Jia-Lei Yan,<sup>a</sup> Bivas Mondal,<sup>a</sup> Xing Yang,<sup>a</sup> Huifang Chai,<sup>\*b</sup> Lin Hao,<sup>a</sup> Zhichao Jin,<sup>c</sup> and Yonggui Robin Chi<sup>\*a, c</sup>

<sup>a</sup>Division of Chemistry & Biological Chemistry, School of Physical & Mathematical Science, Nanyang Technological University, Singapore 637371, Singapore

<sup>b</sup>Guizhou University of Traditional Chinese Medicine, Guiyang 550025, China

<sup>c</sup>Key Laboratory of Green Pesticide and Agriculture Bioengineering, Ministry of Education, Guizhou University, Huaxi District, Guiyang 550025, China

## Table of Contents

|                                                                                                                              |     |
|------------------------------------------------------------------------------------------------------------------------------|-----|
| Part 1. General Information.....                                                                                             | S3  |
| Part 2. Experimental Section                                                                                                 |     |
| I. General Procedure to Synthesis of Starting Materials.....                                                                 | S4  |
| II. General Procedure for the Catalytic Reaction of Enal (1) with S-alkylated isothiourea (2) to Synthesize Product (3)..... | S5  |
| III. Additional Results of Condition Optimization (NHC, Base & solvent).....                                                 | S6  |
| IV. Stereochemistry Determination of 3a via X-ray Crystallographic Analysis.....                                             | S7  |
| V. Postulated Reaction Mechanism.....                                                                                        | S8  |
| VI. Procedures for Scale-up Reaction and Synthetic Transformations.....                                                      | S9  |
| VII. References.....                                                                                                         | S10 |
| Part 3. Characterizations of Products                                                                                        |     |
| I. Characterization of Products.....                                                                                         | S11 |
| II. <sup>1</sup> H, <sup>13</sup> C NMR and HPLC Spectra.....                                                                | S23 |

## Part 1. General Information

Commercially available materials purchased from TCI or Sigma Aldrich were used as received. All reactions were carried out under nitrogen atmosphere under anhydrous conditions unless otherwise noted. THF was distilled from sodium-benzophenone. Flash chromatography was performed using silica gel (200-300 mesh). Reactions were monitored by thin layer chromatography (TLC). Visualization was achieved under a UV lamp (254nm and 365 nm).  $^1\text{H}$  and  $^{13}\text{C}$  NMR were recorded on Bruker BBFO 400 MHz NMR, Bruker AV400 MHz NMR spectrometer with TMS as the internal standard, and were calibrated using residual undeuterated solvent as an internal reference (CDCl<sub>3</sub>:  $^1\text{H}$  NMR = 7.26,  $^{13}\text{C}$  NMR = 77.16). The following abbreviations were used to explain the multiplicities: s = singlet, d = doublet, t = triplet, q = quartet, m = multiplet, br = broad. Coupling constants (J) are reported in Hertz (Hz). High-resolution Mass spectra (HRMS) were recorded by using Finnigan MAT 95 XP mass spectrometer (Thermo Electron Corporation). The determination of e.r. was performed via chiral HPLC analysis using Shimadzu LC-20AD HPLC workstation. Optical rotations were measured using a 1 mL cell with a 1 dm path length on a Jasco P-1030 polarimeter and are reported as follows:  $[\alpha]^{21}_{\text{D}}$  (c in g per 100 mL solvent).

## Part 2. Experimental Section

### I. General Procedure to Synthesis of Starting Materials:

#### S-Methyl Isothiourea:<sup>1</sup>

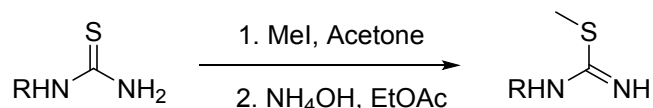

Iodomethane (5 mmol) was added to a solution of thiourea derivative (5 mmol) in acetone and the mixture was continued to stir overnight at room temperature. After that, the mixture was concentrated under vacuum and ethyl acetate (25 mL) was added. Later, H<sub>2</sub>O (50 mL) was added and cooled to 0 °C. Next, conc. NH<sub>4</sub>OH was mixed dropwise until all the solid disappeared and then, stirred for another 30 mins. Organic layer was separated, washed with brine, and concentrated. The product was used directly without further purification.

#### Synthesis of 2h:<sup>2</sup>

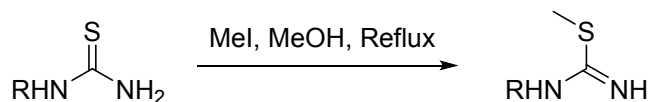

In 100 mL round bottom flask equipped with a magnetic stirring bar and a reflux condenser, thiourea (4.00 g, 51.3 mmol) was dissolved in methanol (40.0 mL). Then, Iodomethane (3.20 mL, 51.3 mmol) was added in one portion and the mixture was continued to reflux for 2 hrs. After the mentioned time, the reaction mixture was cooled to room temperature and concentrated under reduced pressure, giving a yellowish solid. Then, the yellowish solid was mixed with EtOAc (50.0 mL), and the precipitate that did not dissolve was filtered. The precipitate was sequentially washed several times with EtOAc and diethyl ether until it becomes completely colorless. The product was dried under vacuum to provide 8.35 g (38.0 mmol, 74% yield) of white powder.

#### Synthesis of 2i and 2j:

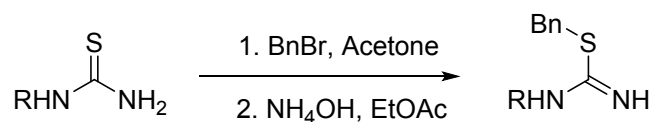

Benzyl Bromide (5 mmol) was added dropwise to a cooled solution of thiourea derivative (5 mmol) in acetone and the mixture was continued to stir overnight at room temperature. After that, the mixture was concentrated under vacuum and ethyl acetate (25 mL) was added. Later, H<sub>2</sub>O (50 mL) was added and cooled to 0 °C. Next, conc. NH<sub>4</sub>OH was mixed dropwise until all the solid disappeared and then, stirred for another 30 mins. Organic layer was separated, washed with brine, and concentrated. The product was used directly without further purification.

## II. General Procedure for the Catalytic Reactions of Enal (1) with S-alkylated isothioura (2) to Synthesize Product 3

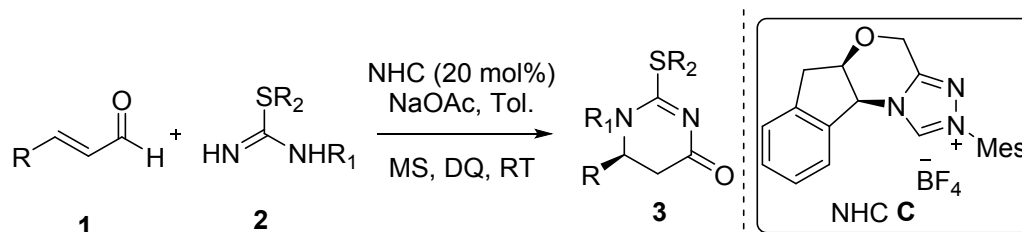

A dry 10 mL Schlenk tube with a stir bar was charged with enal **1** (0.18 mmol, 1.8 equiv.), **2** (0.1 mmol, 1.0 equiv.), NHC (8.4 mg, 20 mol%), NaOAc (13 mg, 0.15 mmol, 1.5 equiv.), AcOH (1.8  $\mu$ L, 30 mol%), DQ (51 mg, 0.125 mmol, 1.25 equiv.) and molecular sieves (100 mg). The tube was evacuated and refilled with nitrogen. Then the mixture was dissolved with the newly distilled solvent toluene (2.0 mL). Then the mixture was stirred at room temperature for 36-48h. When the substrate was consumed completely (monitored by TLC), the mixture was concentrated under vacuum and purified by column chromatography on silica gel (hexane/ethyl acetate = 2:1) to afford the desired product **3**, which was confirmed by <sup>1</sup>H NMR, <sup>13</sup>C NMR spectra, and the enantiomeric ratio was determined by chiral HPLC.

Note: Racemic samples were prepared using NHC below for chiral phase HPLC analysis.

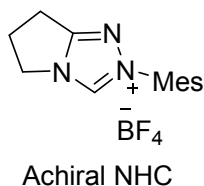

### III. Additional Results of Condition Optimization

Condition Optimization (additional results) of the Model Reaction (reaction of **1a** and **2a**) (Tables S1-S2).

Table S1. NHC Catalysts Screening <sup>a, b</sup>

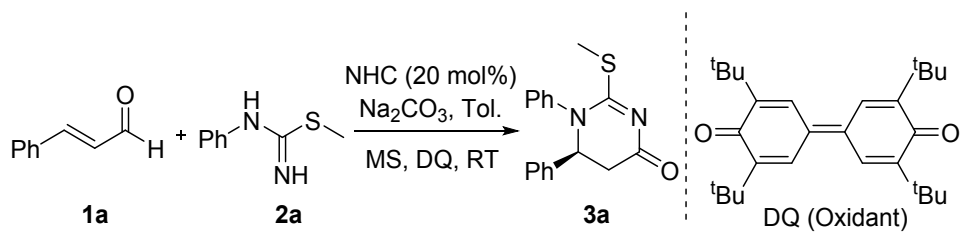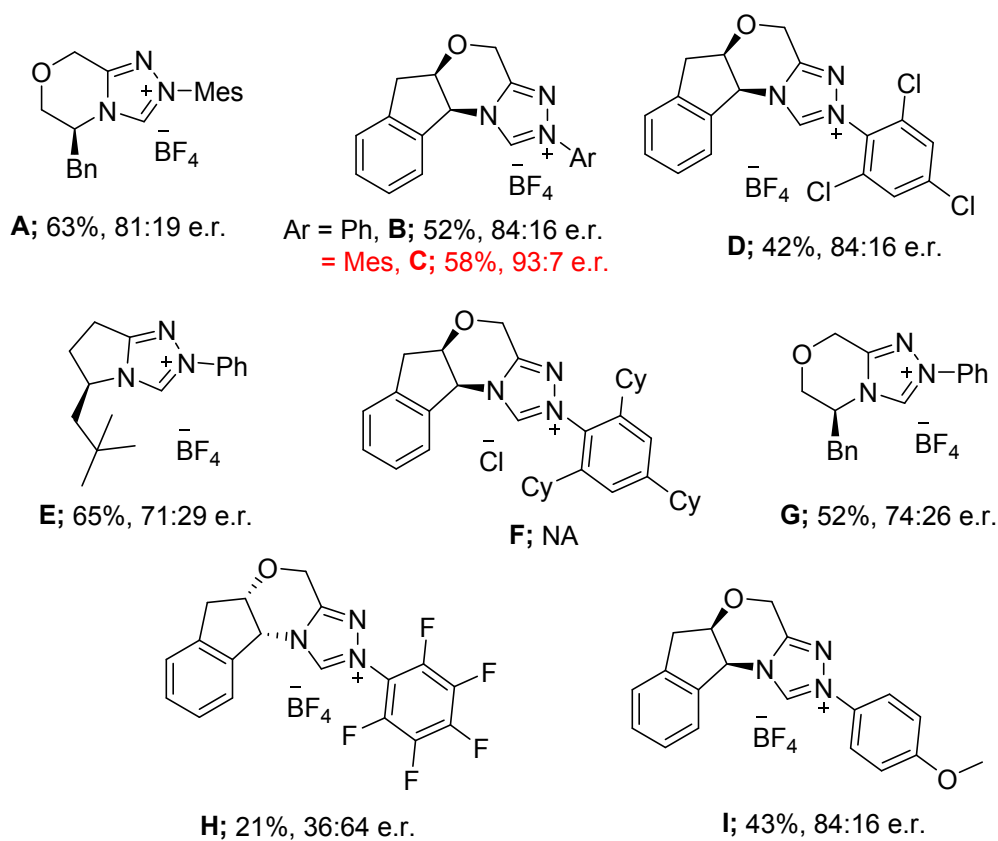

<sup>a</sup>Reaction condition: **1a** (0.09 mmol.), **2a** (0.05 mmol), NHC pre-cat. (20 mol%), Na<sub>2</sub>CO<sub>3</sub> (1.5 equiv.), DQ (1.25 equiv.), AcOH (30 mol%, additive), Tol. (1 mL), MS (50 mg) at RT for 36-48 hrs. <sup>b</sup>Yield determined by <sup>1</sup>HNMR, based on **2a**, by using 1,3,5-trimethoxybenzene as internal standard. The e.r. was determined via chiral-phase HPLC analysis.

**Table S2. Bases, Solvents, and amount of cat. Loading Screening <sup>a, b</sup>**

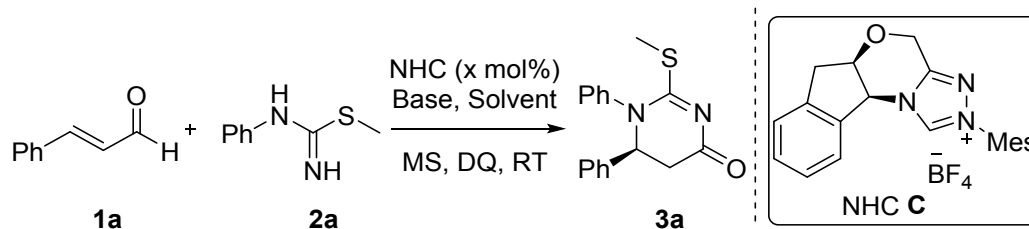

| Entry | NHC (mol%)    | Base                            | Solvent           | Yield (%) | e.r.  |
|-------|---------------|---------------------------------|-------------------|-----------|-------|
| 1     | <b>C (20)</b> | Na <sub>2</sub> CO <sub>3</sub> | THF               | 50        | 83:17 |
| 2     | <b>C (20)</b> | Na <sub>2</sub> CO <sub>3</sub> | ACN               | 63        | 68:32 |
| 3     | <b>C (20)</b> | Na <sub>2</sub> CO <sub>3</sub> | DCE               | 73        | 70:30 |
| 4     | <b>C (20)</b> | Na <sub>2</sub> CO <sub>3</sub> | EtOAc             | 72        | 83:17 |
| 5     | <b>C (20)</b> | Na <sub>2</sub> CO <sub>3</sub> | CHCl <sub>3</sub> | 31        | 87:13 |
| 6     | <b>C (20)</b> | Na <sub>2</sub> CO <sub>3</sub> | Et <sub>2</sub> O | 77        | 86:14 |
| 7     | <b>C (20)</b> | K <sub>2</sub> CO <sub>3</sub>  | Tol.              | 49        | 92:8  |
| 8     | <b>C (20)</b> | Cs <sub>2</sub> CO <sub>3</sub> | Tol.              | 55        | 91:9  |
| 9     | <b>C (20)</b> | K <sub>3</sub> PO <sub>4</sub>  | Tol.              | 61        | 91:9  |
| 10    | <b>C (20)</b> | DABCO                           | Tol.              | 25        | 87:13 |
| 11    | <b>C (20)</b> | DMAP                            | Tol.              | 45        | 92:8  |
| 12    | <b>C (20)</b> | DIPEA                           | Tol.              | 36        | 92:8  |
| 13    | <b>C (20)</b> | NaOAc                           | Tol.              | 82        | 95:5  |
| 14    | <b>C (10)</b> | NaOAc                           | Tol.              | 77        | 93:7  |
| 15    | <b>C (5)</b>  | NaOAc                           | Tol.              | 75        | 91:9  |

<sup>a</sup>Reaction condition: **1a** (0.09 mmol.), **2a** (0.05 mmol), NHC pre-cat. (mol%), Base (1.5 equiv.), DQ (1.25 equiv.), AcOH (30 mol%, additive), Solvent (1 mL), MS (50 mg) at RT for 36-48 hrs. <sup>b</sup>Yield determined by <sup>1</sup>HNMR, based on **2a**, by using 1,3,5-trimethoxybenzene as internal standard. The e.r. was determined via chiral-phase HPLC analysis.

#### IV. Stereochemistry Determination of 3a via X-ray Crystallographic Analysis

Product **3a** was crystallized as a colourless crystal via vaporization of a hexane/CH<sub>2</sub>Cl<sub>2</sub> solution, and its absolute configuration was determined by x-ray structure analysis. **CCDC 2025922** contains the supplementary crystallographic data that can be obtained free of charge from The Cambridge Crystallographic Data Centre via [www.ccdc.cam.ac.uk/data\\_request/cif](http://www.ccdc.cam.ac.uk/data_request/cif).

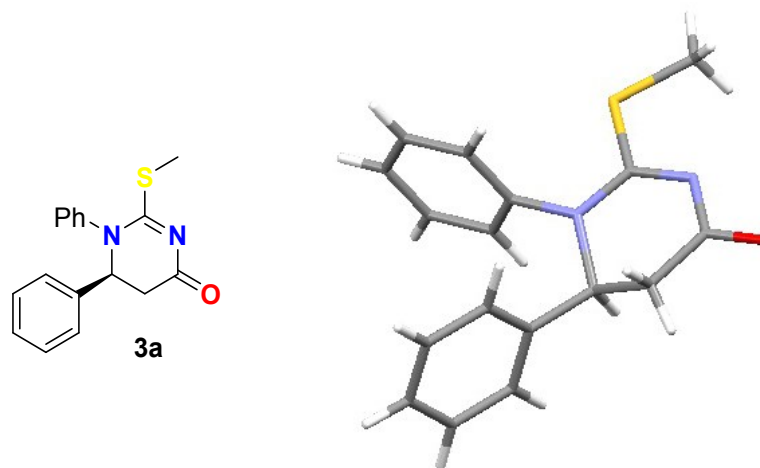

## V. Postulated Reaction Mechanism

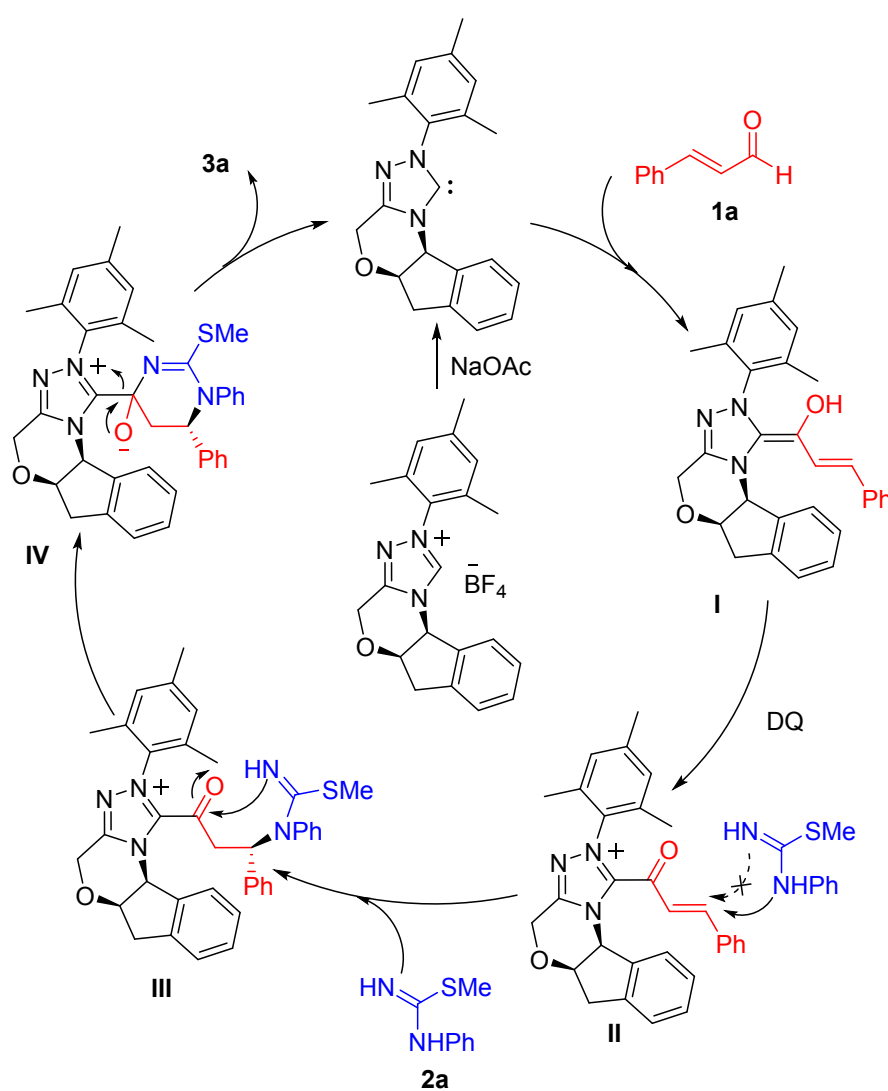

## VI. Procedures for Scale-up Reaction and Synthetic Transformations

### Gram-scale Preparation of 3a



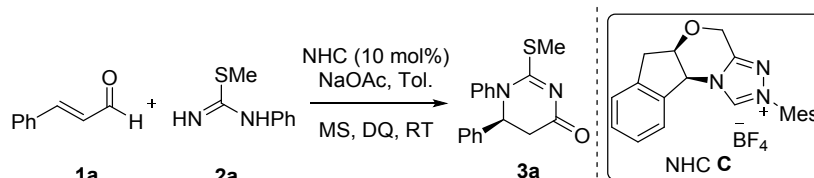

A dry 100 mL Schlenk tube with stir bar was charged with cinnamaldehyde **1a** (12 mmol, 1.2 equiv.), **2a** (1.66 g, 10 mmol, 1.0 equiv.), NHC **C** (420 mg, 10 mol%), NaOAc (1.23 g, 15 mmol, 1.5 equiv.), DQ (5.1 g, 12.5 mmol, 1.25 equiv.) and molecular sieves (1 g). The tube was evacuated and refilled with nitrogen. Then the mixture was dissolved with newly distilled solvent Toluene (50 mL). Then the mixture was stirred at room temperature for 36 h. After complete consumption of the substrate **2a** (monitored by TLC), the mixture was concentrated under vacuum and purified by column chromatography on silica gel (hexane/ethyl acetate = 2:1) to afford desired product **3a** (2.13g) with 72% yield and 93:7 e.r.

### Preparation of **5a**<sup>3</sup>

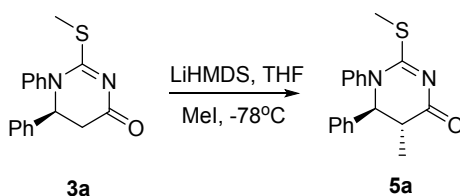

To a stirred solution of **3a** (30 mg, 0.1 mmol) in anhydrous THF (1 mL) at  $-78\text{ }^{\circ}\text{C}$  was added LiHMDS (1 M in THF, 0.15 mL, 0.15 mmol), and the solution was stirred for 2 hrs. The iodomethane (28.4 mg, 0.2 mmol) was added dropwise. After that, the temperature of the reaction mixture was slowly raised to room temperature and continued to stir for 20 h at the same temperature. After completion of the reaction,  $\text{H}_2\text{O}$  (1 mL) was added. The organic layer was collected, and the aqueous layer was extracted with EtOAc (twice). The combined organic extracts were washed with brine, dried over  $\text{MgSO}_4$ , filtered, and concentrated under reduced pressure. The residue was purified via silica gel flash chromatography (hexane/ethyl acetate = 5:1) to afford product **5a** (27 mg, 87%, 91:9 e.r., >99:1 d.r.).

### Preparation of **5b**<sup>4</sup>

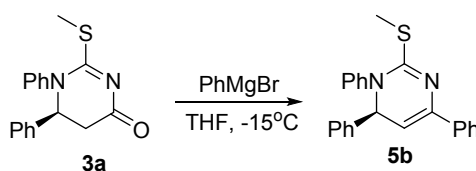

The product **3a** (30 mg, 0.1 mmol) was suspended in dry THF and then cooled  $-15\text{ }^{\circ}\text{C}$ . Grignard reagent (PhMgBr, 1.2 equiv.) was then added dropwise, and the reaction mixture was stirred at  $-15\text{ }^{\circ}\text{C}$  for 5 h. Trifluoroacetic acid (3.0 equiv.) was then carefully added, and the reaction was stirred at  $-15\text{ }^{\circ}\text{C}$  for another 30 minutes. The mixture was concentrated under reduced pressure, diluted with water, and extracted with EtOAc. The combined organic layers were dried over  $\text{MgSO}_4$ , filtered, and concentrated

under reduced pressure. The residue was purified by column chromatography (hexane/ethyl acetate = 1:50) to obtain **5b** (35 mg, 98%, 90:10 e.r.).

#### Preparation of **5c**

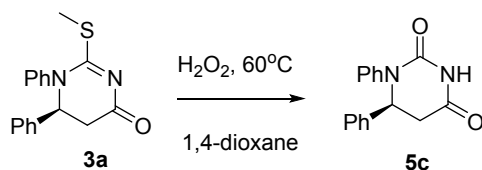

The product **3a** (30 mg, 0.1 mmol) was dissolved in 1,4-dioxane and then H<sub>2</sub>O<sub>2</sub> (35% v/v, 1 mL) was added. Then the solution was heated at 60 °C for 6 hrs. Solvent was evaporated and the reaction mixture was extracted with EtOAc. The combined organic layers were dried over MgSO<sub>4</sub>, filtered, and concentrated under reduced pressure. Pure **5c** (21.6 mg, 81%, 91:9 e.r.) was obtained by silica gel column chromatography (hexane/ethyl acetate = 5:1).

#### Preparation of **5d**

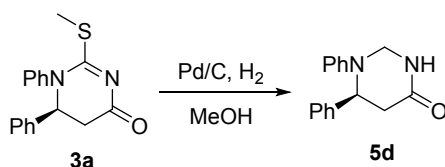

The product **3a** (30 mg, 0.1 mmol) and Pd/C (10 mol%) was added to MeOH (10 ml). Then solution was degassed using pump and bubbled with H<sub>2</sub> gas (5 times). The reaction mixture was stirred until the starting materials consumed completely. When the reaction was finished, MeOH was evaporated and EtOAc was added to the reaction mixture. Excess Pd/C was filtered through celite, solvent was evaporated and concentrated under reduced pressure. Silica gel column chromatography (hexane/ethyl acetate = 3:1) of the residue provided the pure **5d** (18.4 mg, 73%, 93:7 e.r.).

## VII. Reference

1. I. Cohen, *Synthesis* 1980, **1980**, 60.
2. K. Mailyan, J. L. Chen, W. Li, A. A. Keller, S. M. Sternisha, B. G. Miller, A. Zakarian, *J. Am. Chem. Soc.* 2018, **140**, 6027.
3. C.-L. Zhang, D.-L. Wang, K.-Q. Chen, S. Ye *Org. Biomol. Chem.*, 2015, **13**, 11255.
4. B. Ranieri, O. Robles, D. Romo, *J. Org. Chem.*, 2013, **78**, 6291.

### Part 3. Characterization of products

#### I. Characterizations of Products

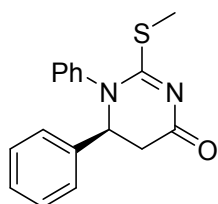

#### (S)-2-(methylthio)-1,6-diphenyl-5,6-dihydropyrimidin-4(1H)-one (3a)

**Yield:** 23 mg (78%)

**<sup>1</sup>H NMR** (400 MHz, CDCl<sub>3</sub>) δ 7.41 – 7.24 (m, 6H), 7.24 – 7.16 (m, 2H), 7.12 (s, 2H), 4.91 (dd, *J* = 7.7, 3.6 Hz, 1H), 3.25 (dd, *J* = 15.4, 7.8 Hz, 1H), 2.88 (dd, *J* = 15.4, 3.6 Hz, 1H), 2.46 (s, 3H). **<sup>13</sup>C NMR** (100 MHz, CDCl<sub>3</sub>) δ 173.8, 173.1, 140.7, 138.5, 129.7, 129.5, 129.2, 128.8, 128.7, 126.8, 64.9, 38.6, 15.2 ppm.

**HRMS** (ESI, *m/z*): calculated for C<sub>17</sub>H<sub>16</sub>N<sub>2</sub>OSH<sup>+</sup>: 297.1062 (M+H)<sup>+</sup>, found: 297.1063.

[α]<sub>D</sub><sup>21</sup> = +3.6 (c = 1.0 in CHCl<sub>3</sub>).

**HPLC** analysis: 95:5 *e.r.* (ADH, 15:85 *i*PrOH/Hexane, 0.5 mL/min), R<sub>t</sub> (minor) = 22.1 min, R<sub>t</sub> (major) = 28.1 min.

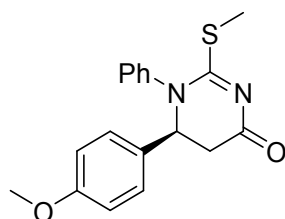

#### (S)-6-(4-methoxyphenyl)-2-(methylthio)-1-phenyl-5,6-dihydropyrimidin-4(1H)-one (3b)

**Yield:** 25 mg (77%)

**<sup>1</sup>H NMR** (400 MHz, CDCl<sub>3</sub>) δ 7.34 (dd, *J* = 4.5, 2.1 Hz, 3H), 7.09 (dd, *J* = 6.7, 2.0 Hz, 4H), 6.87 – 6.75 (m, 2H), 4.84 (dd, *J* = 7.6, 3.8 Hz, 1H), 3.77 (s, 3H), 3.21 (dd, *J* = 15.4, 7.6 Hz, 1H), 2.87 (dd, *J* = 15.4, 3.9 Hz, 1H), 2.45 (s, 3H). **<sup>13</sup>C NMR (100 MHz, CDCl<sub>3</sub>)** δ 173.6, 173.4, 159.9, 140.8, 130.7, 129.6, 129.5, 128.8, 128.3, 114.6, 64.5, 55.4, 38.8, 15.3 ppm.

**HRMS** (ESI, *m/z*): calculated for C<sub>18</sub>H<sub>18</sub>N<sub>2</sub>O<sub>2</sub>SH<sup>+</sup>: 327.1167 (M+H)<sup>+</sup>, found: 327.1169.

[α]<sub>D</sub><sup>21</sup> = -5.3 (c = 1.0 in CHCl<sub>3</sub>).

**HPLC** analysis: 94.5:5.5 *e.r.* (ADH, 15:85 *i*PrOH/Hexane, 0.5 mL/min), R<sub>t</sub> (minor) = 35.7 min, R<sub>t</sub> (major) = 38.9 min.

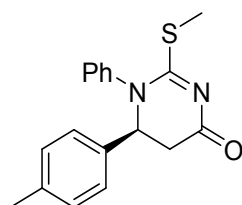

**(S)-2-(methylthio)-1-phenyl-6-(p-tolyl)-5,6-dihydropyrimidin-4(1H)-one (3c)**

**Yield:** 24 mg (78%)

**<sup>1</sup>H NMR** (400 MHz, CDCl<sub>3</sub>) δ 7.42 – 7.28 (m, 3H), 7.18 – 6.97 (m, 6H), 4.86 (dd, *J* = 7.7, 3.7 Hz, 1H), 3.22 (dd, *J* = 15.4, 7.7 Hz, 1H), 2.86 (dd, *J* = 15.4, 3.7 Hz, 1H), 2.45 (s, 3H), 2.30 (s, 3H). **<sup>13</sup>C NMR** (100 MHz, CDCl<sub>3</sub>) δ 173.6, 173.2, 140.8, 138.6, 135.6, 129.9, 129.6, 129.4, 128.7, 126.8, 64.8, 38.8, 21.2, 15.2 ppm.

**HRMS** (ESI, *m/z*): calculated for C<sub>18</sub>H<sub>18</sub>N<sub>2</sub>O<sub>2</sub>SH<sup>+</sup>: 311.1218 (M+H)<sup>+</sup>, found: 311.1218.

[α]<sub>D</sub><sup>21</sup> = -1.4 (c = 1.7 in CHCl<sub>3</sub>).

**HPLC** analysis: 94.5:5.5 *e.r.* (ADH, 15:85 *i*PrOH/Hexane, 0.5 mL/min), R<sub>t</sub> (minor) = 22.0 min, R<sub>t</sub> (major) = 28.4 min.

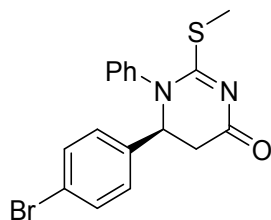

**(S)-6-(4-bromophenyl)-2-(methylthio)-1-phenyl-5,6-dihydropyrimidin-4(1H)-one (3d)**

**Yield:** 30 mg (81%)

**<sup>1</sup>H NMR** (400 MHz, CDCl<sub>3</sub>) δ 7.48 – 7.39 (m, 2H), 7.39 – 7.30 (m, 3H), 7.16 – 6.99 (m, 4H), 4.87 (dd, *J* = 7.7, 3.4 Hz, 1H), 3.24 (dd, *J* = 15.4, 7.8 Hz, 1H), 2.83 (dd, *J* = 15.4, 3.5 Hz, 1H), 2.45 (s, 3H). **<sup>13</sup>C NMR** (100 MHz, CDCl<sub>3</sub>) δ 173.9, 172.6, 140.6, 137.7, 132.5, 129.8, 129.7, 128.6, 128.6, 122.9, 64.4, 38.5, 15.3 ppm.

**HRMS** (ESI, *m/z*): calculated for C<sub>17</sub>H<sub>15</sub>BrN<sub>2</sub>O<sub>2</sub>SH<sup>+</sup>: 375.0167 (M+H)<sup>+</sup>, found: 375.0167.

[α]<sub>D</sub><sup>21</sup> = +3.7 (c = 1.7 in CHCl<sub>3</sub>).

**HPLC** analysis: 95.5:4.5 *e.r.* (ADH, 15:85 *i*PrOH/Hexane, 0.5 mL/min), R<sub>t</sub> (minor) = 26.3 min, R<sub>t</sub> (major) = 37.4 min.

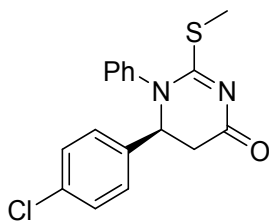

**(S)-6-(4-chlorophenyl)-2-(methylthio)-1-phenyl-5,6-dihydropyrimidin-4(1H)-one (3e)**

**Yield:** 27 mg (82%)

**<sup>1</sup>H NMR** (400 MHz, CDCl<sub>3</sub>) δ 7.41 – 7.31 (m, 3H), 7.31 – 7.27 (m, 2H), 7.18 – 6.99 (m, 4H), 4.88 (dd, *J* = 7.7, 3.5 Hz, 1H), 3.24 (dd, *J* = 15.4, 7.7 Hz, 1H), 2.84 (dd, *J* = 15.4, 3.5 Hz, 1H), 2.45 (s, 3H). **<sup>13</sup>C NMR** (100 MHz, CDCl<sub>3</sub>) δ 173.9, 172.7, 140.6, 137.2, 134.8, 129.8, 129.7, 129.5, 128.7, 128.3, 64.4, 38.5, 15.3 ppm.

**HRMS** (ESI, *m/z*): calculated for C<sub>17</sub>H<sub>15</sub>ClN<sub>2</sub>O<sub>2</sub>S<sup>+</sup>: 331.0672 (M+H)<sup>+</sup>, found: 331.0672.

[α]<sup>21</sup><sub>D</sub> = +12.0 (c = 0.8 in CHCl<sub>3</sub>).

**HPLC** analysis: 95:5 *e.r.* (ADH, 15:85 <sup>i</sup>PrOH/Hexane, 0.5 mL/min), R<sub>t</sub> (minor) = 24.2 min, R<sub>t</sub> (major) = 30.7 min.

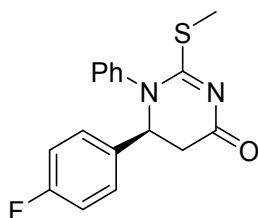

**(S)-6-(4-fluorophenyl)-2-(methylthio)-1-phenyl-5,6-dihydropyrimidin-4(1H)-one (3f)**

**Yield:** 27 mg (86%)

**<sup>1</sup>H NMR** (400 MHz, CDCl<sub>3</sub>) δ 7.43 – 7.29 (m, 3H), 7.22 – 7.13 (m, 2H), 7.10 (s, 2H), 7.03 – 6.92 (m, 2H), 4.90 (dd, *J* = 7.7, 3.6 Hz, 1H), 3.24 (dd, *J* = 15.4, 7.7 Hz, 1H), 2.85 (dd, *J* = 15.4, 3.6 Hz, 1H), 2.45 (s, 3H). **<sup>13</sup>C NMR** (100 MHz, CDCl<sub>3</sub>) δ 173.8, 172.9, 164.1, 161.7, 140.6, 134.5 (d, *J* = 3.3 Hz), 129.7 (d, *J* = 14.8 Hz), 128.8 (d, *J* = 8.6 Hz), 116.2, 116.0, 64.1, 38.5, 15.1 ppm.

**HRMS** (ESI, *m/z*): calculated for C<sub>17</sub>H<sub>15</sub>FN<sub>2</sub>O<sub>2</sub>S<sup>+</sup>: 315.0967 (M+H)<sup>+</sup>, found: 315.0967.

[α]<sup>21</sup><sub>D</sub> = -6.4 (c = 2.2 in CHCl<sub>3</sub>).

**HPLC** analysis: 94:6 *e.r.* (ADH, 15:85 <sup>i</sup>PrOH/Hexane, 0.5 mL/min), R<sub>t</sub> (minor) = 23.5 min, R<sub>t</sub> (major) = 29.1 min.

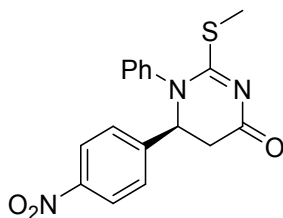

**(S)-2-(methylthio)-6-(4-nitrophenyl)-1-phenyl-5,6-dihydropyrimidin-4(1H)-one (3g)**

**Yield:** 30 mg (88%)

**<sup>1</sup>H NMR** (400 MHz, CDCl<sub>3</sub>) δ 8.27 – 8.09 (m, 2H), 7.51 – 7.31 (m, 5H), 7.13 (d, *J* = 5.6 Hz, 2H), 5.06 (dd, *J* = 7.8, 3.2 Hz, 1H), 3.31 (dd, *J* = 15.4, 7.9 Hz, 1H), 2.85 (dd, *J* = 15.4, 3.3 Hz, 1H), 2.47 (s, 3H).

$^{13}\text{C}$  NMR (100 MHz,  $\text{CDCl}_3$ )  $\delta$  174.0, 171.7, 148.0, 145.7, 140.4, 130.0, 129.9, 128.4, 127.9, 124.6, 64.2, 38.2, 15.3 ppm.

HRMS (ESI,  $m/z$ ): calculated for  $\text{C}_{17}\text{H}_{15}\text{N}_3\text{O}_3\text{SH}^+$ : 342.0912 ( $\text{M}+\text{H}$ ) $^+$ , found: 342.0912.

$[\alpha]^{21}_{\text{D}}$  = +51.8 ( $c$  = 0.3 in  $\text{CHCl}_3$ ).

HPLC analysis: 91.5:8.5 *e.r.* (ADH, 15:85  $i$ PrOH/Hexane, 0.5 mL/min),  $R_t$  (minor) = 36.3 min,  $R_t$  (major) = 71.4 min.

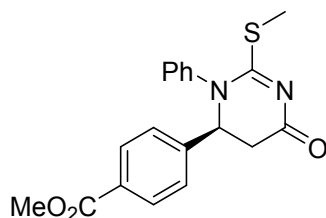

**methyl (S)-4-(2-(methylthio)-6-oxo-3-phenyl-3,4,5,6-tetrahydropyrimidin-4-yl)benzoate (3h)**

Yield: 28 mg (79%)

$^1\text{H}$  NMR (400 MHz,  $\text{CDCl}_3$ )  $\delta$  8.02 – 7.90 (m, 2H), 7.34 (dd,  $J$  = 7.6, 3.9 Hz, 3H), 7.28 (d,  $J$  = 7.0 Hz, 2H), 7.11 (d,  $J$  = 5.7 Hz, 2H), 4.98 (dd,  $J$  = 7.8, 3.5 Hz, 1H), 3.90 (s, 3H), 3.27 (dd,  $J$  = 15.4, 7.8 Hz, 1H), 2.86 (dd,  $J$  = 15.4, 3.5 Hz, 1H), 2.46 (s, 3H).  $^{13}\text{C}$  NMR (101 MHz,  $\text{CDCl}_3$ )  $\delta$  174.0, 172.5, 166.5, 143.5, 140.6, 130.7, 130.5, 129.8, 129.7, 128.6, 126.9, 64.6, 52.3, 38.4, 15.3 ppm.

HRMS (ESI,  $m/z$ ): calculated for  $\text{C}_{19}\text{H}_{18}\text{N}_2\text{O}_3\text{SH}^+$ : 355.1116 ( $\text{M}+\text{H}$ ) $^+$ , found: 375.0167.

$[\alpha]^{21}_{\text{D}}$  = +15.7 ( $c$  = 1.7 in  $\text{CHCl}_3$ ).

HPLC analysis: 95:5 *e.r.* (ORJH, 15:85  $i$ PrOH/Hexane, 0.5 mL/min),  $R_t$  (minor) = 34.1 min,  $R_t$  (major) = 40.2 min.

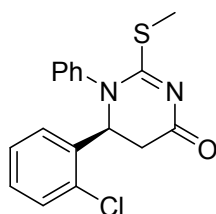

**(S)-6-(2-chlorophenyl)-2-(methylthio)-1-phenyl-5,6-dihydropyrimidin-4(1H)-one (3i)**

Yield: 24 mg (73%)

$^1\text{H}$  NMR (400 MHz,  $\text{CDCl}_3$ )  $\delta$  7.54 – 7.44 (m, 1H), 7.43 – 7.33 (m, 3H), 7.30 (dd,  $J$  = 7.5, 1.0 Hz, 2H), 7.26 – 7.09 (m, 3H), 5.47 (dd,  $J$  = 7.9, 2.7 Hz, 1H), 3.23 (dd,  $J$  = 15.4, 7.9 Hz, 1H), 2.90 (dd,  $J$  = 15.4, 2.8 Hz, 1H), 2.48 (s, 3H).  $^{13}\text{C}$  NMR (100 MHz,  $\text{CDCl}_3$ )  $\delta$  174.2, 172.6, 140.9, 135.4, 132.3, 130.4, 129.9, 129.8, 129.6, 128.3, 127.8, 127.7, 61.2, 37.1, 15.3 ppm.

HRMS (ESI,  $m/z$ ): calculated for  $\text{C}_{17}\text{H}_{15}\text{ClN}_2\text{OSH}^+$ : 331.0672 ( $\text{M}+\text{H}$ ) $^+$ , found: 331.0672.

$[\alpha]^{21}_{\text{D}}$  = +51.9 ( $c$  = 1.9 in  $\text{CHCl}_3$ ).

HPLC analysis: 96:4 *e.r.* (ADH, 15:85  $i$ PrOH/Hexane, 0.5 mL/min),  $R_t$  (minor) = 21.9 min,  $R_t$  (major) = 53.3 min.

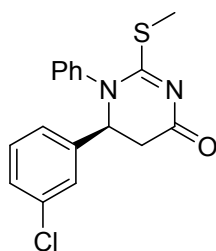

**(S)-6-(3-chlorophenyl)-2-(methylthio)-1-phenyl-5,6-dihydropyrimidin-4(1H)-one (3j)**

**Yield:** 18 mg (54%)

**<sup>1</sup>H NMR** (400 MHz, CDCl<sub>3</sub>) δ 7.37 (dd, *J* = 7.2, 4.1 Hz, 3H), 7.30 – 7.23 (m, 2H), 7.13 (dd, *J* = 5.4, 2.5 Hz, 4H), 4.89 (dd, *J* = 7.7, 3.4 Hz, 1H), 3.24 (dd, *J* = 15.4, 7.8 Hz, 1H), 2.84 (dd, *J* = 15.4, 3.4 Hz, 1H), 2.46 (s, 3H). **<sup>13</sup>C NMR** (100 MHz, CDCl<sub>3</sub>) δ 174.0, 172.5, 140.6, 140.6, 135.1, 130.6, 129.8, 129.7, 129.1, 128.6, 127.1, 124.9, 64.4, 38.5, 15.3 ppm.

**HRMS** (ESI, *m/z*): calculated for C<sub>17</sub>H<sub>15</sub>ClN<sub>2</sub>OSH<sup>+</sup>: 331.0672 (M+H)<sup>+</sup>, found: 331.0672.

[α]<sub>D</sub><sup>21</sup> = +11.9 (c = 1.9 in CHCl<sub>3</sub>).

**HPLC** analysis: 92:8 *e.r.* (ADH, 15:85 *i*PrOH/Hexane, 0.5 mL/min), R<sub>t</sub> (minor) = 21.0 min, R<sub>t</sub> (major) = 24.0 min.

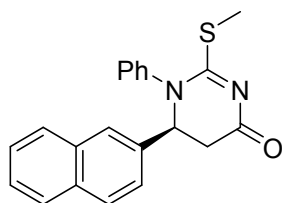

**(S)-2-(methylthio)-6-(naphthalen-2-yl)-1-phenyl-5,6-dihydropyrimidin-4(1H)-one (3k)**

**Yield:** 27 mg (78%)

**<sup>1</sup>H NMR** (400 MHz, CDCl<sub>3</sub>) δ 7.86 – 7.69 (m, 3H), 7.59 (s, 1H), 7.52 – 7.40 (m, 2H), 7.38 – 7.27 (m, 4H), 7.14 (s, 2H), 5.07 (dd, *J* = 7.8, 3.6 Hz, 1H), 3.31 (dd, *J* = 15.5, 7.8 Hz, 1H), 2.96 (dd, *J* = 15.5, 3.7 Hz, 1H), 2.49 (s, 3H). **<sup>13</sup>C NMR** (100 MHz, CDCl<sub>3</sub>) δ 173.9, 173.0, 140.8, 136.0, 133.4, 133.3, 129.7, 129.5, 129.4, 128.7, 128.2, 127.8, 126.7, 126.7, 126.2, 124.2, 65.2, 38.7, 15.3 ppm.

**HRMS** (ESI, *m/z*): calculated for C<sub>21</sub>H<sub>18</sub>N<sub>2</sub>OSH<sup>+</sup>: 347.1218 (M+H)<sup>+</sup>, found: 347.1218.

[α]<sub>D</sub><sup>21</sup> = +5.2 (c = 1.1 in CHCl<sub>3</sub>).

**HPLC** analysis: 95.5:4.5 *e.r.* (ADH, 15:85 *i*PrOH/Hexane, 0.5 mL/min), R<sub>t</sub> (minor) = 34.9 min, R<sub>t</sub> (major) = 48.2 min.

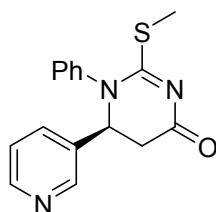

**(S)-2-(methylthio)-1-phenyl-6-(pyridin-3-yl)-5,6-dihydropyrimidin-4(1H)-one (3l)**

**Yield:** 20 mg (67%)

**<sup>1</sup>H NMR** (400 MHz, CDCl<sub>3</sub>) δ 8.56 (d, *J* = 3.7 Hz, 1H), 8.35 (s, 1H), 7.67 (d, *J* = 7.8 Hz, 1H), 7.37 (s, 3H), 7.29 (dd, *J* = 8.8, 6.3 Hz, 1H), 7.10 (s, 2H), 4.97 (dd, *J* = 7.4, 3.6 Hz, 1H), 3.29 (dd, *J* = 15.4, 7.6

Hz, 1H), 2.88 (dd,  $J = 15.4, 3.6$  Hz, 1H), 2.46 (s, 3H).  $^{13}\text{C NMR}$  (100 MHz,  $\text{CDCl}_3$ )  $\delta$  174.1, 172.3, 150.4, 148.7, 140.3, 134.3, 130.0, 129.8, 128.6, 124.2, 62.6, 38.3, 15.3 ppm.

**HRMS** (ESI,  $m/z$ ): calculated for  $\text{C}_{16}\text{H}_{15}\text{N}_3\text{OSH}^+$ : 298.1014 ( $\text{M}+\text{H}$ ) $^+$ , found: 298.1017.

$[\alpha]^{21}_{\text{D}} = +2.3$  ( $c = 0.9$  in  $\text{CHCl}_3$ ).

**HPLC** analysis: 94.5:5.5 *e.r.* (ADH, 15:85  $i$ PrOH/Hexane, 0.5 mL/min),  $R_t$  (minor) = 45.6 min,  $R_t$  (major) = 50.2 min.

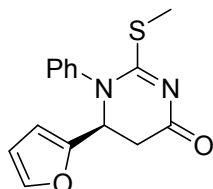

**(S)-6-(furan-2-yl)-2-(methylthio)-1-phenyl-5,6-dihydropyrimidin-4(1H)-one (3m)**

**Yield:** 19 mg (63%)

$^1\text{H NMR}$  (400 MHz,  $\text{CDCl}_3$ )  $\delta$  7.40 (dd,  $J = 7.1, 4.3$  Hz, 3H), 7.35 (dd,  $J = 1.8, 0.7$  Hz, 1H), 7.13 (s, 2H), 6.26 (dd,  $J = 3.3, 1.9$  Hz, 1H), 6.19 (d,  $J = 3.2$  Hz, 1H), 4.95 (dd,  $J = 7.0, 4.8$  Hz, 1H), 3.15 (dd,  $J = 15.6, 7.1$  Hz, 1H), 3.04 (dd,  $J = 15.6, 4.8$  Hz, 1H), 2.41 (s, 3H).  $^{13}\text{C NMR}$  (100 MHz,  $\text{CDCl}_3$ )  $\delta$  173.5, 173.1, 150.4, 143.2, 140.4, 129.7, 129.7, 128.8, 110.6, 109.3, 58.0, 35.9, 15.2 ppm.

**HRMS** (ESI,  $m/z$ ): calculated for  $\text{C}_{15}\text{H}_{14}\text{N}_2\text{O}_2\text{SH}^+$ : 287.0854 ( $\text{M}+\text{H}$ ) $^+$ , found: 287.0854.

$[\alpha]^{21}_{\text{D}} = -19.1$  ( $c = 1.8$  in  $\text{CHCl}_3$ ).

**HPLC** analysis: 90:10 *e.r.* (OD, 15:85  $i$ PrOH/Hexane, 0.5 mL/min),  $R_t$  (minor) = 29.2 min,  $R_t$  (major) = 31.6 min.

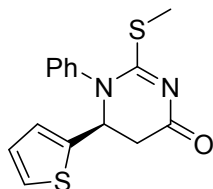

**(S)-2-(methylthio)-1-phenyl-6-(thiophen-2-yl)-5,6-dihydropyrimidin-4(1H)-one (3n)**

**Yield:** 18 mg (60%)

$^1\text{H NMR}$  (400 MHz,  $\text{CDCl}_3$ )  $\delta$  7.38 (d,  $J = 5.8$  Hz, 3H), 7.23 (dd,  $J = 4.3, 2.0$  Hz, 1H), 7.13 (s, 2H), 6.89 (dd,  $J = 5.2, 2.7$  Hz, 2H), 5.16 (dd,  $J = 7.1, 4.1$  Hz, 1H), 3.26 (dd,  $J = 15.5, 7.1$  Hz, 1H), 3.00 (dd,  $J = 15.5, 4.1$  Hz, 1H), 2.43 (s, 3H).  $^{13}\text{C NMR}$  (100 MHz,  $\text{CDCl}_3$ )  $\delta$  173.4, 172.8, 140.6, 140.3, 129.7, 128.9, 127.0, 126.8, 126.2, 60.2, 39.05, 15.3 ppm.

**HRMS** (ESI,  $m/z$ ): calculated for  $\text{C}_{15}\text{H}_{14}\text{N}_2\text{OS}_2\text{H}^+$ : 303.0626 ( $\text{M}+\text{H}$ ) $^+$ , found: 303.0626.

$[\alpha]^{21}_{\text{D}} = -79.8$  ( $c = 0.9$  in  $\text{CHCl}_3$ ).

**HPLC** analysis: 90:10 *e.r.* (ADH, 15:85  $i$ PrOH/Hexane, 0.5 mL/min),  $R_t$  (minor) = 29.2 min,  $R_t$  (major) = 31.6 min.

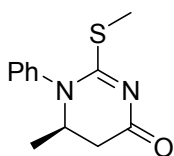

**(R)-6-methyl-2-(methylthio)-1-phenyl-5,6-dihydropyrimidin-4(1H)-one (3o)**



**Yield:** 20 mg (85%)

**<sup>1</sup>H NMR** (400 MHz, CDCl<sub>3</sub>) δ 7.54 – 7.42 (m, 3H), 7.32 – 7.21 (m, 2H), 4.10 – 3.86 (m, 1H), 2.95 (dd, *J* = 15.2, 6.4 Hz, 1H), 2.59 (dd, *J* = 15.2, 4.9 Hz, 1H), 2.39 (s, 3H), 1.23 (d, *J* = 6.6 Hz, 3H). **<sup>13</sup>C NMR** (100 MHz, CDCl<sub>3</sub>) δ 173.9, 172.6, 140.1, 129.9, 129.6, 128.9, 56.4, 38.3, 18.3, 15.1 ppm.

**HRMS** (ESI, *m/z*): calculated for C<sub>12</sub>H<sub>14</sub>N<sub>2</sub>O<sup>SH</sup><sup>+</sup>: 235.0905 (M+H)<sup>+</sup>, found: 235.0907.

[α]<sub>D</sub><sup>21</sup> = +18.1 (c = 1.1 in CHCl<sub>3</sub>).

**HPLC** analysis: 80.5:19.5 *e.r.* (ASH, 30:70 <sup>i</sup>PrOH/Hexane, 0.5 mL/min), R<sub>t</sub> (minor) = 43.6 min, R<sub>t</sub> (major) = 80.4 min.

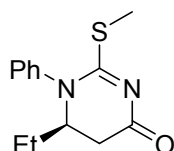

**(R)-6-ethyl-2-(methylthio)-1-phenyl-5,6-dihydropyrimidin-4(1H)-one (3p)**

**Yield:** 20 mg (81%)

**<sup>1</sup>H NMR** (400 MHz, CDCl<sub>3</sub>) δ 7.54 – 7.42 (m, 2H), 7.33 – 7.22 (m, 2H), 3.86 – 3.63 (m, 1H), 2.92 (dd, *J* = 15.4, 6.9 Hz, 1H), 2.72 (dd, *J* = 15.4, 3.8 Hz, 1H), 2.38 (s, 2H), 1.74 – 1.49 (m, 2H), 0.88 (t, *J* = 7.5 Hz, 3H). **<sup>13</sup>C NMR** (100 MHz, CDCl<sub>3</sub>) δ 174.0, 172.8, 140.4, 129.9, 129.6, 128.9, 61.9, 34.6, 24.6, 15.1, 9.4 ppm.

**HRMS** (ESI, *m/z*): calculated for C<sub>13</sub>H<sub>16</sub>N<sub>2</sub>O<sup>SH</sup><sup>+</sup>: 249.1062 (M+H)<sup>+</sup>, found: 249.1062.

[α]<sub>D</sub><sup>21</sup> = +45.6 (c = 1.8 in CHCl<sub>3</sub>).

**HPLC** analysis: 89:11 *e.r.* (ADH, 15:85 <sup>i</sup>PrOH/Hexane, 0.5 mL/min), R<sub>t</sub> (minor) = 17.7 min, R<sub>t</sub> (major) = 19.5 min.

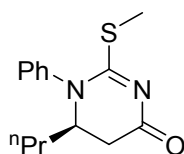

**(R)-2-(methylthio)-1-phenyl-6-propyl-5,6-dihydropyrimidin-4(1H)-one (3q)**

**Yield:** 23 mg (90%)

**<sup>1</sup>H NMR** (400 MHz, CDCl<sub>3</sub>) δ 7.55 – 7.39 (m, 3H), 7.34 – 7.21 (m, 2H), 3.96 – 3.63 (m, 1H), 2.92 (dd, *J* = 15.3, 6.8 Hz, 1H), 2.70 (dd, *J* = 15.3, 3.6 Hz, 1H), 2.38 (s, 3H), 1.75 – 1.46 (m, 2H), 1.46 – 1.30 (m, 1H), 1.19 (dddd, *J* = 13.3, 10.5, 9.7, 4.7 Hz, 1H), 0.83 (t, *J* = 7.3 Hz, 3H). **<sup>13</sup>C NMR** (100 MHz, CDCl<sub>3</sub>) δ 174.0, 172.7, 140.5, 129.8, 129.5, 128.9, 60.6, 35.1, 33.6, 18.3, 15.1, 13.8 ppm.

**HRMS** (ESI, *m/z*): calculated for C<sub>14</sub>H<sub>18</sub>N<sub>2</sub>O<sup>SH</sup><sup>+</sup>: 263.1218 (M+H)<sup>+</sup>, found: 263.1218.

[α]<sub>D</sub><sup>21</sup> = +48.0 (c = 2.1 in CHCl<sub>3</sub>).

**HPLC** analysis: 90:10 *e.r.* (ADH, 20:80 <sup>i</sup>PrOH/Hexane, 0.5 mL/min), R<sub>t</sub> (minor) = 35.9 min, R<sub>t</sub> (major) = 44.0 min.

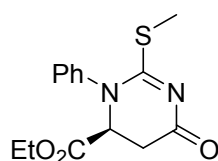

**Ethyl (S)-2-(methylthio)-6-oxo-3-phenyl-3,4,5,6-tetrahydropyrimidin-4-carboxylate (3r)**

**Yield:** 19 mg (65%)

**<sup>1</sup>H NMR** (400 MHz, CDCl<sub>3</sub>) δ 7.54 – 7.32 (m, 5H), 4.48 (dd, *J* = 7.9, 2.8 Hz, 1H), 4.20 (qq, *J* = 10.8, 7.1 Hz, 2H), 3.11 (dd, *J* = 15.9, 7.9 Hz, 1H), 3.03 (dd, *J* = 15.9, 2.8 Hz, 1H), 2.42 (s, 3H), 1.25 (t, *J* = 7.1 Hz, 3H). **<sup>13</sup>C NMR** (100 MHz, CDCl<sub>3</sub>) δ 174.2, 171.6, 169.0, 140.9, 130.0, 129.9, 128.7, 62.7, 62.6, 34.0, 15.2, 14.1 ppm.

**HRMS** (ESI, *m/z*): calculated for C<sub>14</sub>H<sub>16</sub>N<sub>2</sub>O<sub>3</sub>SH<sup>+</sup>: 293.0960 (M+H)<sup>+</sup>, found: 293.0960.

[α]<sub>D</sub><sup>21</sup> = +43.3 (*c* = 1.4 in CHCl<sub>3</sub>).

**HPLC** analysis: 85:15 *e.r.* (ADH, 15:85 *i*PrOH/Hexane, 0.5 mL/min), R<sub>t</sub> (minor) = 21.9 min, R<sub>t</sub> (major) = 26.6 min.

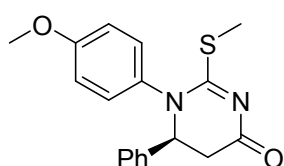

**(S)-1-(4-methoxyphenyl)-2-(methylthio)-6-phenyl-5,6-dihydropyrimidin-4(1H)-one (4a)**

**Yield:** 27 mg (83%)

**<sup>1</sup>H NMR** (400 MHz, CDCl<sub>3</sub>) δ 7.37 – 7.22 (m, 3H), 7.22 – 7.12 (m, 2H), 7.00 (s, 2H), 6.81 (d, *J* = 8.2 Hz, 2H), 4.85 (dd, *J* = 7.8, 3.5 Hz, 1H), 3.77 (s, 3H), 3.23 (dd, *J* = 15.4, 7.8 Hz, 1H), 2.86 (dd, *J* = 15.4, 3.5 Hz, 1H), 2.44 (s, 3H). **<sup>13</sup>C NMR** (100 MHz, CDCl<sub>3</sub>) δ 174.3, 173.1, 160.1, 138.7, 133.3, 129.8, 129.2, 128.7, 126.9, 114.7, 65.06, 55.5, 38.6, 15.2 ppm.

**HRMS** (ESI, *m/z*): calculated for C<sub>18</sub>H<sub>18</sub>N<sub>2</sub>O<sub>2</sub>SH<sup>+</sup>: 327.1167 (M+H)<sup>+</sup>, found: 327.1167.

[α]<sub>D</sub><sup>21</sup> = -1.3 (*c* = 1.9 in CHCl<sub>3</sub>).

**HPLC** analysis: 93:7 *e.r.* (ADH, 15:85 *i*PrOH/Hexane, 0.5 mL/min), R<sub>t</sub> (minor) = 30.6 min, R<sub>t</sub> (major) = 35.0 min.

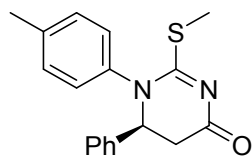

**(S)-2-(methylthio)-6-phenyl-1-(p-tolyl)-5,6-dihydropyrimidin-4(1H)-one (4b)**

**Yield:** 24 mg (77%)

**<sup>1</sup>H NMR** (400 MHz, CDCl<sub>3</sub>) δ 7.30 (ddd, *J* = 10.7, 4.2, 2.7 Hz, 3H), 7.23 – 7.15 (m, 2H), 7.13 (d, *J* = 8.0 Hz, 2H), 6.99 (d, *J* = 7.1 Hz, 2H), 4.87 (dd, *J* = 7.8, 3.4 Hz, 1H), 3.23 (dd, *J* = 15.4, 7.8 Hz, 1H), 2.86 (dd, *J* = 15.4, 3.4 Hz, 1H), 2.45 (s, 3H), 2.33 (s, 3H). **<sup>13</sup>C NMR** (100 MHz, CDCl<sub>3</sub>) δ 173.9, 173.1, 139.7, 138.7, 138.2, 130.3, 129.2, 128.7, 128.3, 126.8, 65.0, 38.6, 21.3, 15.2 ppm.

**HRMS** (ESI, *m/z*): calculated for C<sub>18</sub>H<sub>18</sub>N<sub>2</sub>O<sub>2</sub>SH<sup>+</sup>: 311.1218 (M+H)<sup>+</sup>, found: 311.1218.

[α]<sub>D</sub><sup>21</sup> = +0.1 (*c* = 1.9 in CHCl<sub>3</sub>).

**HPLC** analysis: 95:5 *e.r.* (ADH, 15:85 *i*PrOH/Hexane, 0.5 mL/min), R<sub>t</sub> (minor) = 20.7 min, R<sub>t</sub> (major) = 24.2 min.

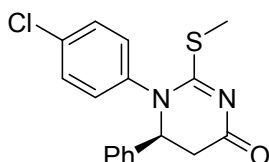

**(S)-1-(4-chlorophenyl)-2-(methylthio)-6-phenyl-5,6-dihydropyrimidin-4(1H)-one (4c)**

**Yield:** 23 mg (70%)

**<sup>1</sup>H NMR** (400 MHz, CDCl<sub>3</sub>) δ 7.37 – 7.27 (m, 1H), 7.17 (dd, *J* = 7.0, 2.3 Hz, 1H), 7.05 (d, *J* = 7.9 Hz, 1H), 4.86 (dd, *J* = 7.6, 3.9 Hz, 1H), 3.23 (dd, *J* = 15.5, 7.7 Hz, 1H), 2.88 (dd, *J* = 15.5, 3.9 Hz, 1H), 2.46 (s, 1H). **<sup>13</sup>C NMR** (100 MHz, CDCl<sub>3</sub>) δ 173.5, 172.9, 139.1, 138.3, 135.5, 130.1, 129.9, 129.3, 129.0, 126.8, 65.05, 38.6, 15.3 ppm.

**HRMS** (ESI, *m/z*): calculated for C<sub>17</sub>H<sub>15</sub>ClN<sub>2</sub>O<sup>+</sup>: 331.0672 (M+H)<sup>+</sup>, found: 331.0672.

[α]<sub>D</sub><sup>21</sup> = -3.3 (c = 1.8 in CHCl<sub>3</sub>).

**HPLC** analysis: 96:4 *e.r.* (OD, 15:85 <sup>i</sup>PrOH/Hexane, 0.5 mL/min), R<sub>t</sub> (minor) = 29.4 min, R<sub>t</sub> (major) = 32.0 min.

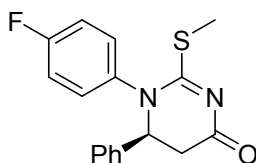

**(S)-1-(4-fluorophenyl)-2-(methylthio)-6-phenyl-5,6-dihydropyrimidin-4(1H)-one (4d)**

**Yield:** 26 mg (83%)

**<sup>1</sup>H NMR** (400 MHz, CDCl<sub>3</sub>) δ 7.36 – 7.28 (m, 3H), 7.17 (dd, *J* = 7.2, 2.3 Hz, 2H), 7.08 (d, *J* = 3.0 Hz, 2H), 7.00 (t, *J* = 8.1 Hz, 2H), 4.86 (dd, *J* = 7.7, 3.9 Hz, 1H), 3.23 (dd, *J* = 15.5, 7.7 Hz, 1H), 2.88 (dd, *J* = 15.5, 3.9 Hz, 1H), 2.46 (s, 3H). **<sup>13</sup>C NMR** (100 MHz, CDCl<sub>3</sub>) δ 173.9, 172.9, 164.0, 161.5, 138.4, 136.6, 130.7 (d, *J* = 8.9 Hz), 129.1 (d, *J* = 38.8 Hz), 126.9, 116.7 (d, *J* = 22.9 Hz), 65.1, 38.6, 15.3 ppm.

**HRMS** (ESI, *m/z*): calculated for C<sub>17</sub>H<sub>15</sub>FN<sub>2</sub>O<sup>+</sup>: 315.0967 (M+H)<sup>+</sup>, found: 315.0967.

[α]<sub>D</sub><sup>21</sup> = -14.5 (c = 2.0 in CHCl<sub>3</sub>).

**HPLC** analysis: 95:5 *e.r.* (ADH, 15:85 <sup>i</sup>PrOH/Hexane, 0.5 mL/min), R<sub>t</sub> (minor) = 22.6 min, R<sub>t</sub> (major) = 25.6 min.

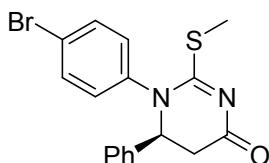

**(S)-1-(4-bromophenyl)-2-(methylthio)-6-phenyl-5,6-dihydropyrimidin-4(1H)-one (4e)**

**Yield:** 26 mg (83%)

**<sup>1</sup>H NMR** (400 MHz, CDCl<sub>3</sub>) δ 7.45 (d, *J* = 8.7 Hz, 2H), 7.36 – 7.28 (m, 3H), 7.22 – 7.11 (m, 2H), 6.99 (d, *J* = 8.0 Hz, 2H), 4.86 (dd, *J* = 7.7, 3.8 Hz, 1H), 3.23 (dd, *J* = 15.5, 7.7 Hz, 1H), 2.88 (dd, *J* = 15.5, 3.8 Hz, 1H), 2.46 (s, 3H). **<sup>13</sup>C NMR** (100 MHz, CDCl<sub>3</sub>) δ 173.4, 172.8, 139.7, 138.3, 132.9, 130.4, 129.3, 129.0, 126.8, 123.6, 65.0, 38.6, 15.2 ppm.

**HRMS** (ESI, *m/z*): calculated for C<sub>17</sub>H<sub>15</sub>BrN<sub>2</sub>O<sup>+</sup>: 375.0167 (M+H)<sup>+</sup>, found: 375.0167.

[α]<sub>D</sub><sup>21</sup> = -0.6 (c = 2.3 in CHCl<sub>3</sub>).

**HPLC** analysis: 95.5:4.5 *e.r.* (OD, 15:85 *i*PrOH/Hexane, 0.5 mL/min),  $R_t$  (minor) = 30.5 min,  $R_t$  (major) = 32.9 min.

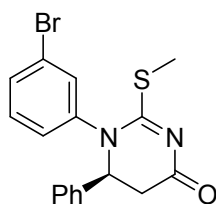

**(S)-1-(3-bromophenyl)-2-(methylthio)-6-phenyl-5,6-dihydropyrimidin-4(1H)-one (4f)**

**Yield:** 23 mg (61%)

**$^1\text{H NMR}$**  (400 MHz,  $\text{CDCl}_3$ )  $\delta$  7.53 – 7.42 (m, 1H), 7.38 – 7.27 (m, 4H), 7.24 – 7.10 (m, 3H), 7.03 (d,  $J$  = 7.5 Hz, 1H), 4.89 (dd,  $J$  = 7.6, 3.8 Hz, 1H), 3.23 (dd,  $J$  = 15.4, 7.6 Hz, 1H), 2.88 (dd,  $J$  = 15.4, 3.8 Hz, 1H), 2.47 (s, 3H).  **$^{13}\text{C NMR}$**  (100 MHz,  $\text{CDCl}_3$ )  $\delta$  173.4, 172.8, 141.9, 138.2, 132.7, 131.9, 130.8, 129.3, 129.0, 127.5, 126.8, 122.8, 65.0, 38.7, 15.3 ppm.

**HRMS** (ESI,  $m/z$ ): calculated for  $\text{C}_{17}\text{H}_{15}\text{BrN}_2\text{OSH}^+$ : 375.0167 ( $\text{M}+\text{H}$ ) $^+$ , found: 375.0166.

$[\alpha]_D^{21} = +8.9$  ( $c = 1.8$  in  $\text{CHCl}_3$ ).

**HPLC** analysis: 95:5 *e.r.* (ADH, 15:85 *i*PrOH/Hexane, 0.5 mL/min),  $R_t$  (minor) = 23.6 min,  $R_t$  (major) = 28.5 min.

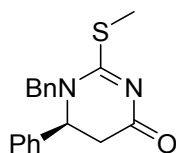

**(S)-1-benzyl-2-(methylthio)-6-phenyl-5,6-dihydropyrimidin-4(1H)-one (4g)**

**Yield:** 18 mg (58%)

**$^1\text{H NMR}$**  (400 MHz,  $\text{CDCl}_3$ )  $\delta$  7.44 – 7.29 (m, 6H), 7.26 – 7.19 (m, 2H), 7.16 – 7.05 (m, 2H), 5.12 (d,  $J$  = 16.3 Hz, 1H), 4.56 (dd,  $J$  = 7.9, 2.7 Hz, 1H), 4.08 (d,  $J$  = 16.3 Hz, 1H), 2.96 (dd,  $J$  = 15.4, 8.0 Hz, 1H), 2.70 (dd,  $J$  = 15.4, 2.8 Hz, 1H), 2.62 (s, 3H).  **$^{13}\text{C NMR}$**  (100 MHz,  $\text{CDCl}_3$ )  $\delta$  172.8, 172.6, 138.0, 135.1, 129.5, 129.3, 128.8, 128.5, 127.5, 126.4, 59.6, 53.0, 38.5, 15.0 ppm.

**HRMS** (ESI,  $m/z$ ): calculated for  $\text{C}_{18}\text{H}_{18}\text{N}_2\text{OSH}^+$ : 311.1218 ( $\text{M}+\text{H}$ ) $^+$ , found: 311.1218.

$[\alpha]_D^{21} = +26.4$  ( $c = 0.8$  in  $\text{CHCl}_3$ ).

**HPLC** analysis: 89.5:10.5 *e.r.* (ADH, 15:85 *i*PrOH/Hexane, 0.5 mL/min),  $R_t$  (minor) = 25.2 min,  $R_t$  (major) = 28.3 min.

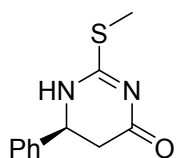

**(S)-2-(methylthio)-6-phenyl-5,6-dihydropyrimidin-4(1H)-one (4h)**

**Yield:** 14.5 mg (66%)

**$^1\text{H NMR}$**  (400 MHz,  $\text{CDCl}_3$ )  $\delta$  8.40 (s, 1H), 7.48 – 7.34 (m, 4H), 7.34 – 7.26 (m, 1H), 4.84 (dd,  $J$  = 12.2, 5.2 Hz, 1H), 2.82 (dd,  $J$  = 16.7, 5.2 Hz, 1H), 2.61 – 2.43 (m, 4H).  **$^{13}\text{C NMR}$**  (100 MHz,  $\text{CDCl}_3$ )  $\delta$  169.8, 152.5, 142.3, 128.8, 127.5, 126.4, 58.8, 38.4, 13.4.

**HRMS** (ESI, m/z): calculated for  $C_{11}H_{12}N_2OSH^+$ : 221.0749 (M+H)<sup>+</sup>, found: 221.0746.

$[\alpha]^{21}_D = +67.0$  (c = 0.5 in  $CHCl_3$ ).

**HPLC** analysis: 87:13 e.r. (ID, 15:85 *i*PrOH/Hexane, 0.5 mL/min),  $R_t$  (major) = 17.9 min,  $R_t$  (minor) = 21.7 min.

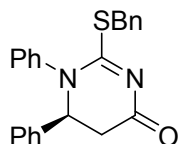

**(S)-2-(benzylthio)-1,6-diphenyl-5,6-dihydropyrimidin-4(1H)-one (4i)**

**Yield:** 19 mg (51%)

**<sup>1</sup>H NMR** (400 MHz,  $CDCl_3$ )  $\delta$  7.37 – 7.14 (m, 12H), 7.10 (s, 2H), 4.90 (dd,  $J = 7.7, 3.6$  Hz, 1H), 4.39 (s, 2H), 3.25 (dd,  $J = 15.4, 7.7$  Hz, 1H), 2.89 (dd,  $J = 15.4, 3.6$  Hz, 1H). **<sup>13</sup>C NMR** (100 MHz,  $CDCl_3$ )  $\delta$  173.0, 172.9, 140.6, 138.5, 136.3, 129.7, 129.6, 129.5, 129.3, 128.8, 128.7, 128.7, 127.6, 126.9, 65.0, 38.7, 37.1 ppm.

**HRMS** (ESI, m/z): calculated for  $C_{23}H_{20}N_2OSH^+$ : 373.1375 (M+H)<sup>+</sup>, found: 373.1372.

$[\alpha]^{21}_D = -15.3$  (c = 0.3 in  $CHCl_3$ ).

**HPLC** analysis: 95.5:4.5 e.r. (ADH, 15:85 *i*PrOH/Hexane, 0.5 mL/min),  $R_t$  (minor) = 28.0 min,  $R_t$  (major) = 34.2 min.

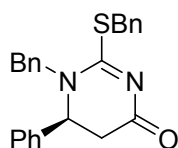

**(S)-1-benzyl-2-(benzylthio)-6-phenyl-5,6-dihydropyrimidin-4(1H)-one (4j)**

**Yield:** 20 mg (52%)

**<sup>1</sup>H NMR** (400 MHz,  $CDCl_3$ )  $\delta$  7.49 – 7.40 (m, 2H), 7.40 – 7.26 (m, 9H), 7.24 – 7.16 (m, 2H), 7.13 (dd,  $J = 7.5, 1.8$  Hz, 2H), 5.10 (d,  $J = 16.2$  Hz, 1H), 4.69 – 4.42 (m, 3H), 4.06 (t,  $J = 16.6$  Hz, 1H), 2.96 (dd,  $J = 15.4, 8.0$  Hz, 1H), 2.70 (dd,  $J = 15.4, 2.8$  Hz, 1H). **<sup>13</sup>C NMR** (100 MHz,  $CDCl_3$ )  $\delta$  172.6, 172.0, 137.9, 136.2, 135.0, 129.6, 129.5, 129.3, 128.9, 128.5, 127.8, 127.5, 126.4, 59.5, 53.1, 38.5, 36.9 ppm.

**HRMS** (ESI, m/z): calculated for  $C_{24}H_{22}N_2OSH^+$ : 387.1531 (M+H)<sup>+</sup>, found: 387.1529.

$[\alpha]^{21}_D = -1.6$  (c = 0.7 in  $CHCl_3$ ).

**HPLC** analysis: 90:10 e.r. (ADH, 15:85 *i*PrOH/Hexane, 0.5 mL/min),  $R_t$  (minor) = 21.2 min,  $R_t$  (major) = 24.9 min.

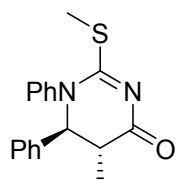

**(5R,6S)-5-methyl-2-(methylthio)-1,6-diphenyl-5,6-dihydropyrimidin-4(1H)-one (5a)**

**Yield:** 27 mg (87%)

**<sup>1</sup>H NMR** (400 MHz,  $CDCl_3$ )  $\delta$  7.39 – 7.23 (m, 6H), 7.20 – 7.14 (m, 2H), 7.11 (d,  $J = 3.1$  Hz, 2H), 4.50 (d,  $J = 4.0$  Hz, 1H), 2.88 (qd,  $J = 7.1, 4.1$  Hz, 1H), 2.47 (s, 3H), 1.44 (d,  $J = 7.1$  Hz, 3H). **<sup>13</sup>C NMR** (100

MHz, CDCl<sub>3</sub>) δ 177.4, 172.7, 140.9, 138.2, 129.7, 129.4, 129.2, 128.7, 126.9, 71.8, 42.9, 17.0, 15.3 ppm.

**HRMS** (ESI, m/z): calculated for C<sub>18</sub>H<sub>18</sub>N<sub>2</sub>O<sup>SH</sup><sup>+</sup>: 311.1218 (M+H)<sup>+</sup>, found: 311.1212.

[α]<sup>21</sup><sub>D</sub> = -26.4 (c = 1.2 in CHCl<sub>3</sub>).

**HPLC** analysis: 91:9 *e.r.* (IA, 15:85 <sup>i</sup>PrOH/Hexane, 0.5 mL/min), R<sub>t</sub> (major) = 20.7 min, R<sub>t</sub> (minor) = 25.4 min.

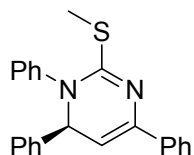

**(S)-2-(methylthio)-1,4,6-triphenyl-1,6-dihydropyrimidine (5b)**

**Yield:** 35 mg (98%)

**<sup>1</sup>H NMR** (400 MHz, CDCl<sub>3</sub>) δ 7.93 – 7.84 (m, 2H), 7.36 (t, *J* = 7.4 Hz, 2H), 7.33 – 7.26 (m, 9H), 7.11 – 7.00 (m, 2H), 5.71 (d, *J* = 5.0 Hz, 1H), 5.30 (d, *J* = 4.9 Hz, 1H), 2.50 (s, 3H). **<sup>13</sup>C NMR** (100 MHz, CDCl<sub>3</sub>) δ 158.7, 143.6, 142.3, 140.6, 138.5, 129.3, 129.2, 128.8, 128.3, 128.3, 128.2, 127.9, 127.7, 125.6, 103.1, 65.8, 14.8 ppm.

**HRMS** (ESI, m/z): calculated for C<sub>23</sub>H<sub>20</sub>N<sub>2</sub>SH<sup>+</sup>: 357.1425 (M+H)<sup>+</sup>, found: 357.1425.

[α]<sup>21</sup><sub>D</sub> = +12.7 (c = 1.4 in CHCl<sub>3</sub>).

**HPLC** analysis: 90:10 *e.r.* (ADH, 3:97 <sup>i</sup>PrOH/Hexane, 0.3 mL/min), R<sub>t</sub> (minor) = 21.1 min, R<sub>t</sub> (major) = 25.2 min.

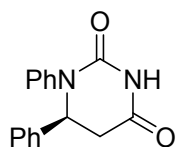

**(S)-1,6-diphenyldihydropyrimidine-2,4(1H,3H)-dione (5c)**

**Yield:** 21.6 mg (81%)

**<sup>1</sup>H NMR** (400 MHz, CDCl<sub>3</sub>) δ 7.90 (s, 1H), 7.43 – 7.29 (m, 5H), 7.28 – 7.14 (m, 5H), 5.08 (dd, *J* = 6.7, 2.6 Hz, 1H), 3.34 (dd, *J* = 16.6, 6.8 Hz, 1H), 2.95 (dd, *J* = 16.6, 2.6 Hz, 1H). **<sup>13</sup>C NMR** (100 MHz, CDCl<sub>3</sub>) δ 168.2, 151.8, 140.7, 138.6, 129.4, 129.3, 128.7, 127.2, 126.0, 125.9, 60.0, 39.4 ppm.

**HRMS** (ESI, m/z): calculated for C<sub>16</sub>H<sub>14</sub>N<sub>2</sub>O<sub>2</sub>H<sup>+</sup>: 267.1134 (M+H)<sup>+</sup>, found: 267.1126.

[α]<sup>21</sup><sub>D</sub> = +139.8 (c = 0.4 in CHCl<sub>3</sub>).

**HPLC** analysis: 91:9 *e.r.* (ADH, 30:70 <sup>i</sup>PrOH/Hexane, 0.5 mL/min), R<sub>t</sub> (minor) = 30.7 min, R<sub>t</sub> (major) = 43.9 min.

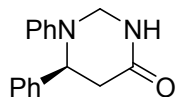

**(S)-1,6-diphenyltetrahydropyrimidin-4(1H)-one (5d)**

**Yield:** 18.4 mg (73%)

**<sup>1</sup>H NMR** (400 MHz, CDCl<sub>3</sub>) δ 7.46 – 7.34 (m, 4H), 7.33 – 7.19 (m, 3H), 6.97 – 6.84 (m, 3H), 6.71 (s, 1H), 4.97 (t, *J* = 5.7 Hz, 1H), 4.81 (dd, *J* = 12.2, 2.9 Hz, 1H), 4.63 (dd, *J* = 12.1, 2.8 Hz, 1H), 2.93 (dd,

$J = 16.4, 6.4$  Hz, 1H), 2.76 (dd,  $J = 16.4, 5.0$  Hz, 1H).  $^{13}\text{C}$  NMR (100 MHz,  $\text{CDCl}_3$ )  $\delta$  171.2, 148.3, 141.0, 129.6, 129.1, 127.9, 126.6, 120.8, 116.6, 59.6, 56.0, 36.9 ppm.

HRMS (ESI,  $m/z$ ): calculated for  $\text{C}_{16}\text{H}_{16}\text{N}_2\text{OH}^+$ : 253.1341 ( $M+H$ ) $^+$ , found: 253.1341.

$[\alpha]^{21}_D = +94.8$  ( $c = 0.8$  in  $\text{CHCl}_3$ ).

HPLC analysis: 93:7 *e.r.* (ADH, 20:80 *i*PrOH/Hexane, 0.5 mL/min),  $R_t$  (major) = 16.3 min,  $R_t$  (minor) = 17.9 min.

## II. $^1\text{H}$ , $^{13}\text{C}$ NMR and HPLC Spectra

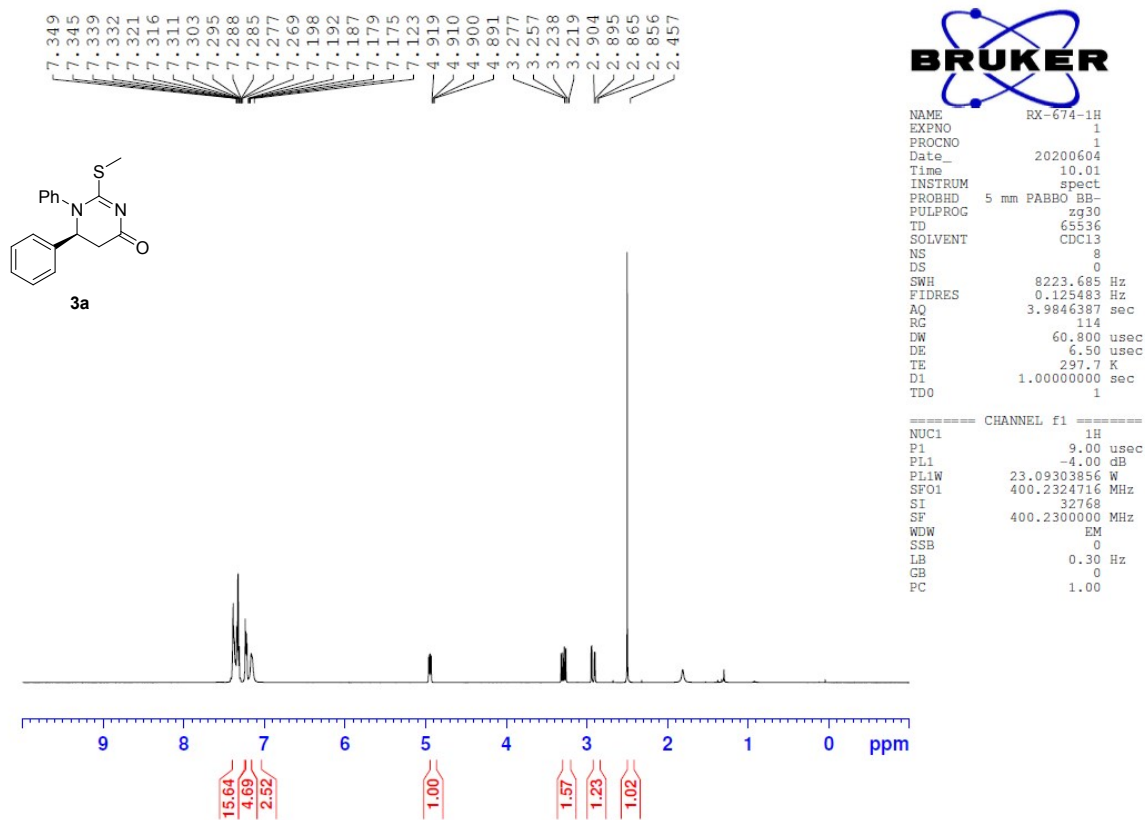

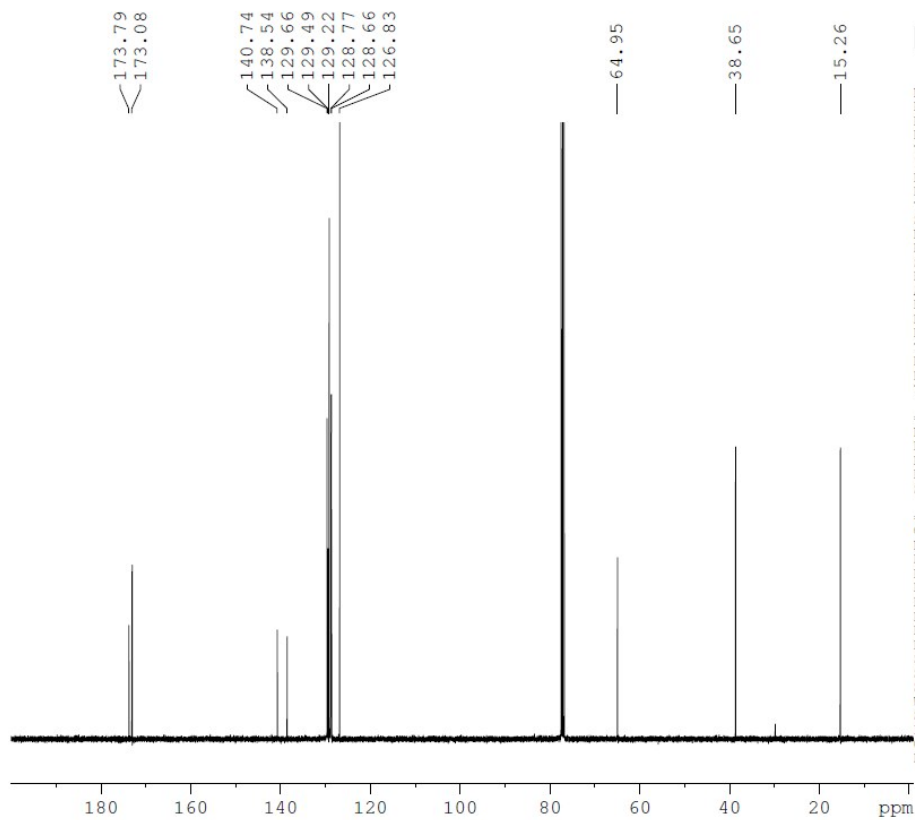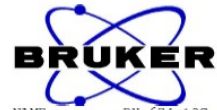

```

NAME      RX-674-13C
EXPNO    1
PROCNO   1
Date_    20200604
Time     10.06
INSTRUM  spect
PROBHD   5 mm PABBO BB-
PULPROG  zgpg30
TD       65536
SOLVENT  CDC13
NS       3621
DS       4
SWH      25252.525 Hz
FIDRES   0.385323 Hz
AQ       1.2976629 sec
RG       22.6
DW       19.800 usec
DE       6.50 usec
TE       298.5 K
D1       2.0000000 sec
D11      0.0300000 sec
TD0      100
  
```

```

===== CHANNEL f1 =====
NUC1     13C
P1       10.00 usec
PL1      -2.00 dB
PL1W     59.71607590 W
SFO1     100.6499905 MHz
  
```

```

===== CHANNEL f2 =====
CPDPRG2  waltz16
NUC2     1H
PCPD2    80.00 usec
PL2      -4.00 dB
PL12     14.98 dB
PL13     13.89 dB
PL1W     23.09303856 W
PL12W    0.29206610 W
PL13W    0.37538856 W
SFO2     400.2316009 MHz
SI       32768
SF       100.6379047 MHz
WDW      no
SSB      0
LB       0.00 Hz
GB       0
PC       1.40
  
```

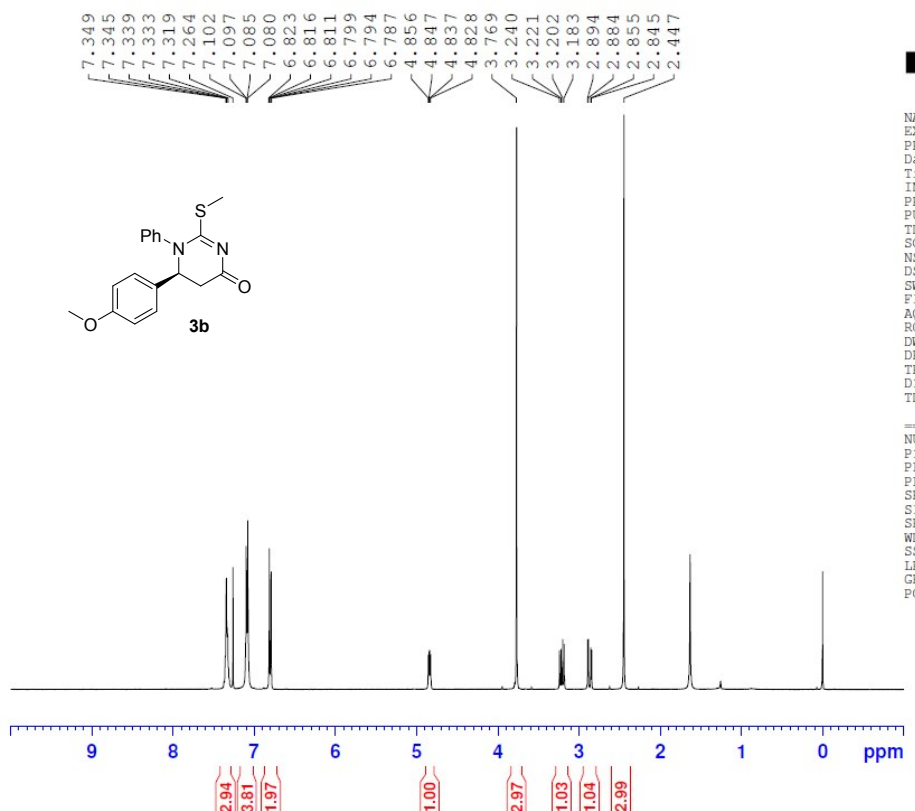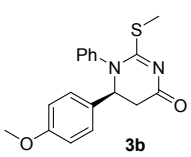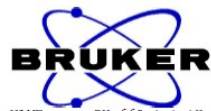

```

NAME      RX-663-1-1-1H
EXPNO    1
PROCNO   1
Date_    20191119
Time     18.59
INSTRUM  spect
PROBHD   5 mm PABBO BB-
PULPROG  zg30
TD       65536
SOLVENT  CDC13
NS       8
DS       0
SWH      8223.685 Hz
FIDRES   0.125483 Hz
AQ       3.9846387 sec
RG       181
DW       60.800 usec
DE       6.50 usec
TE       299.8 K
D1       1.0000000 sec
TD0      1
  
```

```

===== CHANNEL f1 =====
NUC1     1H
P1       9.00 usec
PL1      -4.00 dB
PL1W     23.09303856 W
SFO1     400.2324716 MHz
SI       32768
SF       400.2300189 MHz
WDW      EM
SSB      0
LB       0.30 Hz
GB       0
PC       1.00
  
```



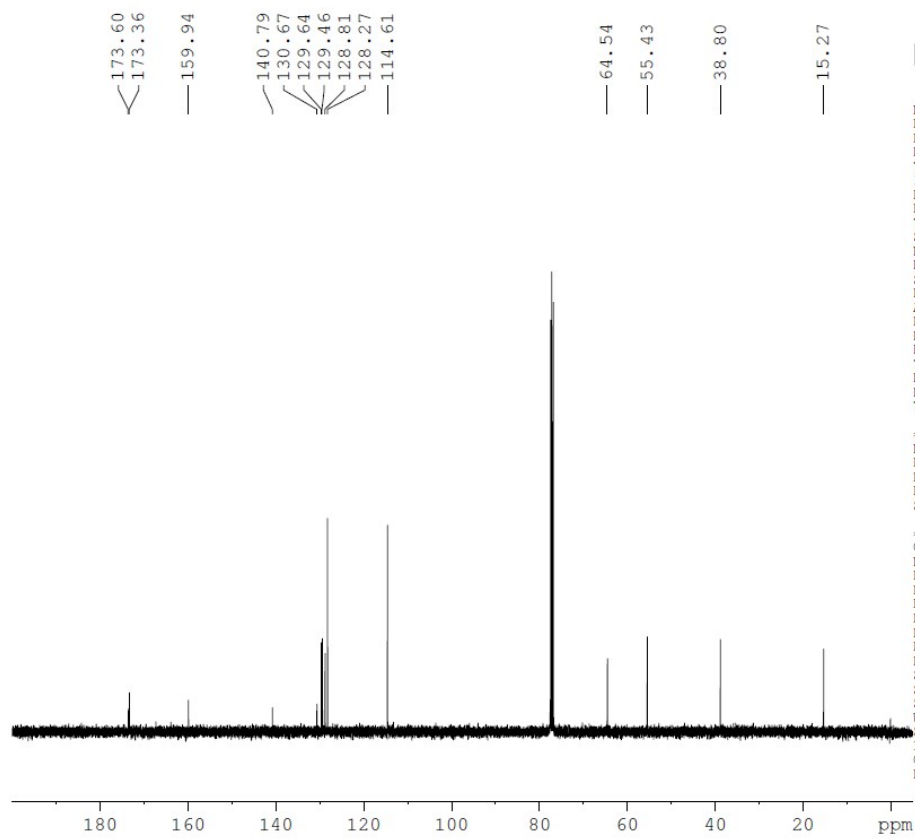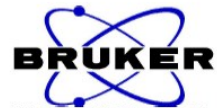

```

NAME          RX-663-1-1-13C
EXPNO         1
PROCNO        1
Date_         20191119
Time_         19.08
INSTRUM       spect
PROBHD        5 mm PABBO BB-
PULPROG       zgpg30
TD            65536
SOLVENT       CDCl3
NS            712
DS            4
SWH           25252.525 Hz
FIDRES        0.385323 Hz
AQ            1.2976629 sec
RG            25.4
DW            19.800 usec
DE            6.50 usec
TE            300.7 K
D1            2.00000000 sec
D11           0.03000000 sec
TD0           100

===== CHANNEL f1 =====
NUC1           13C
P1            10.00 usec
PL1           -2.00 dB
PL1W          59.71607590 W
SFO1          100.6499905 MHz

===== CHANNEL f2 =====
CPDPRG2       waltz16
NUC2           1H
PCPD2         80.00 usec
PL2           -4.00 dB
PL12          14.98 dB
PL13          13.89 dB
PL2W          23.09303856 W
PL12W         0.29206610 W
PL13W         0.37538856 W
SFO2          400.2316009 MHz
SI            32768
SF            100.6378992 MHz
WDW           no
SSB           0
LB            0.00 Hz
GB            0
PC            1.40

```

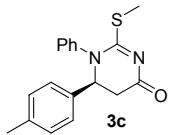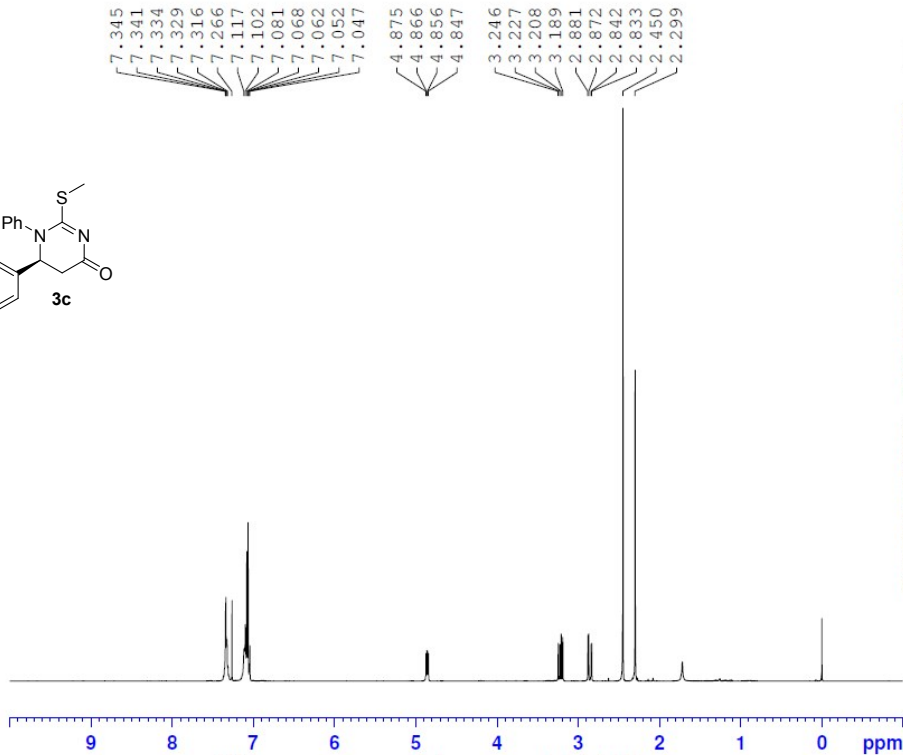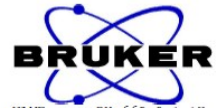

```

NAME      RX-663-2-1-1H
EXPNO     1
PROCNO    1
Date_     20191119
Time      19.47
INSTRUM   spect
PROBHD    5 mm PABBO BB-
PULPROG   zg30
TD         65536
SOLVENT   CDCl3
NS         8
DS         0
SWH       8223.685 Hz
FIDRES    0.125483 Hz
AQ         3.9846387 sec
RG         128
DW         60.800 usec
DE         6.50 usec
TE         300.2 K
D1         1.00000000 sec
TD0        1
  
```

```

===== CHANNEL f1 =====
NUC1      1H
P1         9.00 usec
PL1       -4.00 dB
PL1W      23.09303856 W
SFO1      400.2324716 MHz
SI         32768
SF         400.2300180 MHz
WDW        no
SSB        0
LB         0.00 Hz
GB         0
PC         1.00
  
```

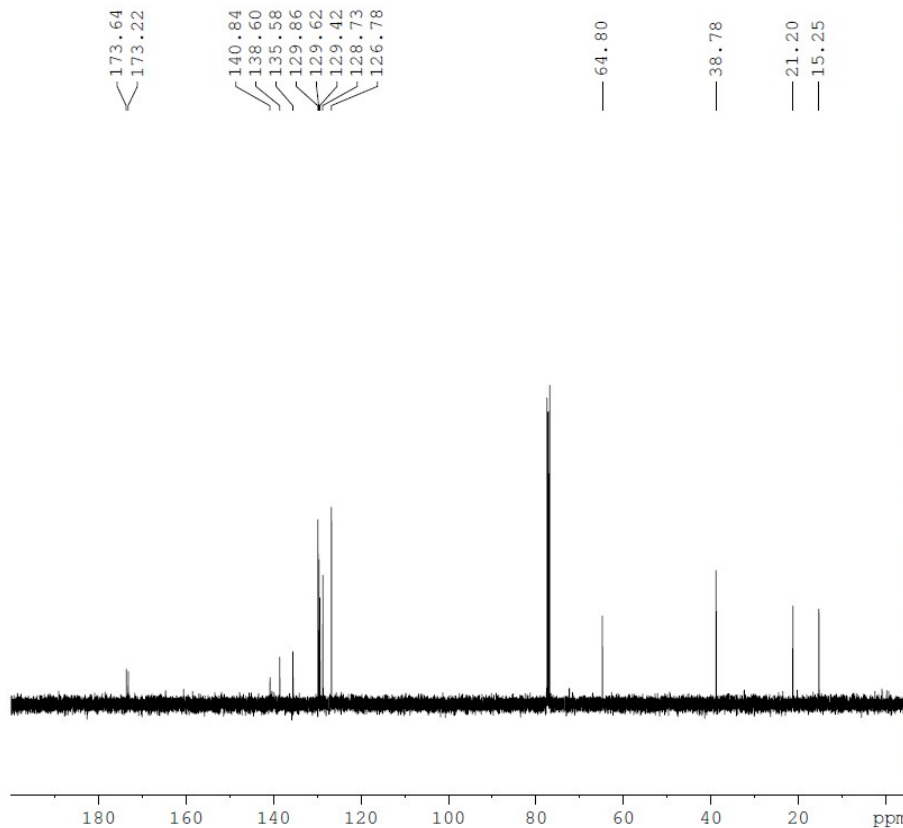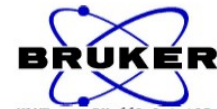

```

NAME      RX-663-2-1-13C
EXPNO     1
PROCNO    1
Date_     20191119
Time      19.57
INSTRUM   spect
PROBHD    5 mm PABBO BB-
PULPROG   zgpg30
TD         65536
SOLVENT   CDCl3
NS         198
DS         4
SWH       25252.525 Hz
FIDRES    0.385323 Hz
AQ         1.2976629 sec
RG         25.4
DW         19.800 usec
DE         6.50 usec
TE         300.9 K
D1         2.00000000 sec
D11        0.03000000 sec
TD0        100
  
```

```

===== CHANNEL f1 =====
NUC1      13C
P1        10.00 usec
PL1       -2.00 dB
PL1W      59.71607590 W
SFO1      100.6499905 MHz

===== CHANNEL f2 =====
CPDPRG2   waltz16
NUC2      1H
PCPD2     90.00 usec
PL2       -4.00 dB
PL12      14.98 dB
PL13      13.89 dB
PL2W      23.09303856 W
PL12W     0.29206610 W
PL13W     0.37538856 W
SFO2      400.2316009 MHz
SI         32768
SF         100.6379019 MHz
WDW        no
SSB        0
LB         0.00 Hz
GB         0
PC         1.40
  
```

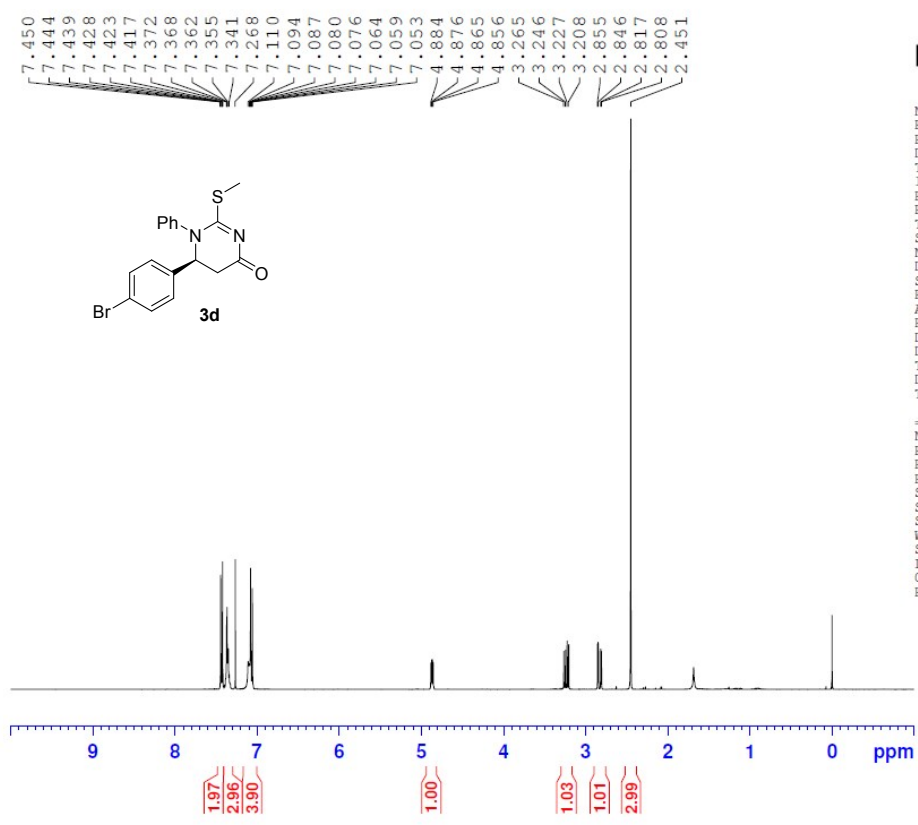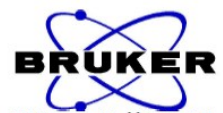

```

NAME RX-663-3-1-1H
EXPNO 1
PROCNO 1
Date_ 20191119
Time 20.07
INSTRUM spect
PROBHD 5 mm PABBO BB-
PULPROG zg30
TD 65536
SOLVENT CDCl3
NS 8
DS 0
SWH 8223.685 Hz
FIDRES 0.125483 Hz
AQ 3.9846387 sec
RG 144
DW 60.800 usec
DE 6.50 usec
TE 300.1 K
D1 1.00000000 sec
TDO 1

===== CHANNEL f1 =====
NUC1 1H
P1 9.00 usec
PL1 -4.00 dB
PL1W 23.09303856 W
SFO1 400.2324716 MHz
SI 32768
SF 400.2300174 MHz
WDW no
SSB 0
LB 0.00 Hz
GB 0
PC 1.00
  
```

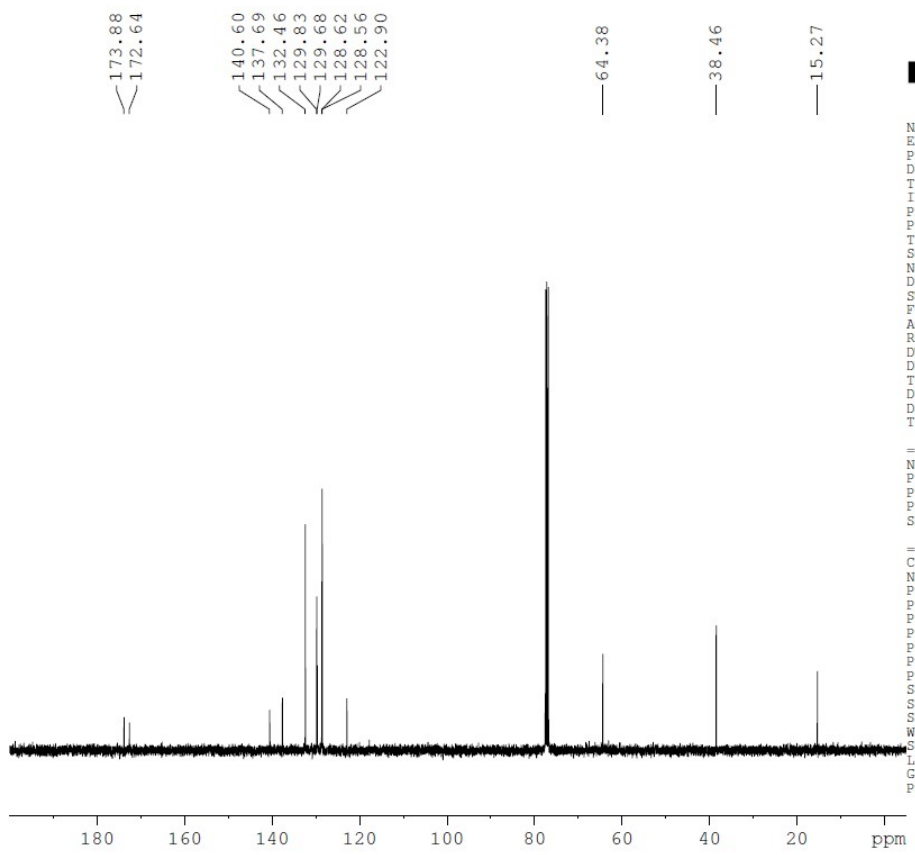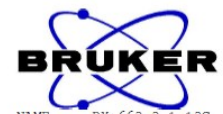

```

NAME RX-663-3-1-13C
EXPNO 1
PROCNO 1
Date_ 20191119
Time 20.09
INSTRUM spect
PROBHD 5 mm PABBO BB-
PULPROG zgpg30
TD 65536
SOLVENT CDCl3
NS 196
DS 4
SWH 25252.525 Hz
FIDRES 0.385323 Hz
AQ 1.2976629 sec
RG 25.4
DW 19.800 usec
DE 6.50 usec
TE 300.3 K
D1 2.00000000 sec
D11 0.03000000 sec
TDO 100

===== CHANNEL f1 =====
NUC1 13C
P1 10.00 usec
PL1 -2.00 dB
PL1W 59.71607590 W
SFO1 100.6499905 MHz

===== CHANNEL f2 =====
CPDPRG2 waltz16
NUC2 1H
PCPD2 80.00 usec
PL2 -4.00 dB
PL12 14.98 dB
PL13 13.89 dB
PL2W 23.09303856 W
PL12W 0.29206610 W
PL13W 0.37538856 W
SFO2 400.2316009 MHz
SI 32768
SF 100.6379016 MHz
WDW EM
SSB 0
LB 1.00 Hz
GB 0
PC 1.40
  
```

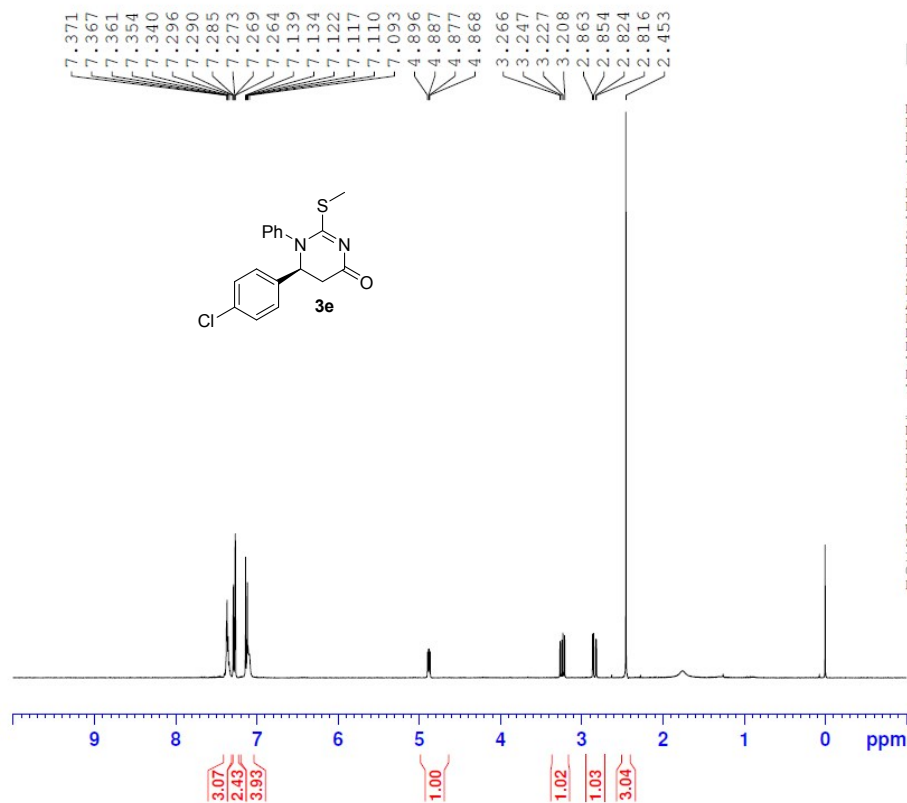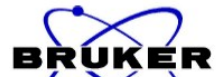

```

NAME      RX-663-4-1-1H
EXPNO     1
PROCNO    1
Date_     20191119
Time      20.24
INSTRUM   spect
PROBHD    5 mm PABBO BB-
PULPROG   zg30
TD         65536
SOLVENT   CDCl3
NS         8
DS         0
SWH        8223.685 Hz
FIDRES     0.125483 Hz
AQ         3.9846387 sec
RG         161
DW         60.800 usec
DE         6.50 usec
TE         300.0 K
D1         1.00000000 sec
TDO        1
  
```

```

===== CHANNEL f1 =====
NUC1      1H
P1        9.00 usec
PL1       -4.00 dB
PL1W      23.09303856 W
SFO1      400.2324716 MHz
SI        32768
SF        400.2300190 MHz
WDW       no
SSB       0
LB        0.00 Hz
GB        0
PC        1.00
  
```

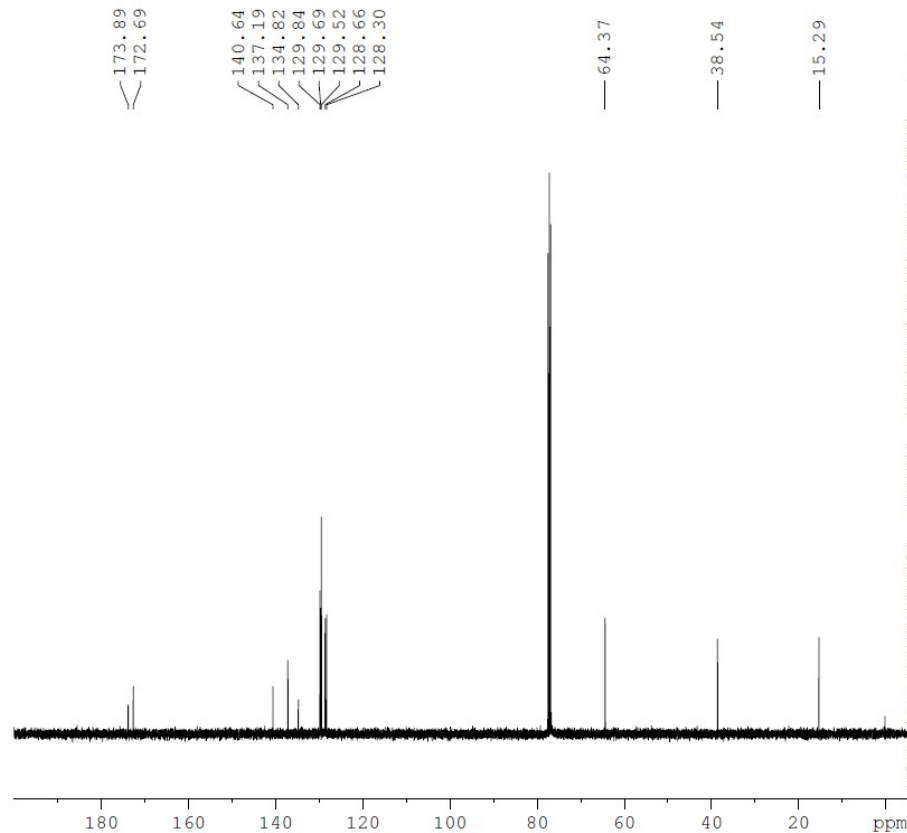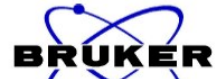

```

NAME      RX-663-4-1-13C
EXPNO     1
PROCNO    1
Date_     20191119
Time      20.31
INSTRUM   spect
PROBHD    5 mm PABBO BB-
PULPROG   zgpg30
TD         65536
SOLVENT   CDCl3
NS         986
DS         4
SWH        25252.525 Hz
FIDRES     0.385323 Hz
AQ         1.2976629 sec
RG         25.4
DW         19.800 usec
DE         6.50 usec
TE         300.9 K
D1         2.00000000 sec
D11        0.03000000 sec
TDO        100
  
```

```

===== CHANNEL f1 =====
NUC1      13C
P1        10.00 usec
PL1       -2.00 dB
PL1W      59.71607590 W
SFO1      100.6499905 MHz
  
```

```

===== CHANNEL f2 =====
CPDPRG2   waltz16
NUC2      1H
PCPD2     80.00 usec
PL2       -4.00 dB
PL12      14.98 dB
PL13      13.89 dB
PL2W      23.09303856 W
PL12W     0.29206610 W
PL13W     0.37538956 W
SFO2      400.2316009 MHz
SI        32768
SF        100.6378992 MHz
WDW       no
SSB       0
LB        0.00 Hz
GB        0
PC        1.40
  
```

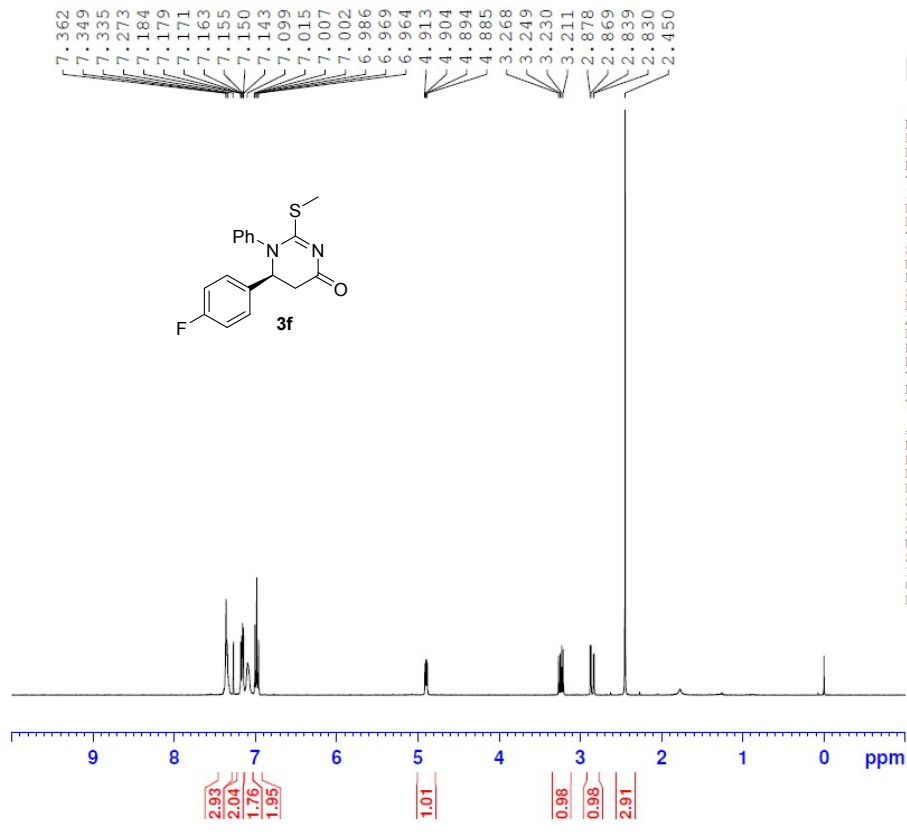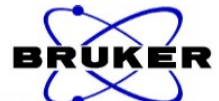

```

NAME      RX-665-1-1-1H
EXPNO     1
PROCNO    1
Date_     20191118
Time      11.21
INSTRUM   spect
PROBHD    5 mm PABBO BB-
PULPROG   zg30
TD         65536
SOLVENT   CDCl3
NS         8
DS         0
SWH        8223.685 Hz
FIDRES     0.125483 Hz
AQ         3.9846387 sec
RG         114
DW         60.800 usec
DE         6.50 usec
TE         298.7 K
D1         1.00000000 sec
TD0        1
  
```

```

===== CHANNEL f1 =====
NUC1      1H
P1         9.00 usec
PL1        -4.00 dB
PL1W      23.09303856 W
SFO1      400.2324716 MHz
SI         32768
SF         400.2300149 MHz
WDW        no
SSB        0
LB         0.00 Hz
GB         0
PC         1.00
  
```

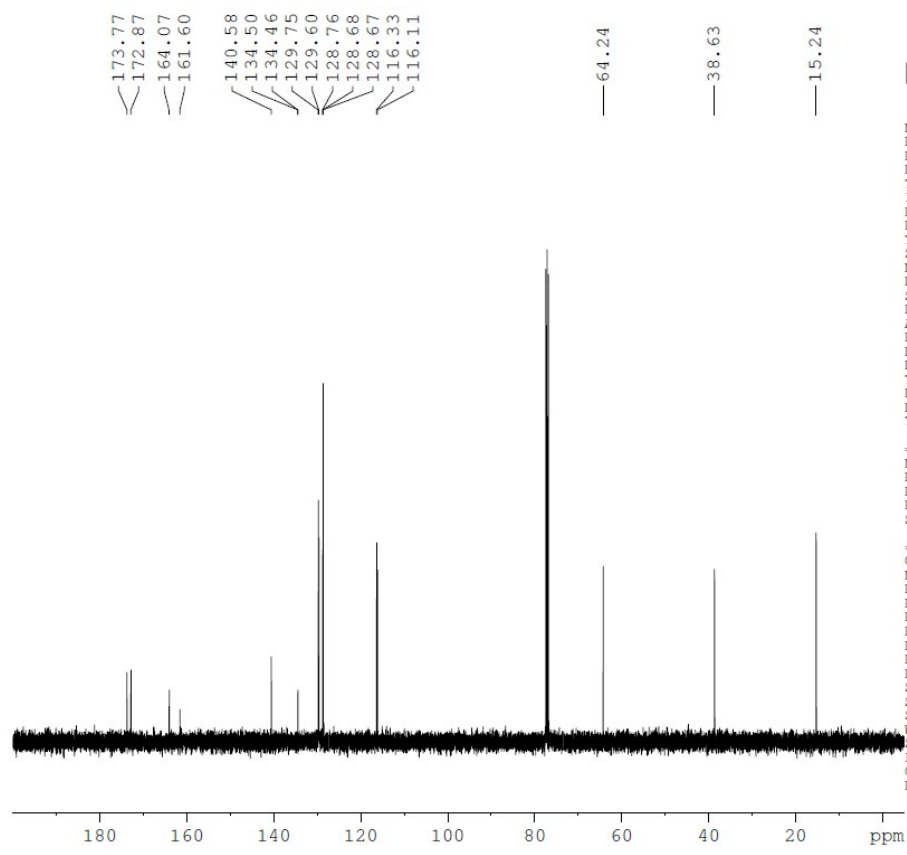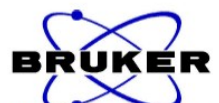

```

NAME      RX-665-1-1-13C
EXPNO     1
PROCNO    1
Date_     20191118
Time      11.31
INSTRUM   spect
PROBHD    5 mm PABBO BB-
PULPROG   zgpg30
TD         65536
SOLVENT   CDCl3
NS         230
DS         4
SWH        25252.525 Hz
FIDRES     0.385323 Hz
AQ         1.2976629 sec
RG         25.4
DW         19.800 usec
DE         6.50 usec
TE         300.0 K
D1         2.00000000 sec
D11        0.03000000 sec
TD0        100
  
```

```

===== CHANNEL f1 =====
NUC1      13C
P1         10.00 usec
PL1        -2.00 dB
PL1W      59.71607590 W
SFO1      100.6499905 MHz
  
```

```

===== CHANNEL f2 =====
CPDPRG2   waltz16
NUC2      1H
PCPD2     80.00 usec
PL2        -4.00 dB
PL12      14.98 dB
PL13      13.89 dB
PL2W      23.09303856 W
PL12W     0.29206610 W
PL13W     0.37538856 W
SFO2      400.2316009 MHz
SI         32768
SF         100.6379031 MHz
WDW        no
SSB        0
LB         0.00 Hz
GB         0
PC         1.40
  
```

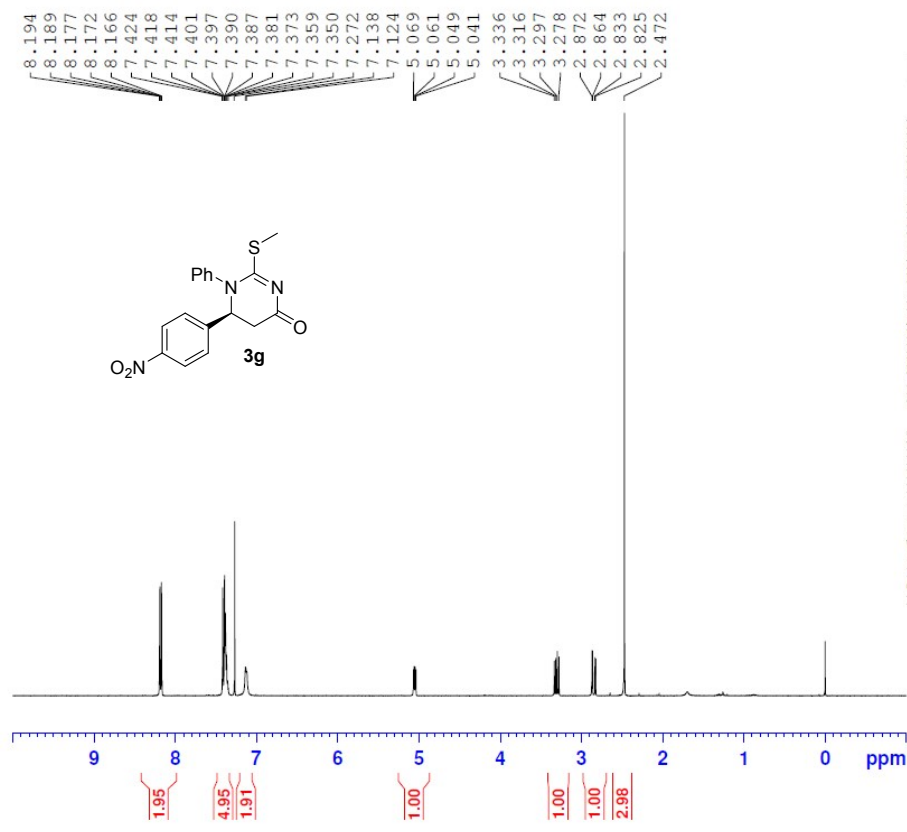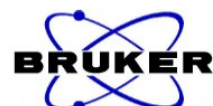

```

NAME      RX-665-3-1-1H
EXPNO     1
PROCNO    1
Date_     20191118
Time      12.06
INSTRUM   spect
PROBHD    5 mm PABBO BB-
PULPROG   zg30
TD         65536
SOLVENT   CDC13
NS         8
DS         0
SWH        8223.685 Hz
FIDRES     0.125483 Hz
AQ         3.9846387 sec
RG         114
DW         60.800 usec
DE         6.50 usec
TE         299.4 K
D1         1.00000000 sec
TD0        1
  
```

```

===== CHANNEL f1 =====
NUC1      1H
P1         9.00 usec
PL1        -4.00 dB
PL1W      23.09303856 W
SFO1      400.2324716 MHz
SI         32768
SF         400.2300153 MHz
WDW        no
SSB         0
LB         0.00 Hz
GB         0
PC         1.00
  
```

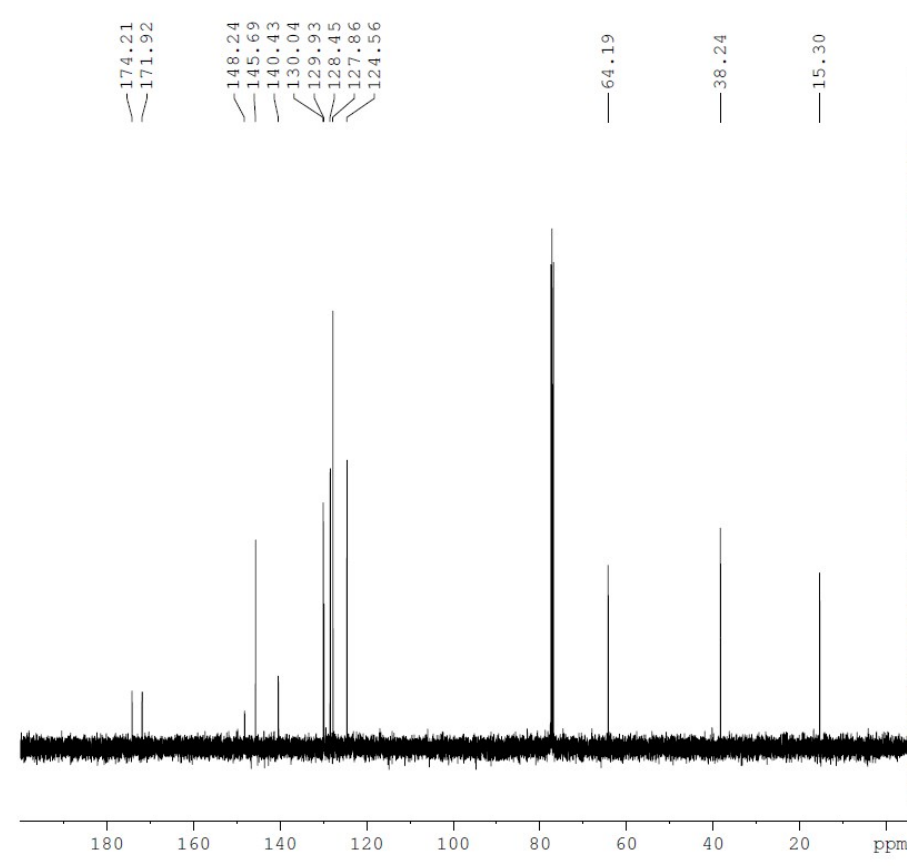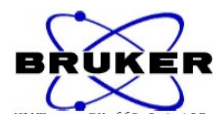

```

NAME      RX-665-3-1-13C
EXPNO     1
PROCNO    1
Date_     20191118
Time      12.10
INSTRUM   spect
PROBHD    5 mm PABBO BB-
PULPROG   zgpg30
TD         65536
SOLVENT   CDC13
NS         200
DS         4
SWH        25252.525 Hz
FIDRES     0.385323 Hz
AQ         1.2976629 sec
RG         25.4
DW         19.800 usec
DE         6.50 usec
TE         299.5 K
D1         2.00000000 sec
D11        0.03000000 sec
TD0        100
  
```

```

===== CHANNEL f1 =====
NUC1      13C
P1         10.00 usec
PL1        -2.00 dB
PL1W      59.71607590 W
SFO1      100.6499905 MHz

===== CHANNEL f2 =====
CPDPRG2   waltz16
NUC2      1H
PCPD2     80.00 usec
PL2        -4.00 dB
PL12      14.98 dB
PL13      13.89 dB
PL2W      23.09303856 W
PL12W     0.29206610 W
PL13W     0.37538856 W
SFO2      400.2316009 MHz
SI         32768
SF         100.6379023 MHz
WDW        no
SSB         0
LB         0.00 Hz
GB         0
PC         1.40
  
```

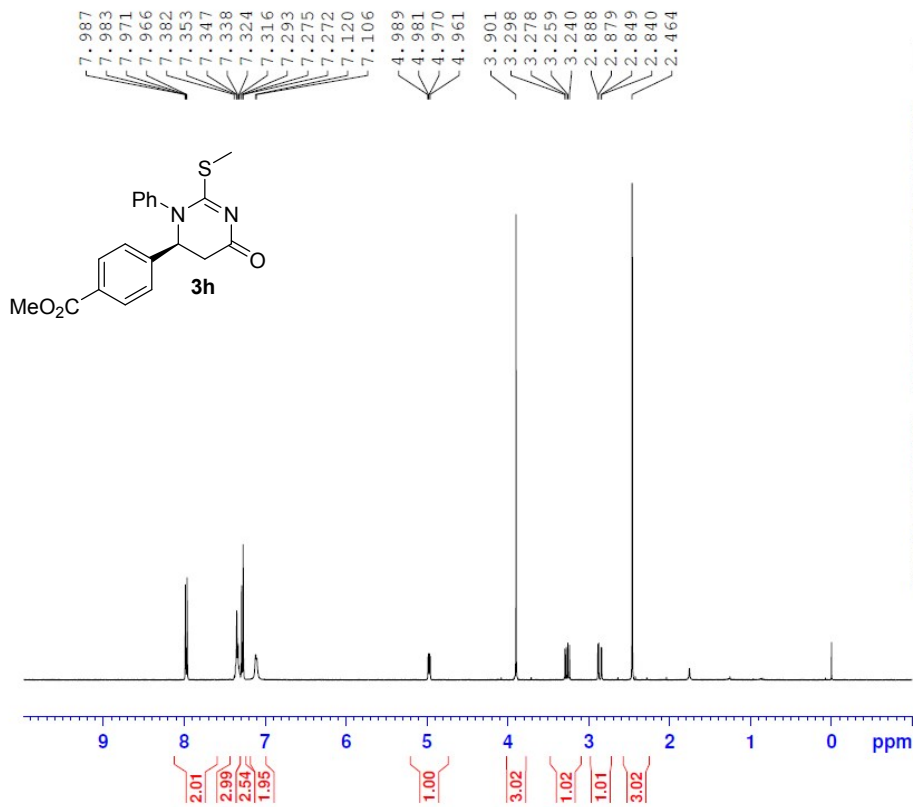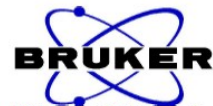

```

NAME      RX-665-5-1-1H
EXPNO     1
PROCNO    1
Date_     20191118
Time      12.26
INSTRUM   spect
PROBHD    5 mm PABBO BB-
PULPROG   zg30
TD         65536
SOLVENT   CDC13
NS         8
DS         0
SWH       8223.685 Hz
FIDRES    0.125483 Hz
AQ         3.9846387 sec
RG         101
DW         60.800 usec
DE         6.50 usec
TE         293.5 K
D1         1.0000000 sec
TD0        1

```

```

===== CHANNEL f1 =====
NUC1      1H
P1         9.00 usec
PL1        -4.00 dB
PL1W      23.09303956 W
SFO1      400.2324716 MHz
SI         32768
SF         400.2300140 MHz
WDW        no
SSB        0
LB         0.00 Hz
GB         0
PC         1.00

```

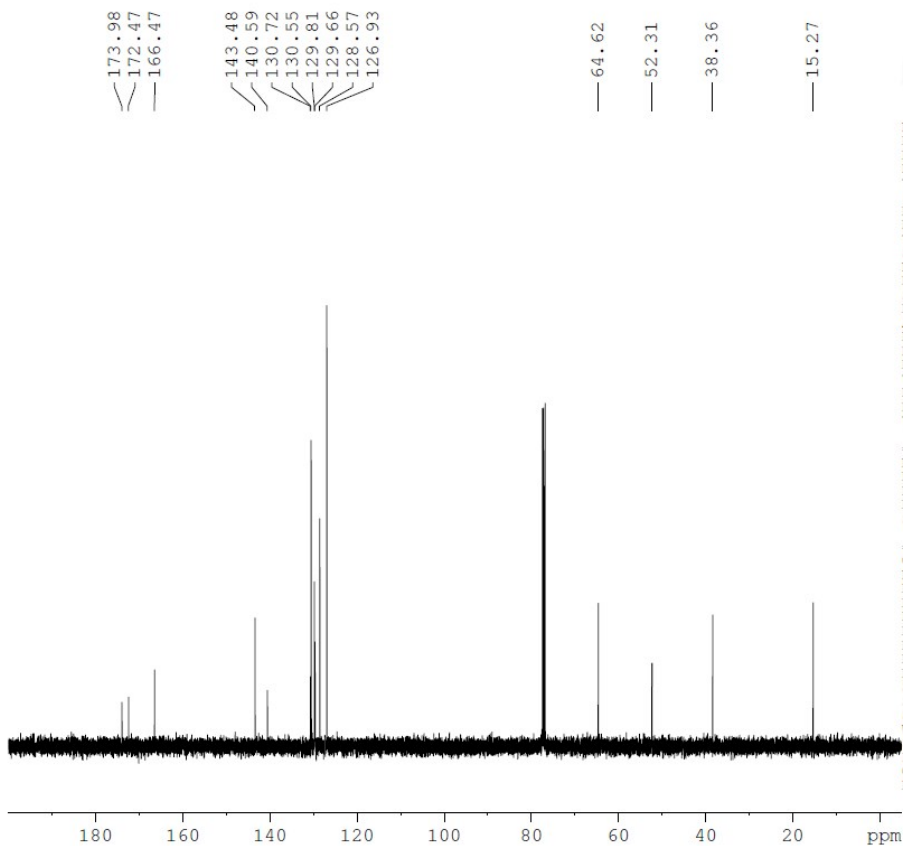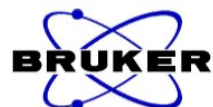

```

NAME      RX-665-5-1-13C
EXPNO     1
PROCNO    1
Date_     20191118
Time      12.36
INSTRUM   spect
PROBHD    5 mm PABBO BB-
PULPROG   zgpg30
TD         65536
SOLVENT   CDC13
NS         177
DS         4
SWH       25252.525 Hz
FIDRES    0.385323 Hz
AQ         1.2976629 sec
RG         22.6
DW         19.800 usec
DE         6.50 usec
TE         300.3 K
D1         2.00000000 sec
D11        0.03000000 sec
TD0        100

```

```

===== CHANNEL f1 =====
NUC1      13C
P1        10.00 usec
PL1        -2.00 dB
PL1W      59.71607590 W
SFO1      100.6499905 MHz

```

```

===== CHANNEL f2 =====
CPDPRG2   waltz16
NUC2      1H
PCPD2     80.00 usec
PL2        -4.00 dB
PL12       14.98 dB
PL13       13.89 dB
PL2W      23.09303956 W
PL12W     0.29206610 W
PL13W     0.37538856 W
SFO2      400.2316009 MHz
SI         32768
SF         100.6379030 MHz
WDW        no
SSB        0
LB         0.00 Hz
GB         0
PC         1.40

```

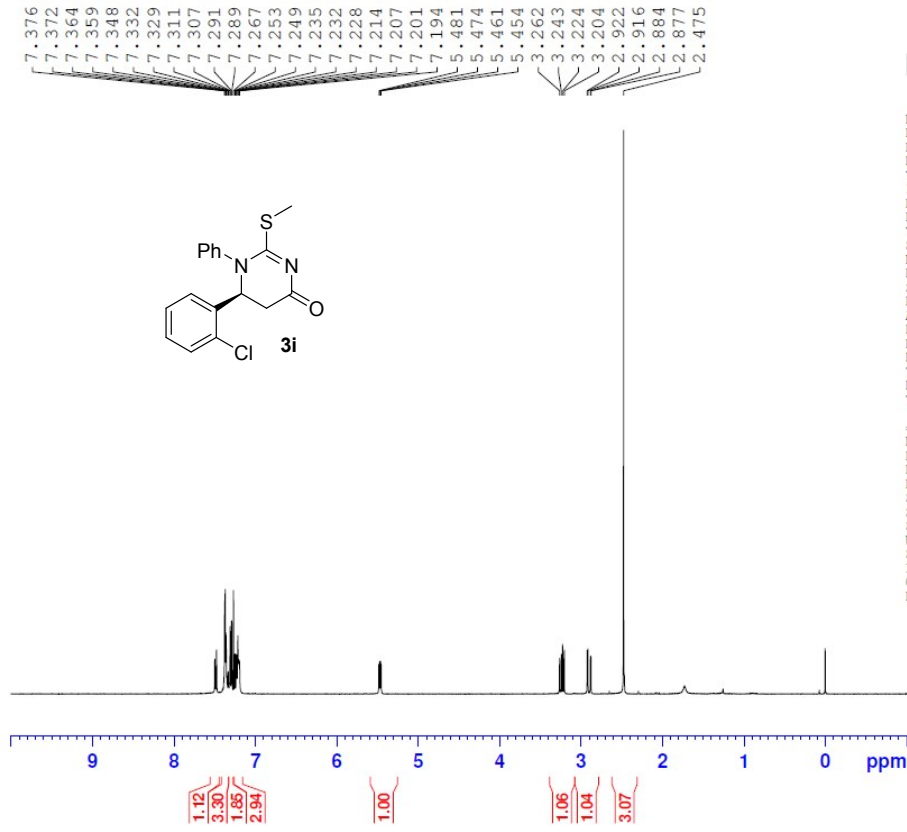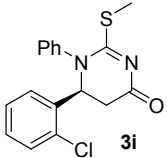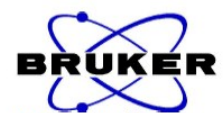

```

NAME      RX-667-4-1-1H
EXPNO    1
PROCNO   1
Date_    20191118
Time     12.46
INSTRUM  spect
PROBHD   5 mm PABBO BB-
PULPROG  zg30
TD        65536
SOLVENT  CDC13
NS        8
DS        0
SWH      8223.685 Hz
FIDRES   0.125483 Hz
AQ       3.9846387 sec
RG        114
DW       60.800 usec
DE       6.50 usec
TE       299.5 K
D1       1.00000000 sec
TD0      1
  
```

```

===== CHANNEL f1 =====
NUC1     1H
P1       9.00 usec
PL1     -4.00 dB
PL1W    23.09303856 W
SFO1    400.2324716 MHz
SI       32768
SF      400.2300172 MHz
WDW      no
SSB      0
LB       0.00 Hz
GB       0
PC       1.00
  
```

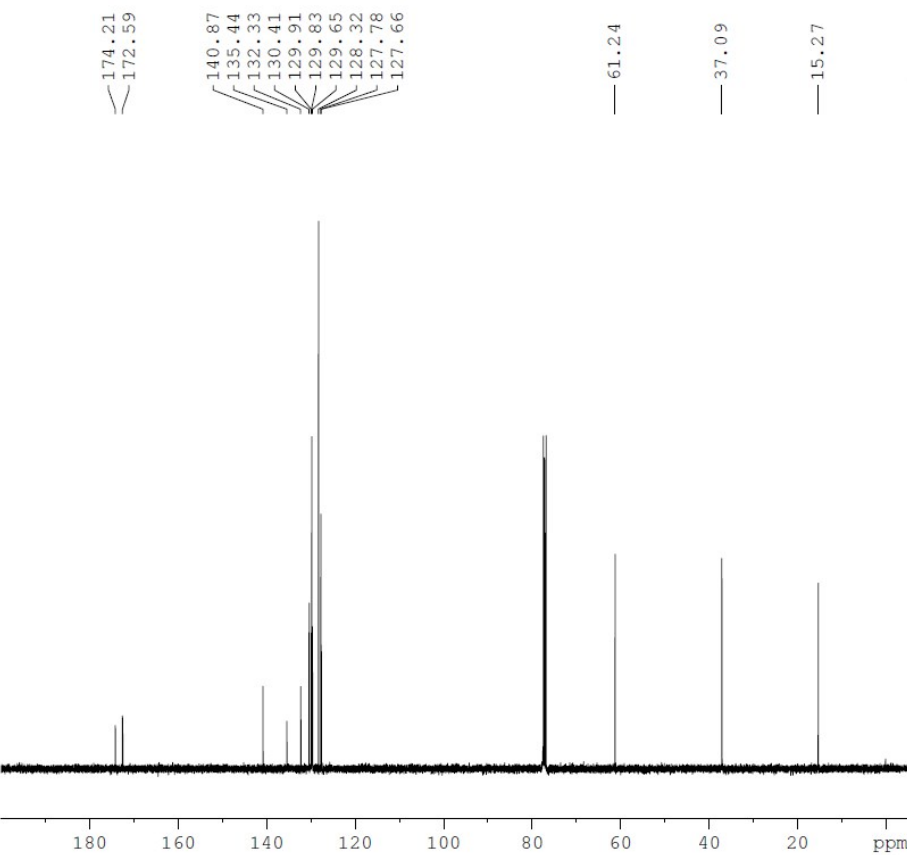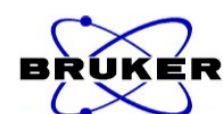

```

NAME      RX-667-4-1-13C
EXPNO    1
PROCNO   1
Date_    20191118
Time     12.56
INSTRUM  spect
PROBHD   5 mm PABBO BB-
PULPROG  zgpg30
TD        65536
SOLVENT  CDC13
NS       1231
DS        4
SWH     25252.525 Hz
FIDRES  0.385323 Hz
AQ      1.2976629 sec
RG       22.6
DW      19.800 usec
DE      6.50 usec
TE      300.4 K
D1      2.00000000 sec
D11     0.03000000 sec
TD0     100
  
```

```

===== CHANNEL f1 =====
NUC1     13C
P1      10.00 usec
PL1     -2.00 dB
PL1W    59.71607590 W
SFO1    100.6499905 MHz
  
```

```

===== CHANNEL f2 =====
CPDPRG2  waltz16
NUC2     1H
PCPD2   80.00 usec
PL2     -4.00 dB
PL12    14.98 dB
PL13    13.89 dB
PL2W    23.09303856 W
PL12W   0.29206610 W
PL13W   0.37538856 W
SFO2    400.2316009 MHz
SI       32768
SF     100.6379021 MHz
WDW      no
SSB      0
LB       0.00 Hz
GB       0
PC       1.40
  
```



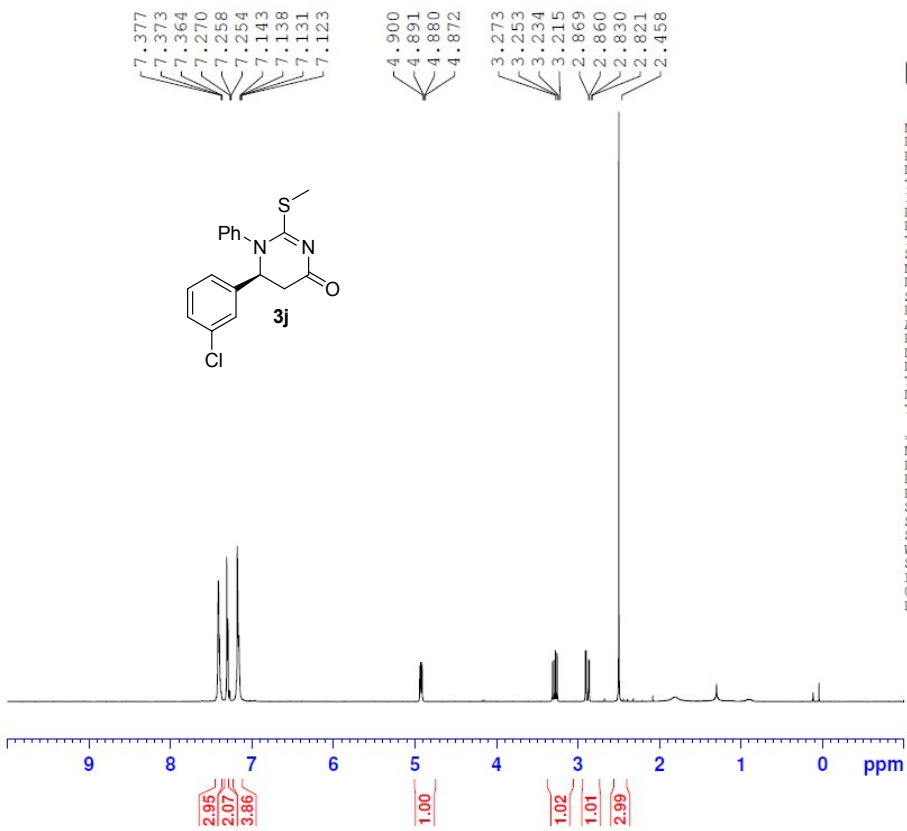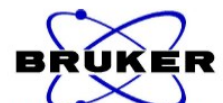

```

NAME      RX-713-3-1HNMR
EXPNO     1
PROCNO    1
Date_     20200114
Time      20.12
INSTRUM   spect
PROBHD    5 mm PABBO BB-
PULPROG   zg30
TD         65536
SOLVENT   CDCl3
NS         8
DS         0
SWH        8223.685 Hz
FIDRES    0.125483 Hz
AQ         3.9846387 sec
RG         114
DW         60.800 usec
DE         6.50 usec
TE         299.4 K
D1         1.0000000 sec
D11
TDO        1

```

```

===== CHANNEL f1 =====
NUC1      1H
P1         9.00 usec
PL1        -4.00 dB
PL1W      23.09303856 W
SFO1      400.2324716 MHz
SI         32768
SF         400.2300000 MHz
WDW        no
SSB        0
LB         0.00 Hz
GB         0
PC         1.00

```

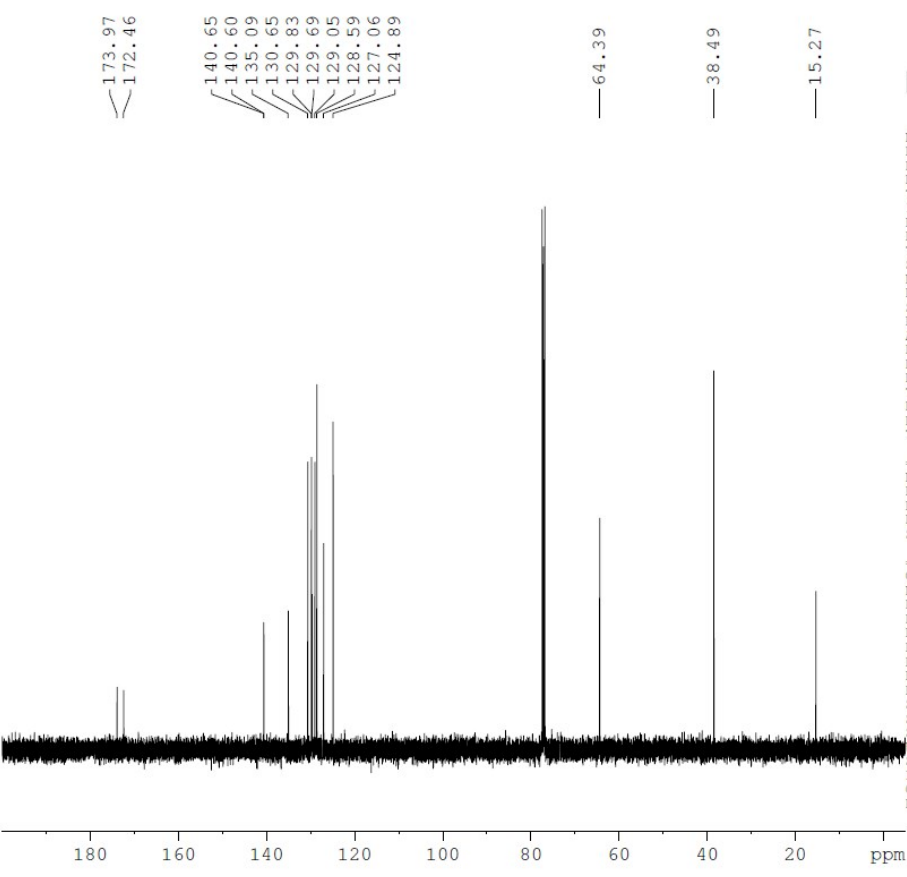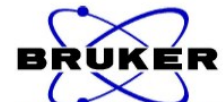

```

NAME      RX-713-3-13CNMR
EXPNO     1
PROCNO    1
Date_     20200114
Time      20.21
INSTRUM   spect
PROBHD    5 mm PABBO BB-
PULPROG   zgpg30
TD         65536
SOLVENT   CDCl3
NS         256
DS         4
SWH        25252.525 Hz
FIDRES    0.385323 Hz
AQ         1.2976629 sec
RG         32
DW         19.800 usec
DE         6.50 usec
TE         300.2 K
D1         2.0000000 sec
D11        0.0300000 sec
TDO        100

```

```

===== CHANNEL f1 =====
NUC1      13C
P1        10.00 usec
PL1        -2.00 dB
PL1W      59.71607590 W
SFO1      100.6499905 MHz

===== CHANNEL f2 =====
CPDPRG2   waltz16
NUC2      1H
PCPD2     80.00 usec
PL2        -4.00 dB
PL12      14.98 dB
PL13      13.89 dB
PL2W      23.09303856 W
PL12W     0.29206610 W
PL13W     0.37538856 W
SFO2      400.2316009 MHz
SI         32768
SF         100.6379025 MHz
WDW        no
SSB        0
LB         0.00 Hz
GB         0
PC         1.40

```

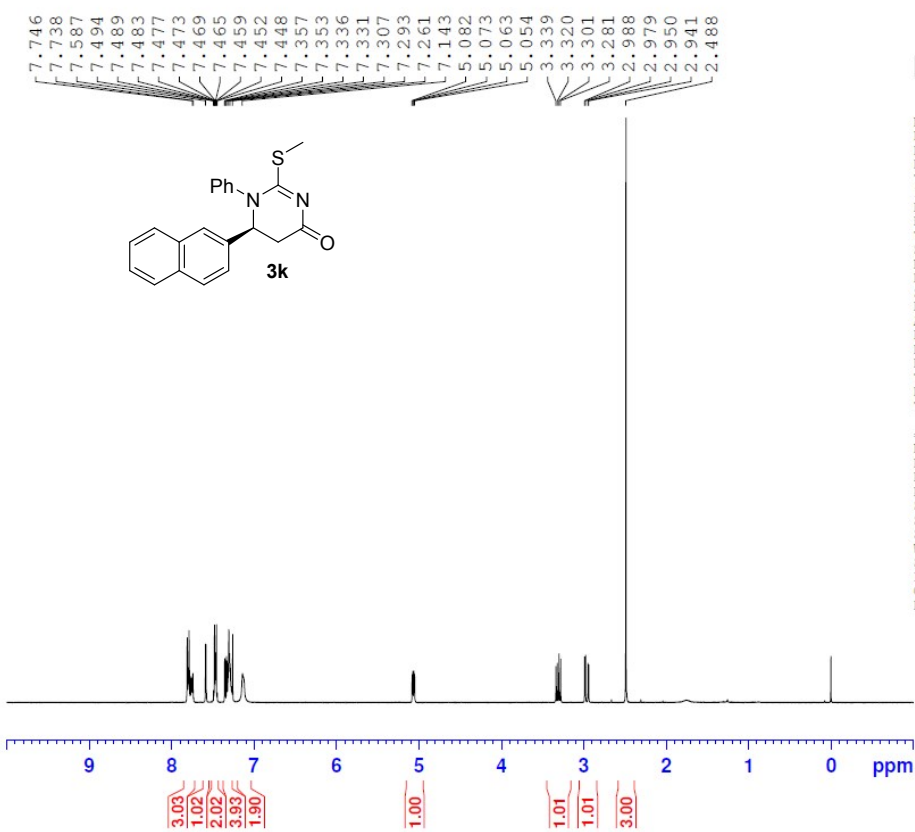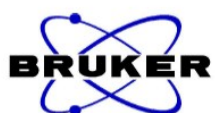

```

NAME      RX-665-2-1-1H
EXPNO     1
PROCNO    1
Date_     20191118
Time      11.47
INSTRUM   spect
PROBHD    5 mm PABBO BB-
PULPROG   zg30
TD         65536
SOLVENT   CDC13
NS         8
DS         0
SWH       8223.685 Hz
FIDRES    0.125483 Hz
AQ         3.9846387 sec
RG         101
DW         60.800 usec
DE         6.50 usec
TE         299.2 K
D1         1.00000000 sec
TD0        1
  
```

```

===== CHANNEL f1 =====
NUC1      1H
P1         9.00 usec
PL1        -4.00 dB
PL1W      23.09303856 W
SFO1      400.2324716 MHz
SI         32768
SF         400.2300198 MHz
WDM        no
SSB         0
LB          0.00 Hz
GB          0
PC          1.00
  
```

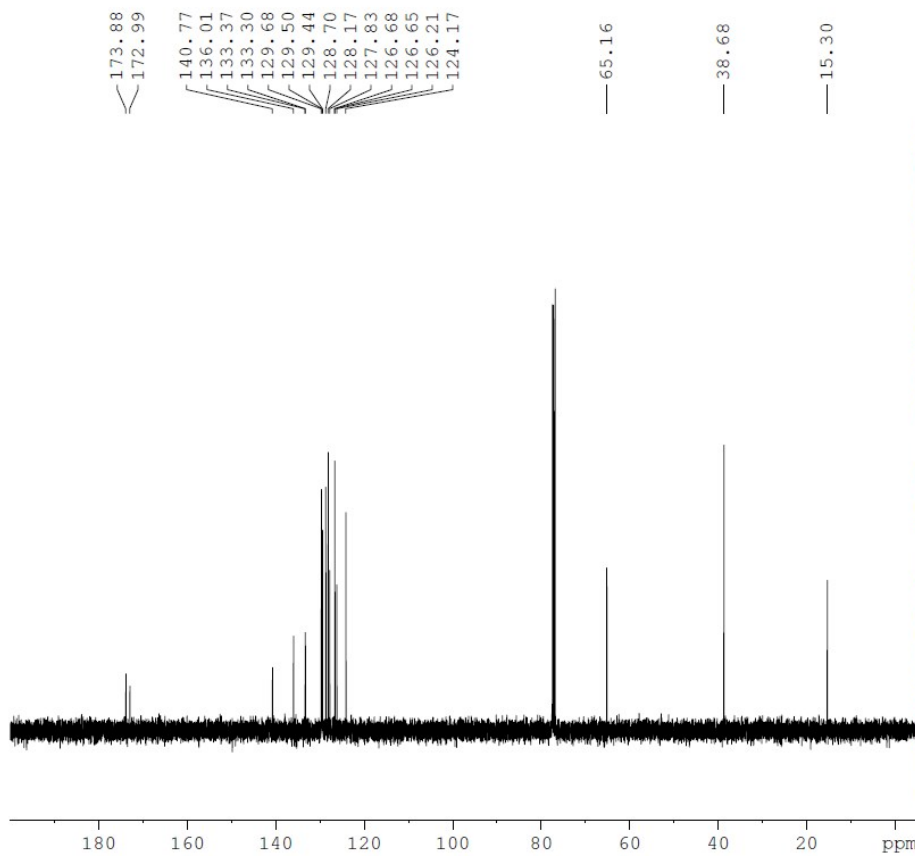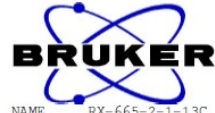

```

NAME      RX-665-2-1-13C
EXPNO     1
PROCNO    1
Date_     20191118
Time      11.54
INSTRUM   spect
PROBHD    5 mm FABBO BB-
PULPROG   zgpg30
TD         65536
SOLVENT   CDC13
NS         203
DS         4
SWH       25252.525 Hz
FIDRES    0.385323 Hz
AQ         1.2976629 sec
RG         22.6
DW         19.800 usec
DE         6.50 usec
TE         300.0 K
D1         2.00000000 sec
D11        0.03000000 sec
TD0        100
  
```

```

===== CHANNEL f1 =====
NUC1      13C
P1        10.00 usec
PL1        -2.00 dB
PL1W      59.71607590 W
SFO1      100.6499905 MHz
  
```

```

===== CHANNEL f2 =====
CPDPRG2   waltz16
NUC2      1H
PCPD2     80.00 usec
PL2        -4.00 dB
PL12       14.98 dB
PL13       13.89 dB
PL2W      23.09303856 W
PL12W     0.29206610 W
PL13W     0.37538856 W
SFO2      400.2316009 MHz
SI         32768
SF         100.6379037 MHz
WDM        no
SSB         0
LB          0.00 Hz
GB          0
PC          1.40
  
```

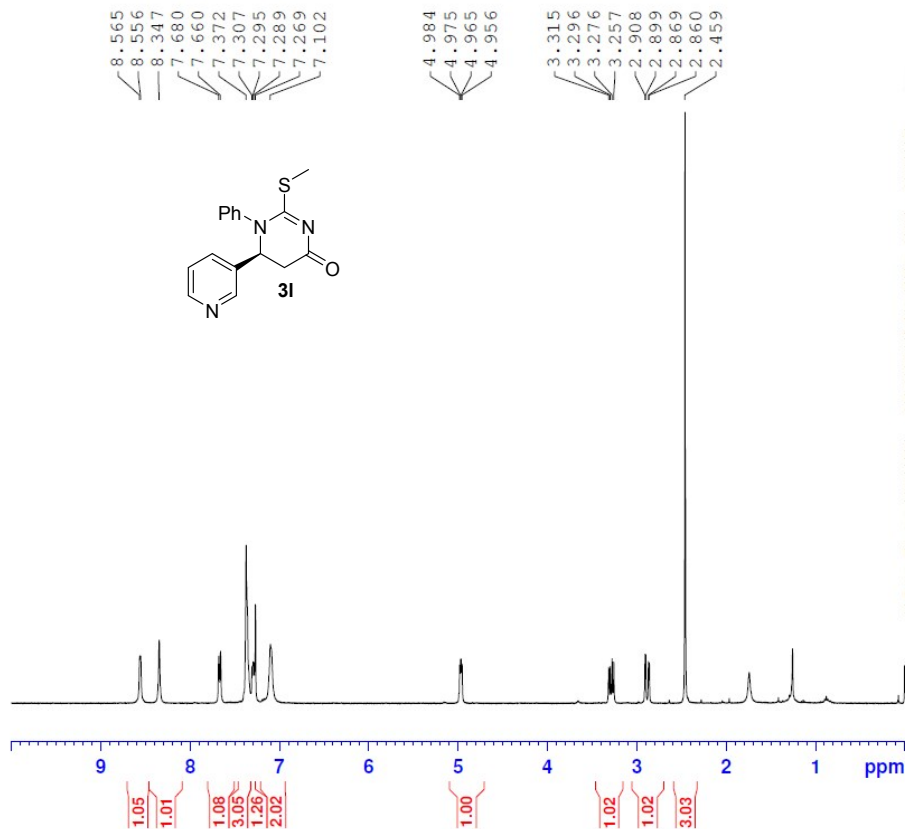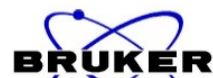

```

NAME      RX-680-9-1HNMR
EXPNO     1
PROCNO    1
Date_     20200114
Time      19.31
INSTRUM   spect
PROBHD    5 mm PABBO BB-
PULPROG   zg30
TD         65536
SOLVENT   CDC13
NS         8
DS         0
SWH        8223.685 Hz
FIDRES     0.125483 Hz
AQ         3.9846387 sec
RG         161
DW         60.800 usec
DE         6.50 usec
TE         299.4 K
D1         1.00000000 sec
TD0        1
  
```

```

===== CHANNEL f1 =====
NUC1       1H
P1         9.00 usec
PL1        -4.00 dB
PL1W       23.09303856 W
SFO1       400.2324716 MHz
SI         32768
SF         400.2300169 MHz
WDW        no
SSB        0
LB         0.00 Hz
GB         0
PC         1.00
  
```

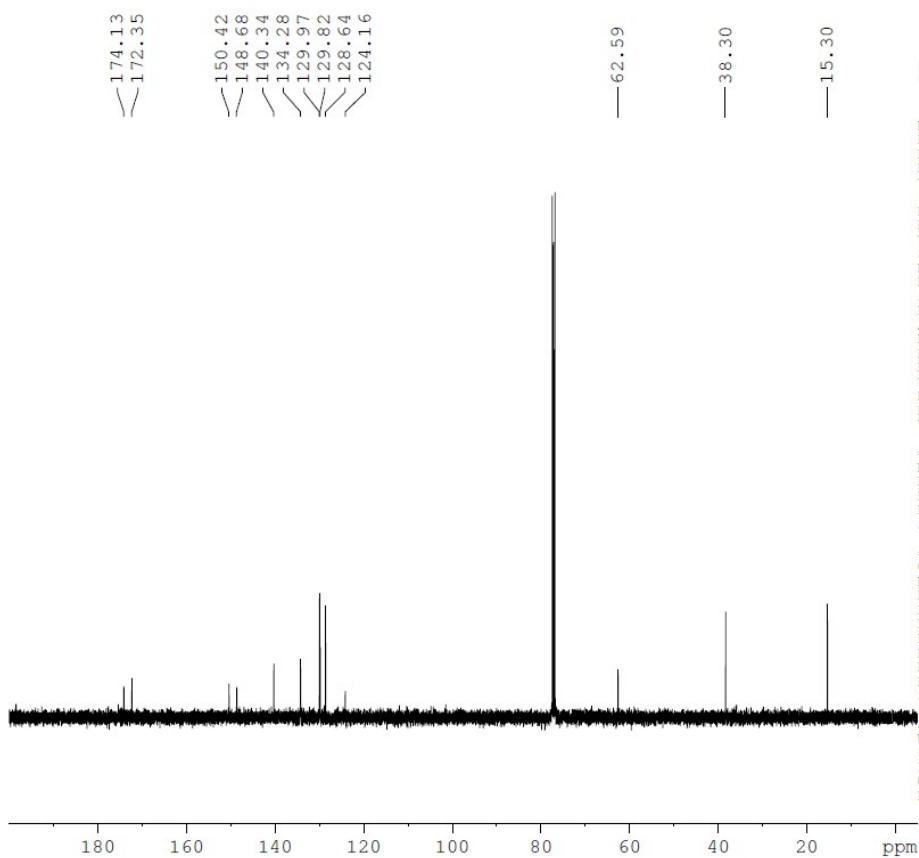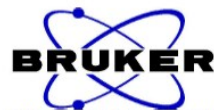

```

NAME      RX-680-9-13CNMR
EXPNO     1
PROCNO    1
Date_     20200114
Time      19.41
INSTRUM   spect
PROBHD    5 mm PABBO BB-
PULPROG   zgpg30
TD         65536
SOLVENT   CDC13
NS         528
DS         4
SWH        25252.525 Hz
FIDRES     0.385323 Hz
AQ         1.2976629 sec
RG         22.6
DW         19.800 usec
DE         6.50 usec
TE         300.3 K
D1         2.00000000 sec
D11        0.03000000 sec
TD0        100
  
```

```

===== CHANNEL f1 =====
NUC1       13C
P1         10.00 usec
PL1        -2.00 dB
PL1W       59.71607590 W
SFO1       100.6499905 MHz
  
```

```

===== CHANNEL f2 =====
CPDPRG2    waltz16
NUC2       1H
PCPD2      80.00 usec
PL2        -4.00 dB
PL12       14.98 dB
PL13       13.89 dB
PL2W       23.09303856 W
PL12W      0.29206610 W
PL13W      0.37538856 W
SFO2       400.2316009 MHz
SI         32768
SF         100.6379006 MHz
WDW        no
SSB        0
LB         0.00 Hz
GB         0
PC         1.40
  
```

7.428  
7.405  
7.401  
7.394  
7.377  
7.364  
7.354  
7.352  
7.350  
7.348  
7.268  
7.128  
6.266  
6.261  
6.257  
6.253  
6.188  
6.180  
4.960  
4.948  
4.942  
4.931  
3.173  
3.156  
3.134  
3.117  
3.068  
3.056  
3.029  
3.017  
2.412

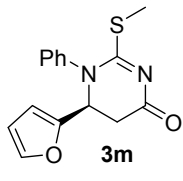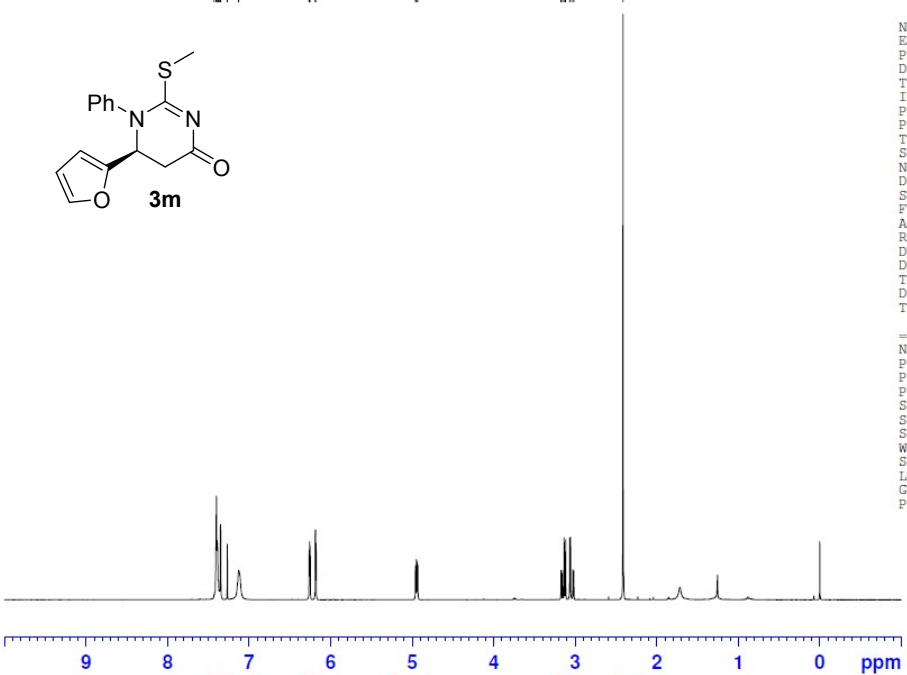

3.09  
1.02  
2.00  
1.01  
1.00  
1.11  
1.06  
1.05  
3.19

173.47  
173.08

150.40  
143.22  
140.43  
129.68  
129.66  
128.83

110.56  
109.32

58.02

35.90

15.23

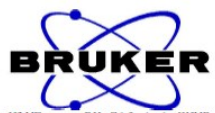

```

NAME      RX-719-1-1-HNMR
EXPNO     1
PROCNO    1
Date_     20200219
Time      22.36
INSTRUM   spect
PROBHD    5 mm PABBO BB-
PULPROG   zg30
TD         65536
SOLVENT   CDCl3
NS         8
DS         0
SWH        8223.685 Hz
FIDRES     0.125483 Hz
AQ         3.9846387 sec
RG         144
DW         60.800 usec
DE         6.50 usec
TE         298.7 K
D1         1.00000000 sec
D10       1
===== CHANNEL f1 =====
NUC1      1H
P1        9.00 usec
PL1       -4.00 dB
PL1W      23.09303856 W
SFO1      400.2324716 MHz
SI        32768
SF        400.2300174 MHz
WDW       EM
SSB       0
LB        0.30 Hz
GB        0
PC        1.00
  
```

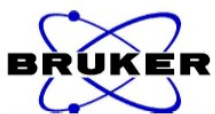

```

NAME      RX-719-1-1-CNMR
EXPNO     1
PROCNO    1
Date_     20200219
Time      22.46
INSTRUM   spect
PROBHD    5 mm PABBO BB-
PULPROG   zgpg30
TD         65536
SOLVENT   CDCl3
NS         480
DS         4
SWH        25252.525 Hz
FIDRES     0.385323 Hz
AQ         1.2976629 sec
RG         22.6
DW         19.800 usec
DE         6.50 usec
TE         300.0 K
D1         2.00000000 sec
D11        0.03000000 sec
D10       100
===== CHANNEL f1 =====
NUC1      13C
P1        10.00 usec
PL1       -2.00 dB
PL1W      59.71607590 W
SFO1      100.6499905 MHz
===== CHANNEL f2 =====
CPDPRG2   waltz16
NUC2      1H
PCPD2     80.00 usec
PL2       -4.00 dB
PL12      14.98 dB
PL13      13.89 dB
PL1W      23.09303856 W
PL12W     0.29206610 W
PL13W     0.37538856 W
SFO2      400.2316009 MHz
SI        32768
SF        100.6379014 MHz
WDW       no
SSB       0
LB        0.00 Hz
GB        0
PC        1.40
  
```

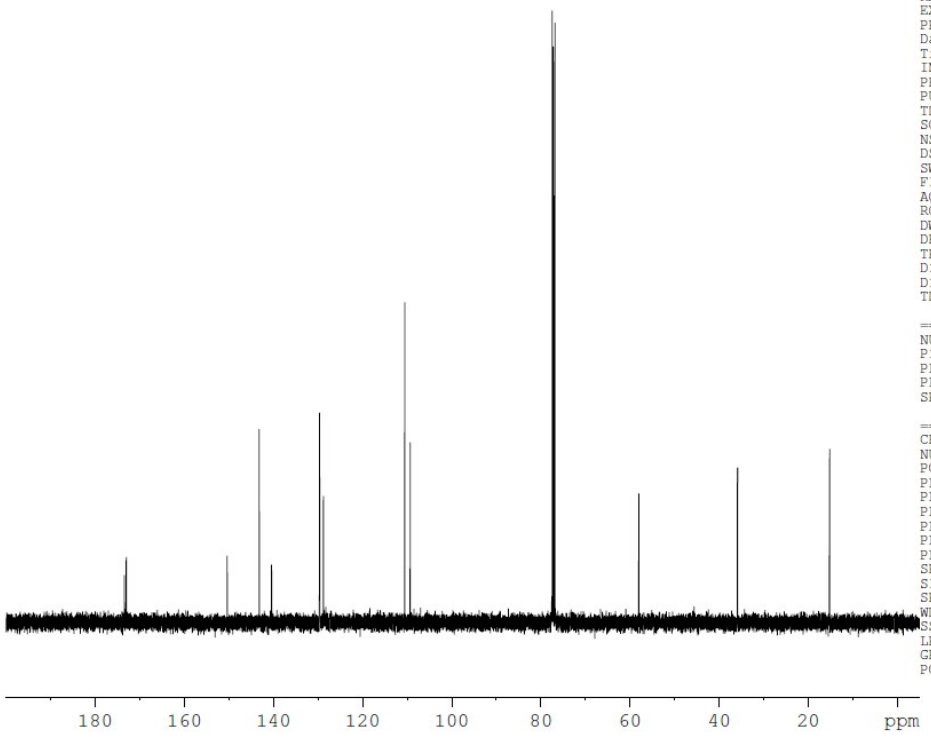

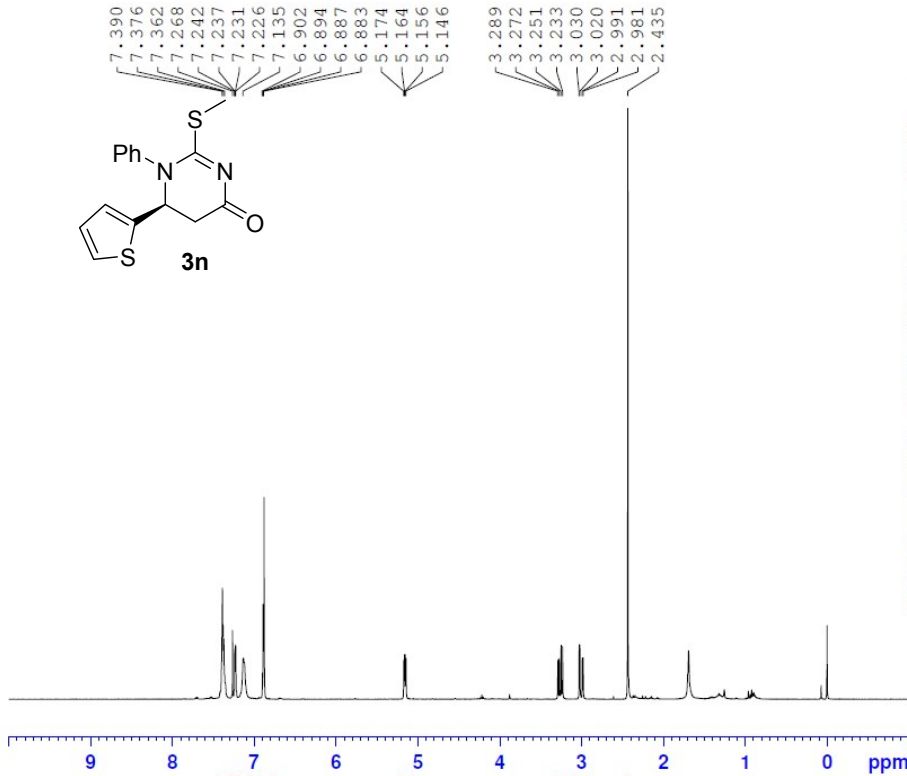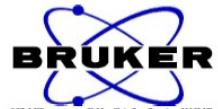

```

NAME      RX-719-2-1-HNMR
EXPNO     1
PROCNO    1
Date_     20200219
Time      10.08
INSTRUM   spect
PROBHD    5 mm PABBO BB-
PULPROG   zg30
TD         65536
SOLVENT   CDCl3
NS         8
DS         0
SWH        8223.685 Hz
FIDRES     0.125483 Hz
AQ         3.9846387 sec
RG         144
DW         60.800 usec
DE         6.50 usec
TE         298.4 K
D1         1.00000000 sec
TD0        1
  
```

```

===== CHANNEL f1 =====
NUC1      1H
P1         9.00 usec
PL1        -4.00 dB
PL1W      23.09303856 W
SFO1      400.2324716 MHz
SI         32768
SF         400.2300176 MHz
WDW        EM
SSB        0
LB         0.30 Hz
GB         0
PC         1.00
  
```

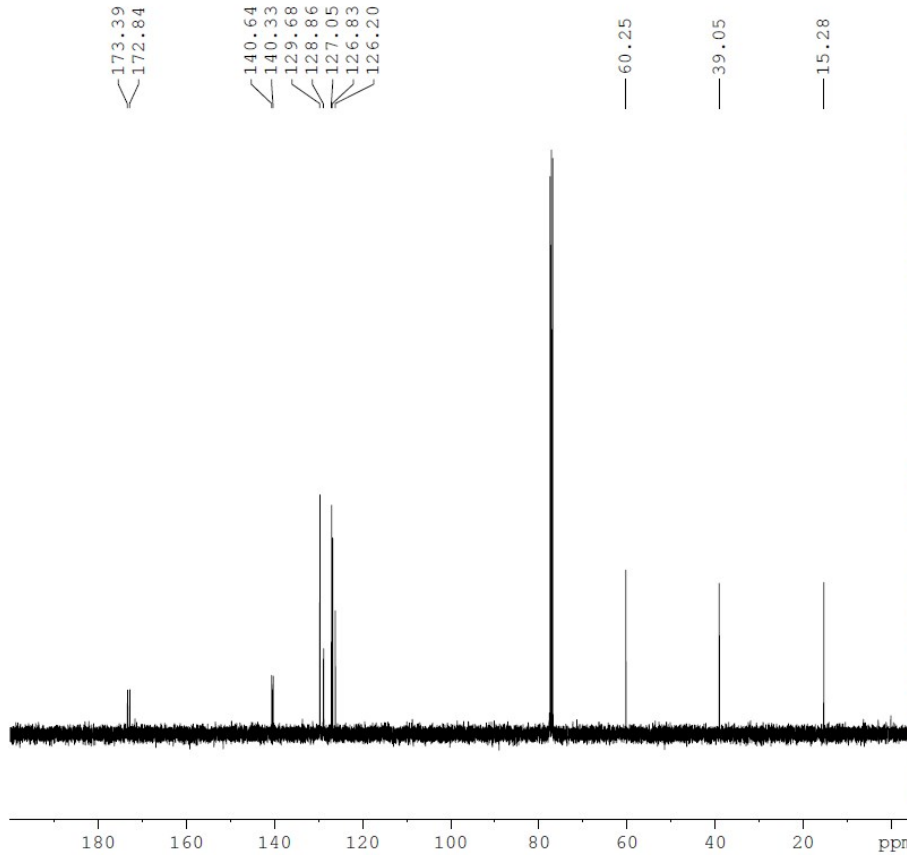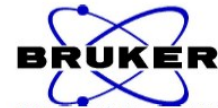

```

NAME      RX-719-2-1-CNMR
EXPNO     1
PROCNO    1
Date_     20200219
Time      10.34
INSTRUM   spect
PROBHD    5 mm PABBO BB-
PULPROG   zgpg30
TD         65536
SOLVENT   CDCl3
NS         4
DS         4
SWH        25252.525 Hz
FIDRES     0.385323 Hz
AQ         1.2976629 sec
RG         25.4
DW         19.800 usec
DE         6.50 usec
TE         298.9 K
D1         2.00000000 sec
D11        0.03000000 sec
TD0        100
  
```

```

===== CHANNEL f1 =====
NUC1      13C
P1         10.00 usec
PL1        -2.00 dB
PL1W      59.71607590 W
SFO1      100.6499905 MHz
  
```

```

===== CHANNEL f2 =====
CPDPRG2   waltz16
NUC2      1H
PCPD2     80.00 usec
PL2        -4.00 dB
PL12      14.98 dB
PL13      13.89 dB
PL2W      23.09303856 W
PL12W     0.29206610 W
PL13W     0.37538856 W
SFO2      400.2316009 MHz
SI         32768
SF         100.6379010 MHz
WDW        no
SSB        0
LB         0.00 Hz
GB         0
PC         1.40
  
```

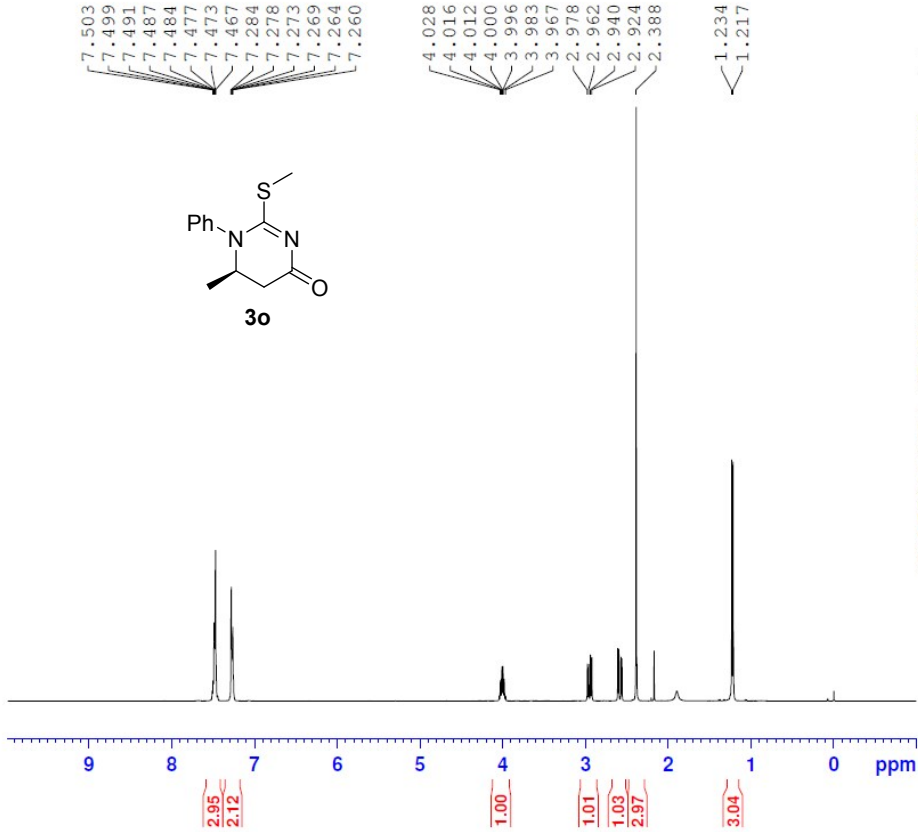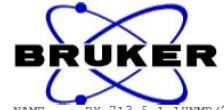

```

NAME      RX-713-5-1-1HNMR (2nd)
EXPNO    1
PROCNO   1
Date_    20200117
Time     23.50
INSTRUM  spect
PROBHD   5 mm PABBO BB-
PULPROG  zg30
TD       65536
SOLVENT  CDCl3
NS       8
DS       0
SWH      8223.685 Hz
FIDRES   0.125483 Hz
AQ       3.9846387 sec
RG       114
DW       60.800 usec
DE       6.50 usec
TE       298.3 K
D1       1.00000000 sec
TD0      1
  
```

```

===== CHANNEL f1 =====
NUC1     1H
P1       9.00 usec
PL1      -4.00 dB
PL1W     23.09303856 W
SFO1     400.2324716 MHz
SI       32768
SF       400.2300111 MHz
WDW      EM
SSB      0
LB       0.30 Hz
GB       0
PC       1.00
  
```

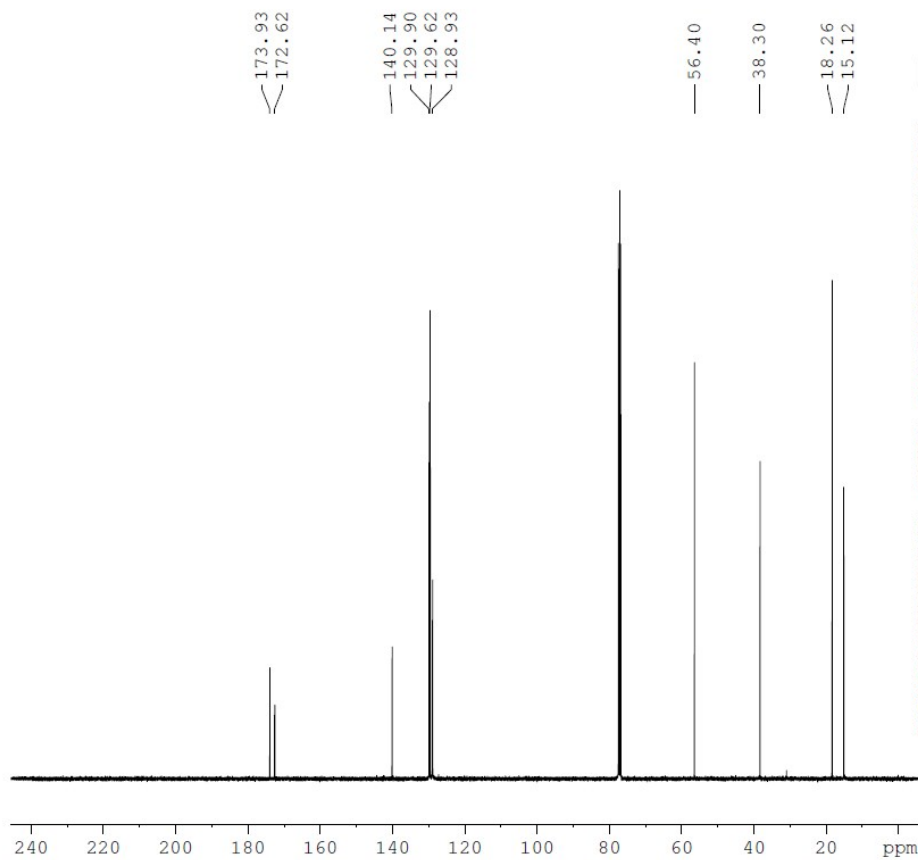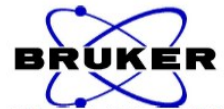

```

NAME      RX-713-5-1-13CNMR (2nd)
EXPNO    1
PROCNO   1
Date_    20200118
Time     0.02
INSTRUM  spect
PROBHD   5 mm PABBO BB-
PULPROG  zgpg30
TD       65536
SOLVENT  CDCl3
NS       10000
DS       4
SWH      25252.525 Hz
FIDRES   0.385323 Hz
AQ       1.2976629 sec
RG       25.4
DW       19.800 usec
DE       6.50 usec
TE       299.6 K
D1       2.00000000 sec
D11      0.03000000 sec
TD0      100
  
```

```

===== CHANNEL f1 =====
NUC1     13C
P1       10.00 usec
PL1      -2.00 dB
PL1W     59.71607590 W
SFO1     100.6499905 MHz
  
```

```

===== CHANNEL f2 =====
CPDPRG2  waltz16
NUC2     1H
PCPD2    80.00 usec
PL2      -4.00 dB
PL12     14.98 dB
PL13     13.89 dB
PL2W     23.09303856 W
PL12W    0.29206610 W
PL13W    0.37538856 W
SFO2     400.2316009 MHz
SI       32768
SF       100.6379040 MHz
WDW      no
SSB      0
LB       0.00 Hz
GB       0
PC       1.40
  
```

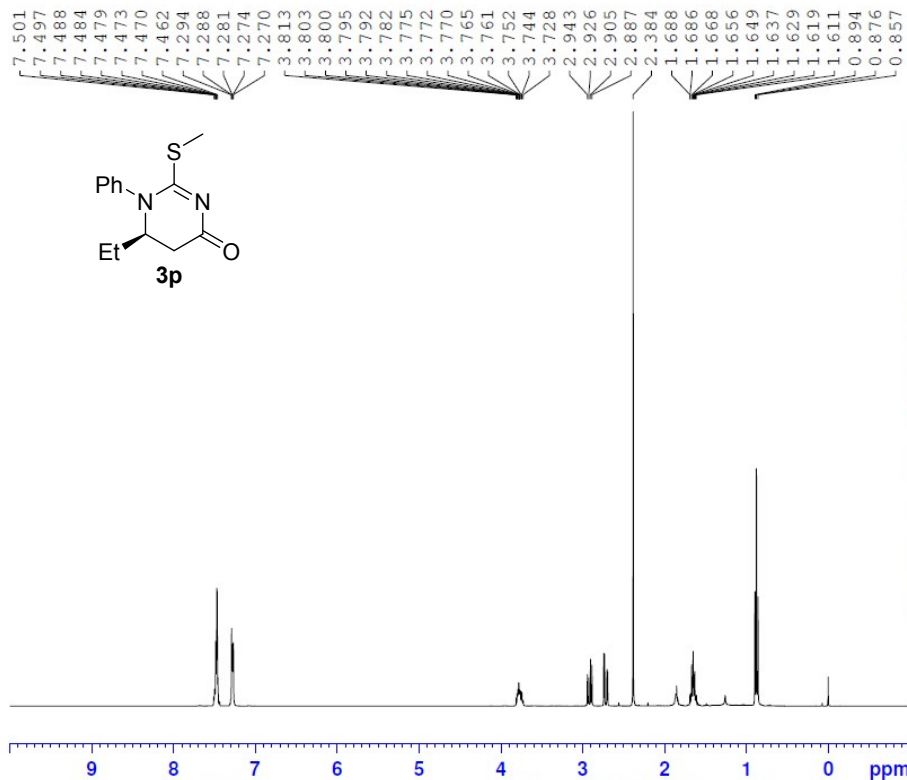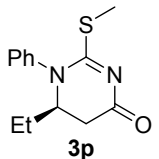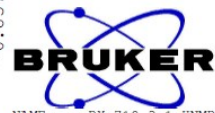

```

NAME      RX-719-3-1-HNMR
EXPNO     1
PROCNO    1
Date_     20200224
Time      20.12
INSTRUM   spect
PROBHD    5 mm PABBO BB-
PULPROG   zg30
TD         65536
SOLVENT   CDC13
NS         8
DS         0
SWH        8223.685 Hz
FIDRES     0.125483 Hz
AQ         3.9846387 sec
RG         101
DW         60.800 usec
DE         6.50 usec
TE         299.3 K
D1         1.00000000 sec
TD0        1

===== CHANNEL f1 =====
NUC1      1H
P1         9.00 usec
PL1        -4.00 dB
PL1W      23.09303856 W
SFO1      400.2324716 MHz
SI         32768
SF         400.2300123 MHz
WDW        EM
SSB        0
LB         0.30 Hz
GB         0
PC         1.00
  
```

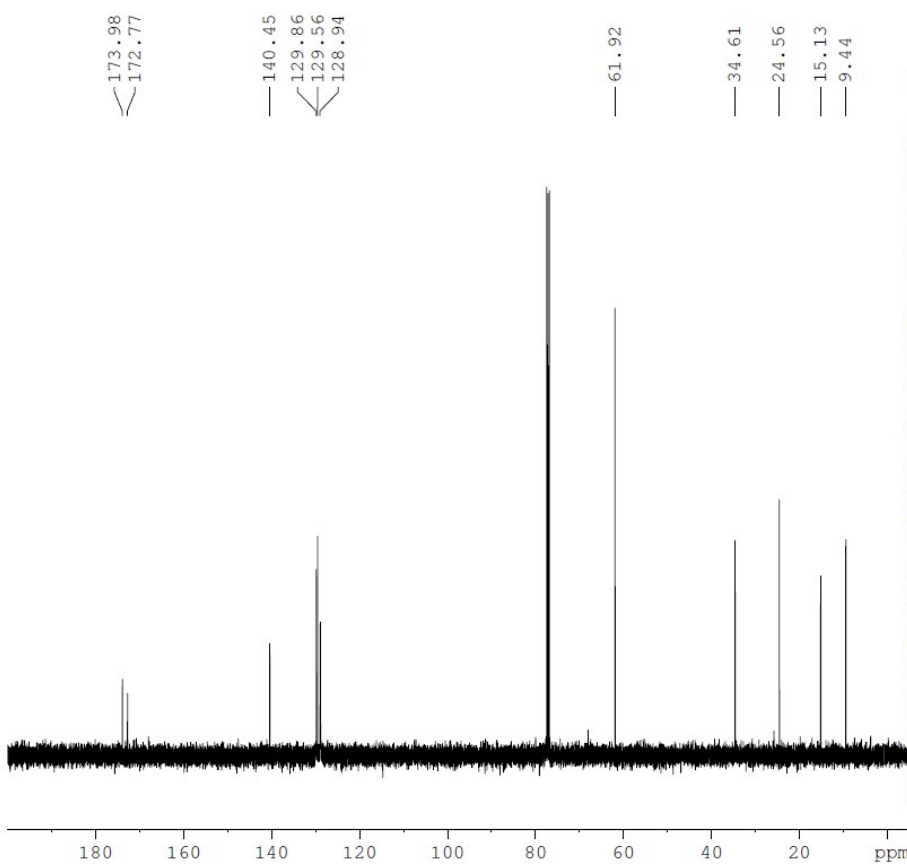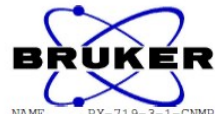

```

NAME      RX-719-3-1-CNMR
EXPNO     1
PROCNO    1
Date_     20200224
Time      20.24
INSTRUM   spect
PROBHD    5 mm PABBO BB-
PULPROG   zgpg30
TD         65536
SOLVENT   CDC13
NS         261
DS         4
SWH        25252.525 Hz
FIDRES     0.385323 Hz
AQ         1.2976629 sec
RG         25.4
DW         19.800 usec
DE         6.50 usec
TE         300.3 K
D1         2.00000000 sec
D11        0.03000000 sec
TD0        100

===== CHANNEL f1 =====
NUC1      13C
P1        10.00 usec
PL1        -2.00 dB
PL1W      59.71607590 W
SFO1      100.6499905 MHz

===== CHANNEL f2 =====
CPDPRG2   waltz16
NUC2      1H
PCPD2     80.00 usec
PL2        -4.00 dB
PL12      14.98 dB
PL13      13.89 dB
PL2W      23.09303856 W
PL12W     0.29206610 W
PL13W     0.37538856 W
SFO2      400.2316009 MHz
SI         32768
SF         100.6379041 MHz
WDW        no
SSB        0
LB         0.00 Hz
GB         0
PC         1.40
  
```

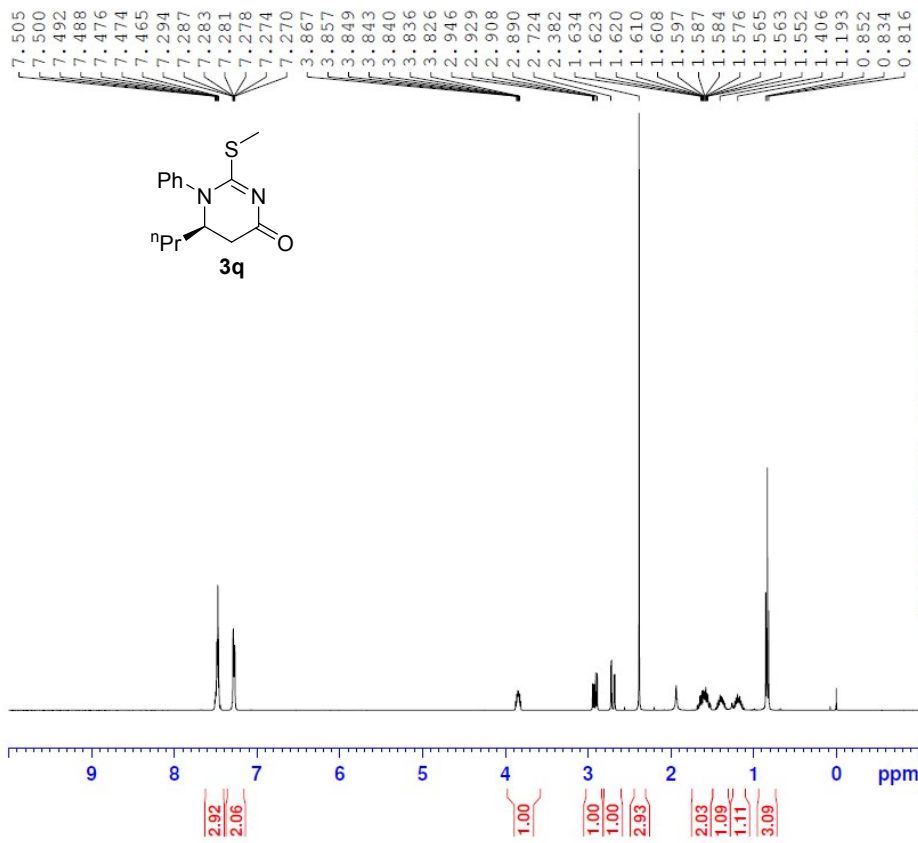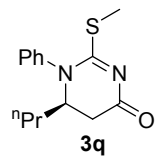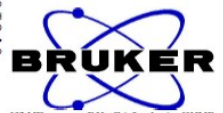

```

NAME      RX-719-4-1-HNMR
EXPNO    1
PROCNO   1
Date_    20200224
Time     20.38
INSTRUM  5 mm PABBO BB-
PROBHD   zg30
PULPROG  65536
TD       CDC13
SOLVENT  8
NS       0
DS       0
SWH      8223.685 Hz
FIDRES   0.125483 Hz
AQ       3.9846387 sec
RG       80.6
DW       60.800 usec
DE       6.50 usec
TE       299.6 K
D1       1.00000000 sec
TDO     1
===== CHANNEL f1 =====
NUC1     1H
P1       9.00 usec
PL1     -4.00 dB
PL1W    23.09303856 W
SFO1    400.2324716 MHz
SI      32768
SF      400.2300096 MHz
WDW     EM
SSB     0
LB      0.30 Hz
GB      0
PC      1.00
  
```

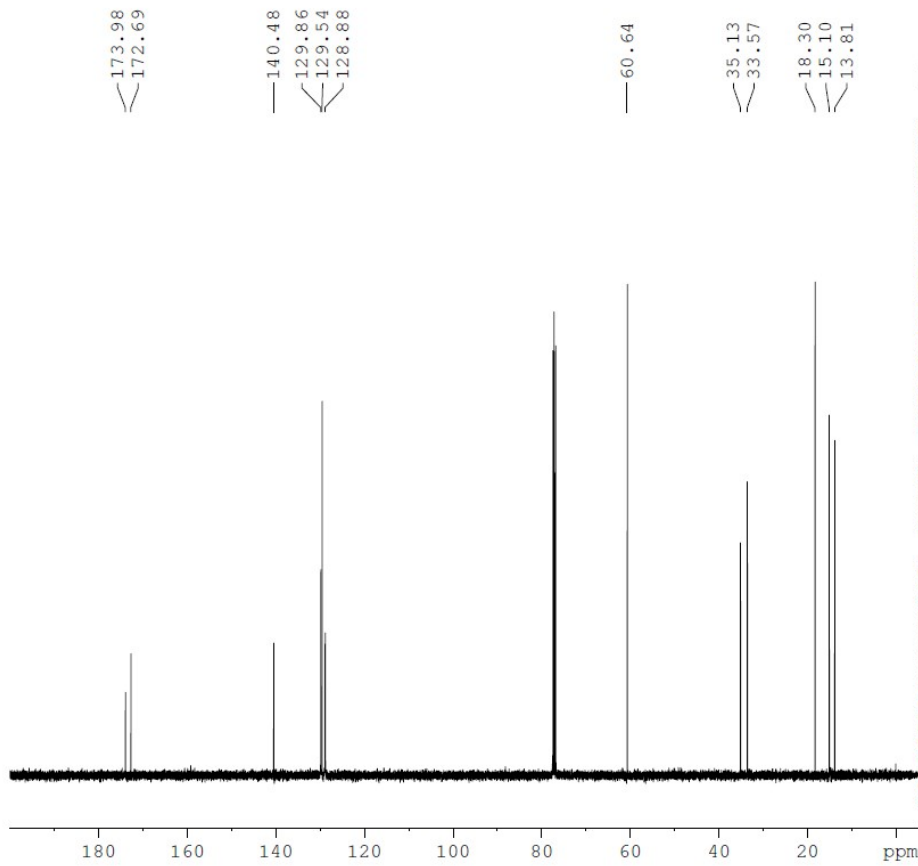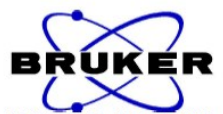

```

NAME      RX-719-4-1-CNMR
EXPNO    1
PROCNO   1
Date_    20200224
Time     20.48
INSTRUM  5 mm PABBO BB-
PROBHD   zgpg30
PULPROG  65536
TD       CDC13
SOLVENT  758
NS       4
DS       0
SWH      25252.525 Hz
FIDRES   0.385323 Hz
AQ       1.2976629 sec
RG       25.4
DW       19.800 usec
DE       6.50 usec
TE       300.5 K
D1       2.00000000 sec
D11     0.03000000 sec
TDO     100
===== CHANNEL f1 =====
NUC1     13C
P1       9.50 usec
PL1     -2.00 dB
PL1W    59.71607590 W
SFO1    100.6499905 MHz
===== CHANNEL f2 =====
CPDPRG2  waltz16
NUC2     1H
PCPD2   80.00 usec
PL2     -4.00 dB
PL12    13.89 dB
PL13    13.89 dB
PL2W    23.09303856 W
PL12W   0.37538856 W
PL13W   0.37538856 W
SFO2    400.2316009 MHz
SI      32768
SF      100.6379045 MHz
WDW     no
SSB     0
LB      0.00 Hz
GB      0
PC      1.40
  
```



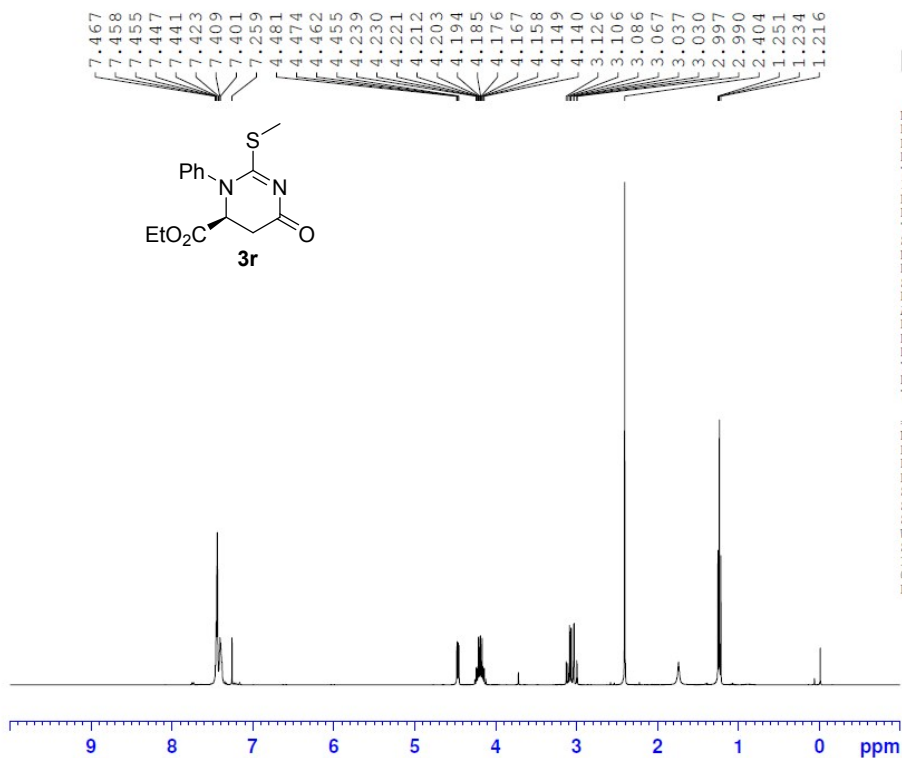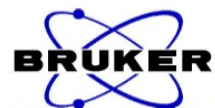

```

NAME      RX-713-4-1-HNMR
EXPNO     1
PROCNO    1
Date_     20200224
Time      19.32
INSTRUM   spect
PROBHD    5 mm PABBO BB-
PULPROG   zg30
TD         65536
SOLVENT   CDCl3
NS         8
DS         0
SWH        8223.685 Hz
FIDRES     0.125483 Hz
AQ         3.9846387 sec
RG         114
DW         60.800 usec
DE         6.50 usec
TE         299.2 K
D1         1.00000000 sec
D11        1
TDO        1
===== CHANNEL f1 =====
NUC1       1H
P1         9.00 usec
PL1        -4.00 dB
PL1W       23.09303856 W
SFO1       400.2324716 MHz
SI         32768
SF         400.2300208 MHz
WDW        EM
SSB        0
LB         0.30 Hz
GB         0
PC         1.00

```

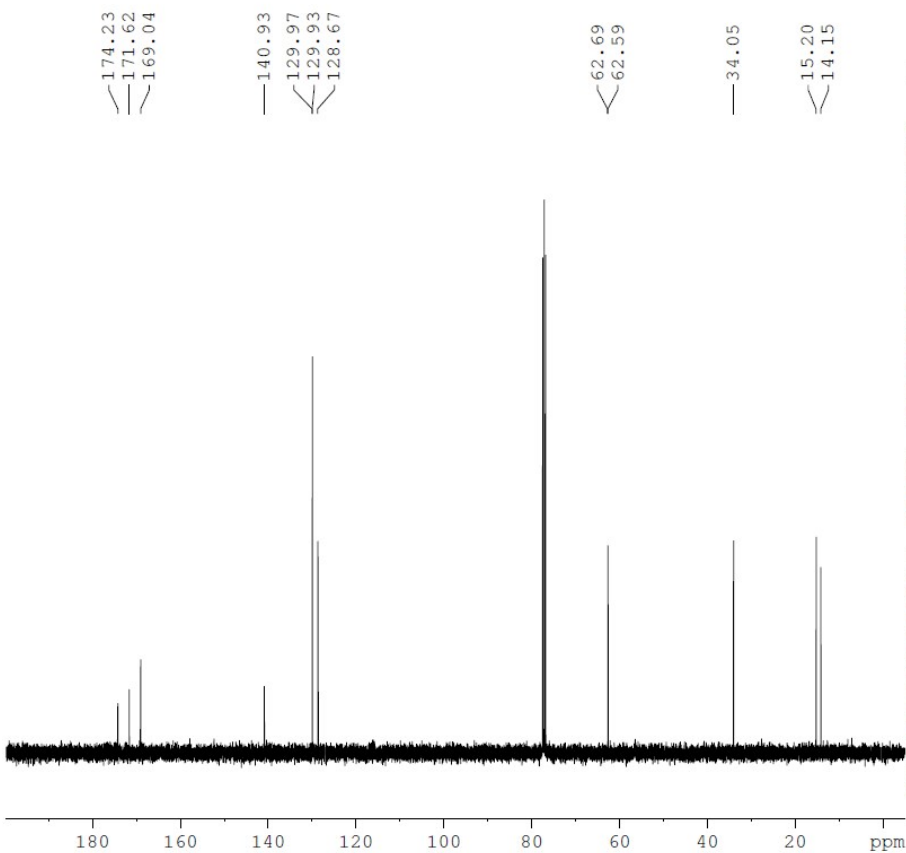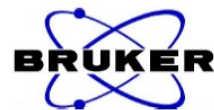

```

NAME      RX-713-4-1-CNMR
EXPNO     1
PROCNO    1
Date_     20200224
Time      19.44
INSTRUM   spect
PROBHD    5 mm PABBO BB-
PULPROG   zgpg30
TD         65536
SOLVENT   CDCl3
NS         389
DS         4
SWH        25252.525 Hz
FIDRES     0.385323 Hz
AQ         1.2976629 sec
RG         25.4
DW         19.800 usec
DE         6.50 usec
TE         300.3 K
D1         2.00000000 sec
D11        0.03000000 sec
TDO        100
===== CHANNEL f1 =====
NUC1       13C
P1         10.00 usec
PL1        -2.00 dB
PL1W       59.71607590 W
SFO1       100.6499905 MHz
===== CHANNEL f2 =====
CPDPRG2   waltz16
NUC2       1H
PCPD2     80.00 usec
PL2        -4.00 dB
PL12      14.98 dB
PL13      13.89 dB
PL2W      23.09303856 W
PL12W     0.29206610 W
PL13W     0.37538856 W
SFO2       400.2316009 MHz
SI         32768
SF         100.6379015 MHz
WDW        no
SSB        0
LB         0.00 Hz
GB         0
PC         1.40

```

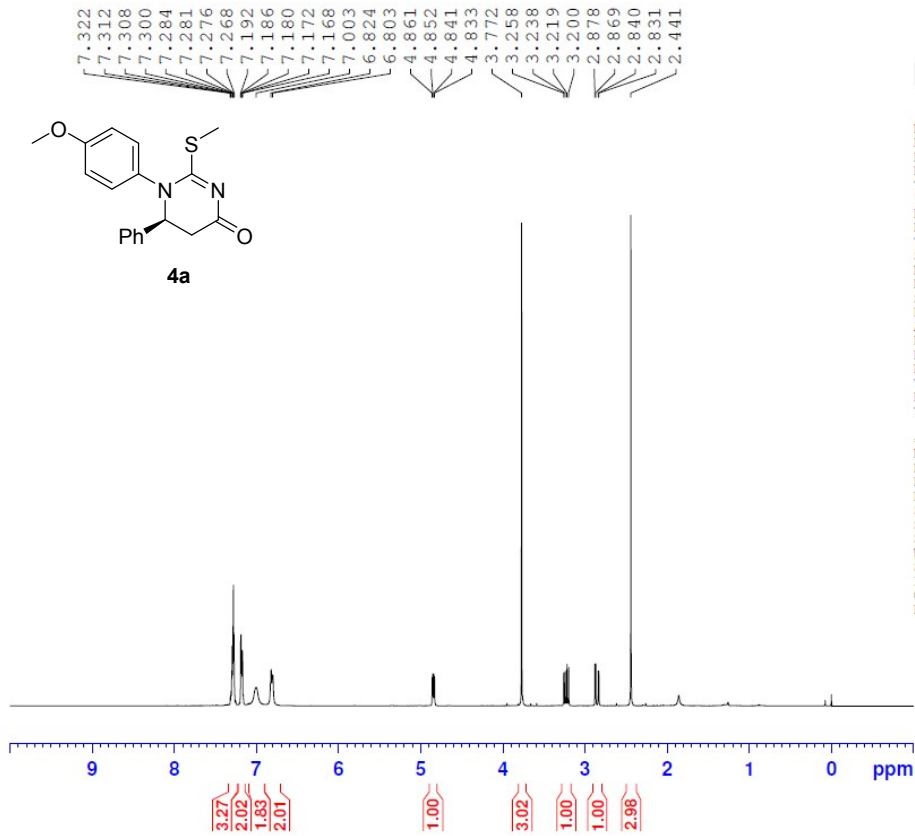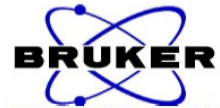

```

NAME      RX-703-4-1-1HNMR
EXPNO    1
PROCNO   1
Date_    20191231
Time     17.48
INSTRUM  spect
PROBHD   5 mm PABBO BB-
PULPROG  zg30
TD       65536
SOLVENT  CDCl3
NS       8
DS       0
SWH      8223.685 Hz
FIDRES   0.125483 Hz
AQ       3.9846387 sec
RG       90.5
DW       60.800 usec
DE       6.50 usec
TE       300.2 K
D1       1.00000000 sec
TD0      1
  
```

```

===== CHANNEL f1 =====
NUC1     1H
P1       9.00 usec
PL1      -4.00 dB
PL1W     23.09303856 W
SFO1     400.2324716 MHz
SI       32768
SF       400.2300142 MHz
WDW      EM
SSB      0
LB       0.30 Hz
GB       0
PC       1.00
  
```

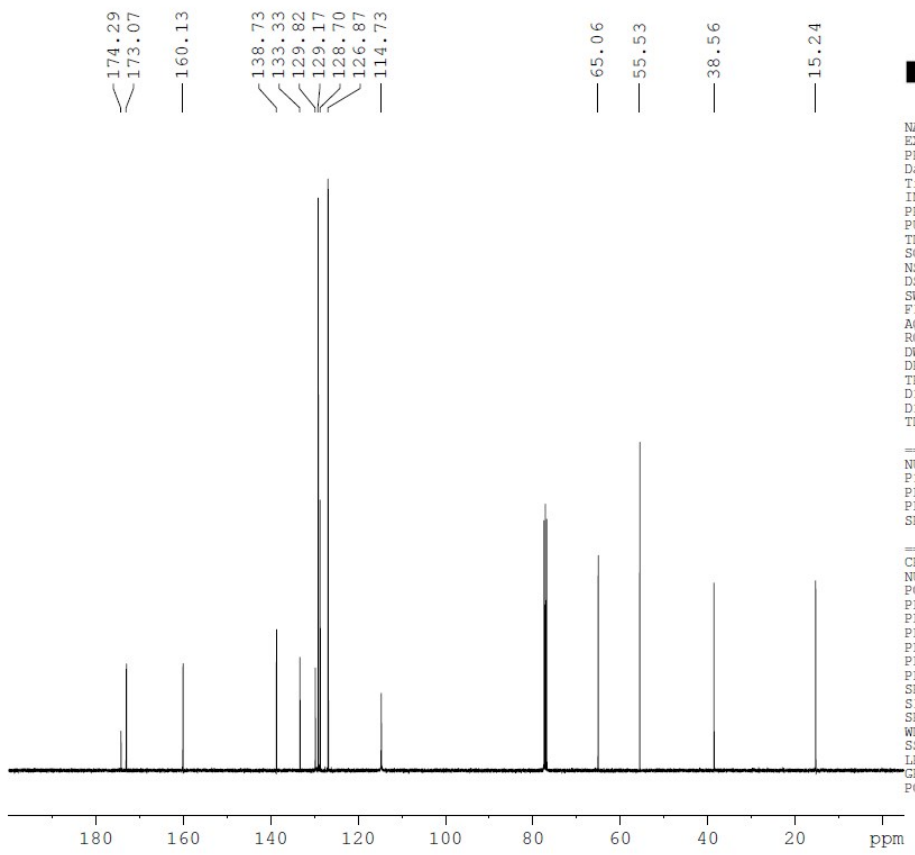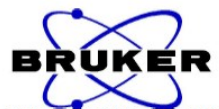

```

NAME      RX-703-4-1-13CNMR
EXPNO    1
PROCNO   1
Date_    20191231
Time     17.57
INSTRUM  spect
PROBHD   5 mm PABBO BB-
PULPROG  zgpg30
TD       65536
SOLVENT  CDCl3
NS       2127
DS       4
SWH      25252.525 Hz
FIDRES   0.385323 Hz
AQ       1.2976629 sec
RG       32
DW       19.800 usec
DE       6.50 usec
TE       301.0 K
D1       2.00000000 sec
D11      0.03000000 sec
TD0      100
  
```

```

===== CHANNEL f1 =====
NUC1     13C
P1       10.00 usec
PL1      -2.00 dB
PL1W     59.71607590 W
SFO1     100.6499905 MHz

===== CHANNEL f2 =====
CPDPRG2  waltz16
NUC2     1H
PCPD2   80.00 usec
PL2     -4.00 dB
PL12    14.98 dB
PL13    13.89 dB
PL2W    23.09303856 W
PL12W   0.29206610 W
PL13W   0.37538856 W
SFO2    400.2316009 MHz
SI      32768
SF      100.6379054 MHz
WDW     no
SSB     0
LB      0.00 Hz
GB      0
PC      1.40
  
```

7.320  
7.311  
7.306  
7.298  
7.283  
7.280  
7.272  
7.193  
7.187  
7.181  
7.173  
7.169  
7.135  
7.115  
6.995  
6.977  
4.883  
4.875  
4.864  
4.855  
3.264  
3.244  
3.225  
3.206  
2.880  
2.872  
2.842  
2.833  
2.446  
2.329

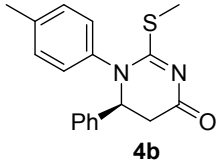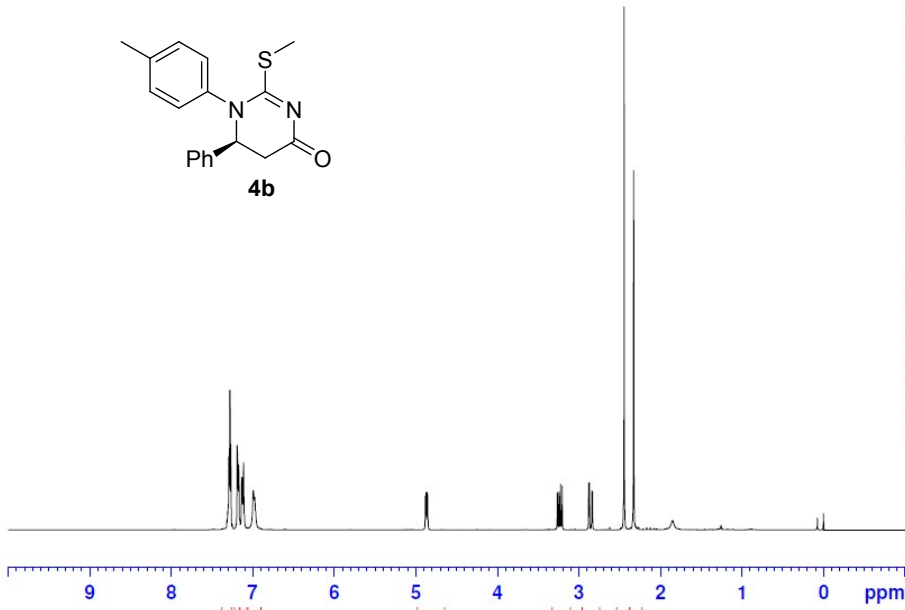

3.12  
1.96  
1.90  
1.88  
1.00  
1.01  
0.99  
2.96  
2.99

173.91  
173.05  
139.68  
138.70  
138.17  
130.26  
129.17  
128.69  
128.34  
126.83  
64.97  
38.62  
21.27  
15.20

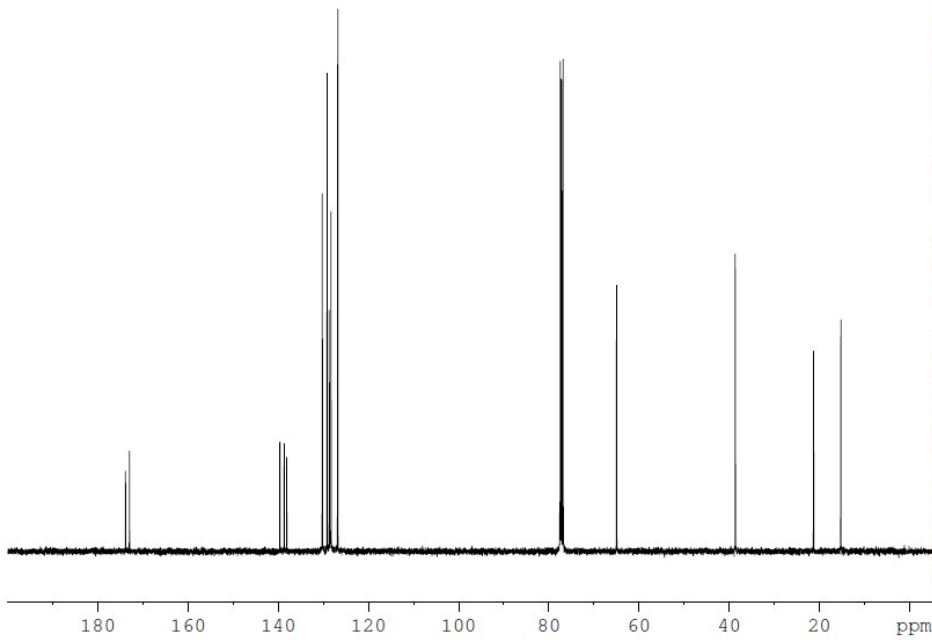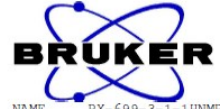

```

NAME      RX-699-3-1-1HNMR
EXPNO     1
PROCNO    1
Date_     20191220
Time      15.32
INSTRUM   spect
PROBHD    5 mm PABBO BB-
PULPROG   zg30
TD         65536
SOLVENT   CDC13
NS         8
DS         0
SWH       8223.685 Hz
FIDRES    0.125483 Hz
AQ         3.9846387 sec
RG         101
DW         60.800 usec
DE         6.50 usec
TE         299.4 K
D1         1.00000000 sec
D11        1
D10        1
  
```

```

===== CHANNEL f1 =====
NUC1      1H
P1         9.00 usec
PL1       -4.00 dB
PL1W      23.09303856 W
SFO1      400.2324716 MHz
SI         32768
SF         400.2300159 MHz
WDW        EM
SSB        0
LB         0.30 Hz
GB         0
PC         1.00
  
```

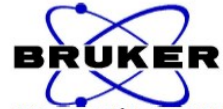

```

NAME      RX-699-3-1-13CNMR
EXPNO     1
PROCNO    1
Date_     20191220
Time      15.42
INSTRUM   spect
PROBHD    5 mm PABBO BB-
PULPROG   zgpg30
TD         65536
SOLVENT   CDC13
NS         818
DS         4
SWH       25252.525 Hz
FIDRES    0.385323 Hz
AQ         1.2976629 sec
RG         32
DW         19.800 usec
DE         6.50 usec
TE         300.5 K
D1         2.00000000 sec
D11        0.03000000 sec
D10        100
  
```

```

===== CHANNEL f1 =====
NUC1      13C
P1         10.00 usec
PL1       -2.00 dB
PL1W      59.71607590 W
SFO1      100.6499905 MHz

===== CHANNEL f2 =====
CPDPRG2   waltz16
NUC2      1H
PCPD2     80.00 usec
PL2       -4.00 dB
PL12      14.98 dB
PL13      13.89 dB
PL2W      23.09303856 W
PL12W     0.29206610 W
PL13W     0.37538956 W
SFO2      400.2316009 MHz
SI         32768
SF         100.6379046 MHz
WDW        EM
SSB        0
LB         1.00 Hz
GB         0
PC         1.40
  
```

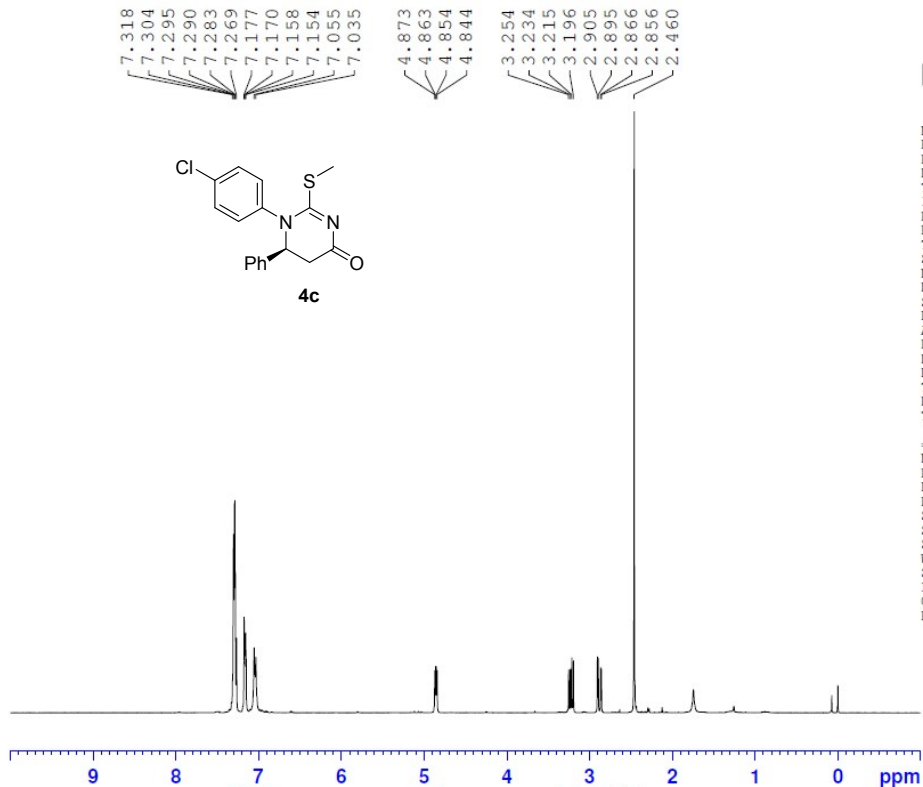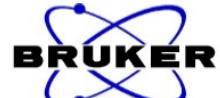

```

NAME RX-682-4-1-1HNMR
EXPNO 1
PROCNO 1
Date_ 20191220
Time 14.31
INSTRUM spect
PROBHD 5 mm PABBO BB-
PULPROG zg30
TD 65536
SOLVENT CDCl3
NS 8
DS 0
SWH 8223.685 Hz
FIDRES 0.125483 Hz
AQ 3.9846387 sec
RG 144
DW 60.800 usec
DE 6.50 usec
TE 299.6 K
D1 1.00000000 sec
TD0 1

```

```

===== CHANNEL f1 =====
NUC1 1H
P1 9.00 usec
PL1 -4.00 dB
PL1W 23.09303856 W
SFO1 400.2324716 MHz
SI 32768
SF 400.2300169 MHz
WDW EM
SSB 0
LB 0.30 Hz
GB 0
PC 1.00

```

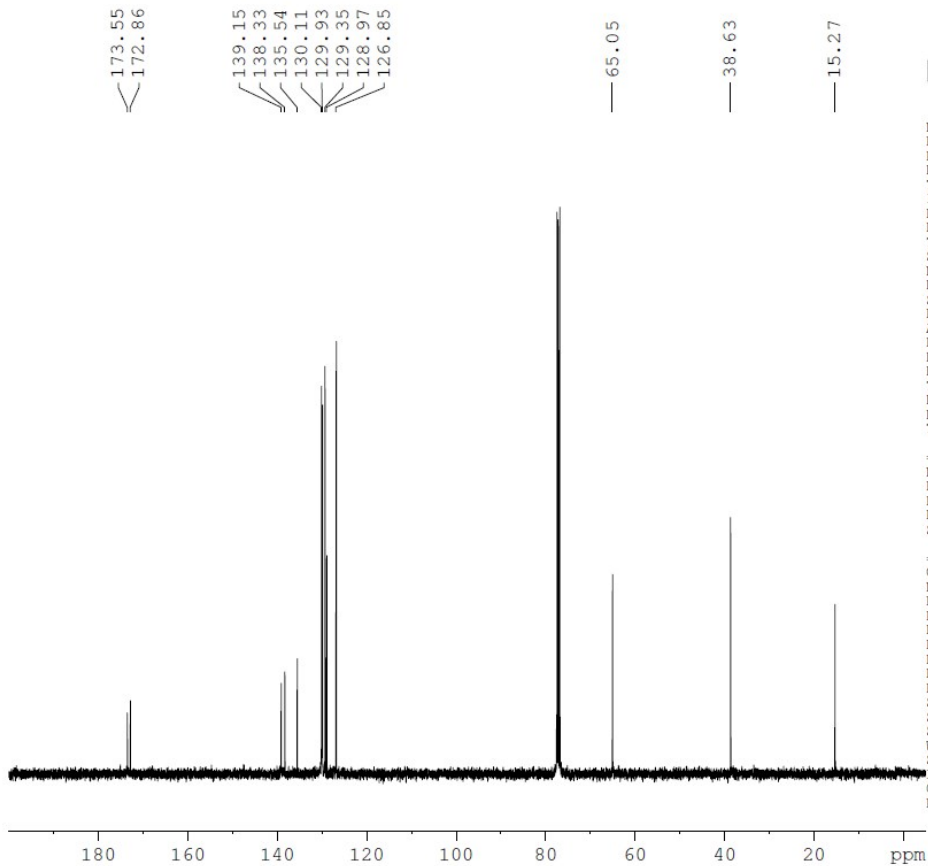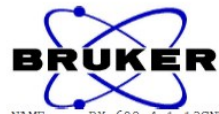

```

NAME RX-682-4-1-13CNMR
EXPNO 1
PROCNO 1
Date_ 20191220
Time 14.41
INSTRUM spect
PROBHD 5 mm PABBO BB-
PULPROG zgpg30
TD 65536
SOLVENT CDCl3
NS 379
DS 4
SWH 25252.525 Hz
FIDRES 0.385323 Hz
AQ 1.2976629 sec
RG 32
DW 19.800 usec
DE 6.50 usec
TE 300.4 K
D1 2.00000000 sec
D11 0.03000000 sec
TD0 100

```

```

===== CHANNEL f1 =====
NUC1 13C
P1 10.00 usec
PL1 -2.00 dB
PL1W 59.71607590 W
SFO1 100.6499905 MHz

===== CHANNEL f2 =====
CPDPRG2 waltz16
NUC2 1H
PCPD2 80.00 usec
PL2 -4.00 dB
PL12 14.98 dB
PL13 13.89 dB
PL2W 23.09303856 W
PL12W 0.29206610 W
PL13W 0.37538856 W
SFO2 400.2316009 MHz
SI 32768
SF 100.6379031 MHz
WDW EM
SSB 0
LB 1.00 Hz
GB 0
PC 1.40

```

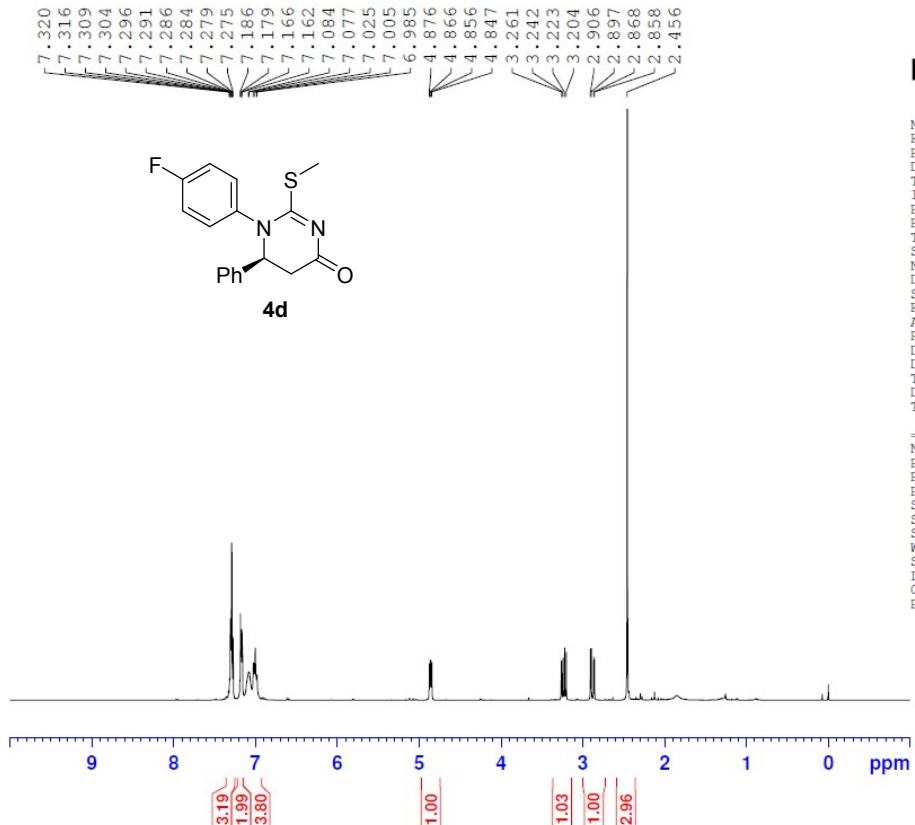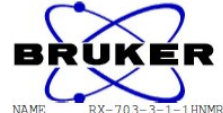

```

NAME      RX-703-3-1-1HNMR
EXPNO    1
PROCNO   1
Date_    20191231
Time     17.09
INSTRUM  spect
PROBHD   5 mm PABBO BB-
PULPROG  zg30
TD        65536
SOLVENT  CDCl3
NS        8
DS        0
SWH      8223.685 Hz
FIDRES   0.125483 Hz
AQ        3.9846387 sec
RG        101
DW        60.800 usec
DE        6.50 usec
TE        299.4 K
D1        1.00000000 sec
TD0       1
  
```

```

===== CHANNEL f1 =====
NUC1     1H
P1       9.00 usec
PL1     -4.00 dB
PL1W    23.09303856 W
SFO1    400.2324716 MHz
SI       32768
SF      400.2300144 MHz
WDW      EM
SSB      0
LB       0.30 Hz
GB       0
PC       1.00
  
```

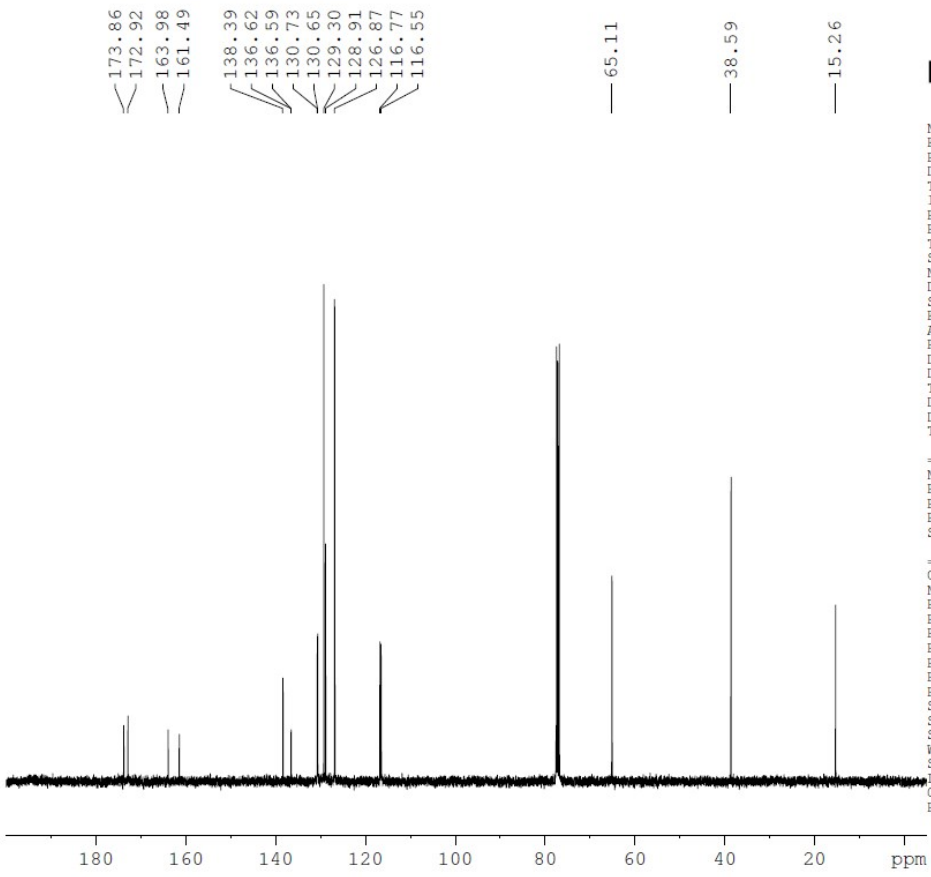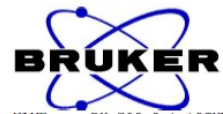

```

NAME      RX-703-3-1-13CNMR
EXPNO    1
PROCNO   1
Date_    20191231
Time     17.27
INSTRUM  spect
PROBHD   5 mm PABBO BB-
PULPROG  zgpg30
TD        65536
SOLVENT  CDCl3
NS        300
DS        4
SWH      25252.525 Hz
FIDRES   0.385323 Hz
AQ        1.2976629 sec
RG        22.6
DW        19.800 usec
DE        6.50 usec
TE        299.8 K
D1        2.00000000 sec
D11      0.03000000 sec
TD0       100
  
```

```

===== CHANNEL f1 =====
NUC1     13C
P1       10.00 usec
PL1     -2.00 dB
PL1W    59.71607590 W
SFO1    100.6499905 MHz

===== CHANNEL f2 =====
CPDPRG2  waltz16
NUC2     1H
PCPD2    80.00 usec
PL2     -4.00 dB
PL12    14.98 dB
PL13    13.89 dB
PL2W    23.09303856 W
PL12W   0.29206610 W
PL13W   0.37538856 W
SFO2    400.2316009 MHz
SI       32768
SF      100.6379044 MHz
WDW      EM
SSB      0
LB       1.00 Hz
GB       0
PC       1.40
  
```

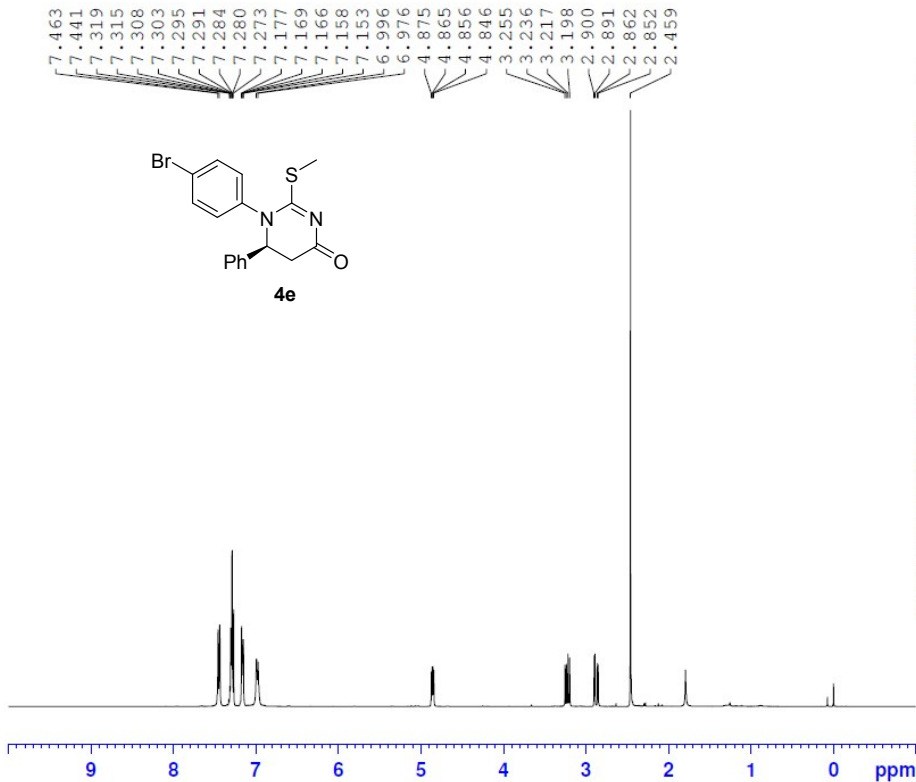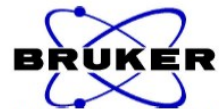

```

NAME      RX-701-2-1-1HNMR
EXPNO     1
PROCNO    1
Date_     20191220
Time      20.03
INSTRUM   spect
PROBHD    5 mm PABBO BB-
PULPROG   zg30
TD         65536
SOLVENT   CDCl3
NS         8
DS         0
SWH       8223.685 Hz
FIDRES    0.125483 Hz
AQ         3.9846387 sec
RG         128
DW         60.800 usec
DE         6.50 usec
TE         299.3 K
D1         1.00000000 sec
TD0        1
  
```

```

===== CHANNEL f1 =====
NUC1      1H
P1         9.00 usec
PL1        -4.00 dB
PL1W      23.09303856 W
SF01      400.2324716 MHz
SI         32768
SF         400.2300153 MHz
WDW        EM
SSB         0
LB         0.30 Hz
GB         0
PC         1.00
  
```

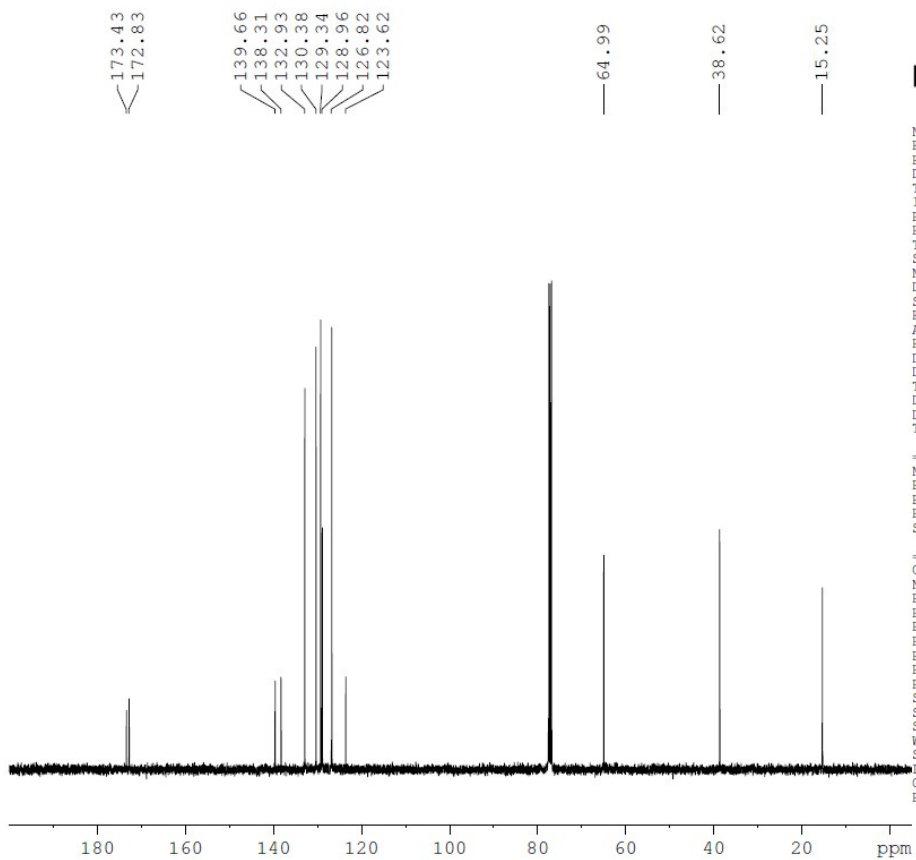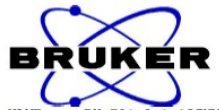

```

NAME      RX-701-2-1-13CNMR
EXPNO     1
PROCNO    1
Date_     20191220
Time      20.11
INSTRUM   spect
PROBHD    5 mm PABBO BB-
PULPROG   zgpg30
TD         65536
SOLVENT   CDCl3
NS         326
DS         4
SWH       25252.525 Hz
FIDRES    0.385323 Hz
AQ         1.2976629 sec
RG         32
DW         19.800 usec
DE         6.50 usec
TE         300.4 K
D1         2.00000000 sec
D11        0.03000000 sec
TD0        100
  
```

```

===== CHANNEL f1 =====
NUC1      13C
P1        10.00 usec
PL1        -2.00 dB
PL1W      59.71607590 W
SF01      100.6499905 MHz
  
```

```

===== CHANNEL f2 =====
CPDPRG2   waltz16
NUC2      1H
PCPD2     80.00 usec
PL2        -4.00 dB
PL12      14.98 dB
PL13      13.89 dB
PL2W      23.09303856 W
PL12W     0.29206610 W
PL13W     0.37538856 W
SFO2      400.2316009 MHz
SI         32768
SF         100.6379043 MHz
WDW        EM
SSB         0
LB         1.00 Hz
GB         0
PC         1.40
  
```

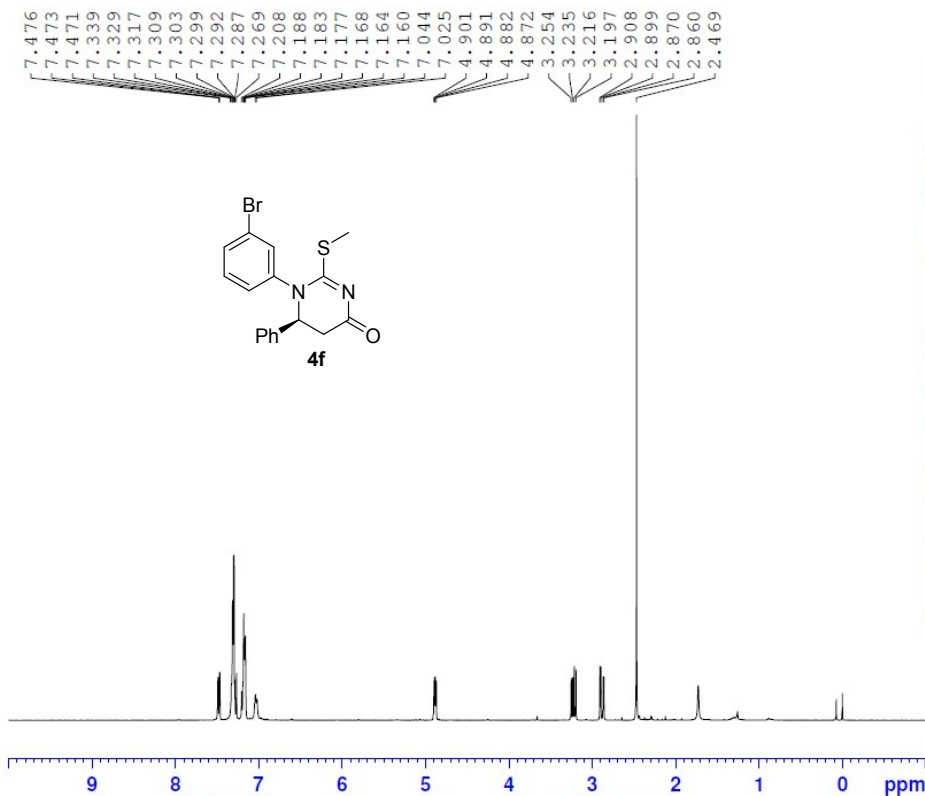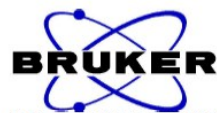

```

NAME RX-699-1-1-1HNMR
EXPNO 1
PROCNO 1
Date_ 20191220
Time 15.01
INSTRUM spect
PROBHD 5 mm PABBO BB-
PULPROG zg30
TD 65536
SOLVENT CDC13
NS 8
DS 0
SWH 8223.685 Hz
FIDRES 0.125483 Hz
AQ 3.9846387 sec
RG 144
DW 60.800 usec
DE 6.50 usec
TE 299.9 K
D1 1.00000000 sec
TDO 1

```

```

===== CHANNEL f1 =====
NUC1 1H
P1 9.00 usec
PL1 -4.00 dB
PL1W 23.09303856 W
SFO1 400.2324716 MHz
SI 32768
SF 400.2300168 MHz
WDW EM
SSB 0
LB 0.30 Hz
GB 0
PC 1.00

```

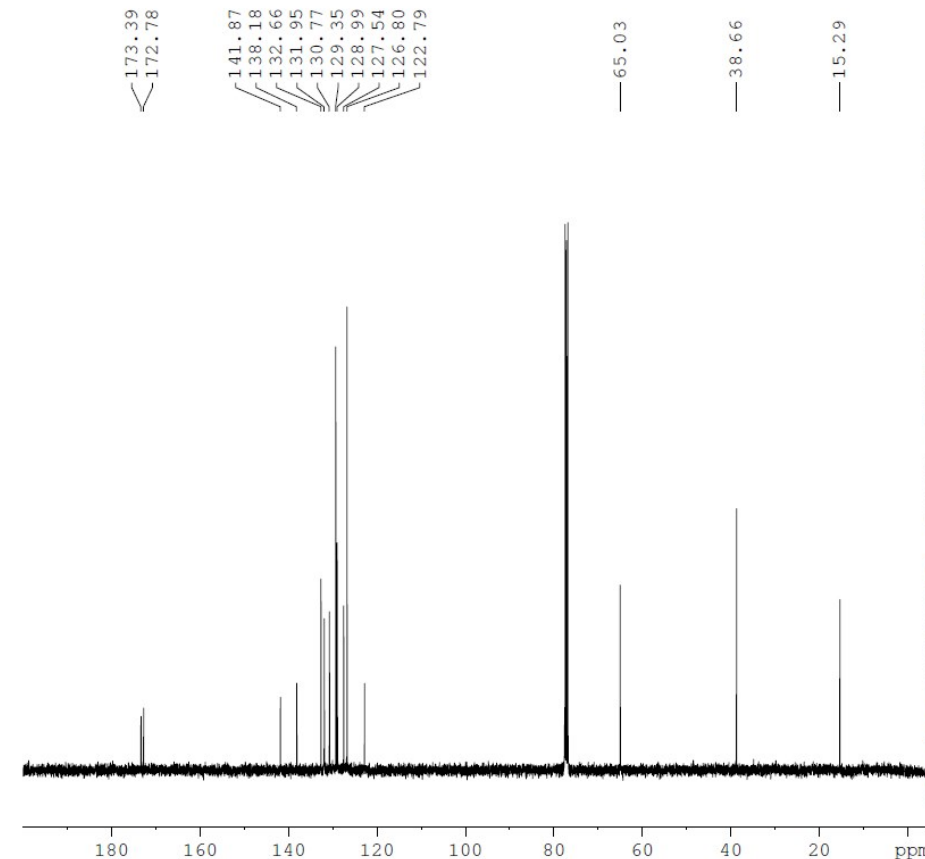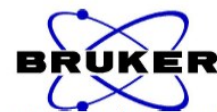

```

NAME RX-699-1-1-13CNMR
EXPNO 1
PROCNO 1
Date_ 20191220
Time 15.11
INSTRUM spect
PROBHD 5 mm PABBO BB-
PULPROG zgpg30
TD 65536
SOLVENT CDC13
NS 300
DS 4
SWH 25252.525 Hz
FIDRES 0.385323 Hz
AQ 1.2976629 sec
RG 32
DW 19.800 usec
DE 6.50 usec
TE 300.6 K
D1 2.00000000 sec
D11 0.03000000 sec
TDO 100

```

```

===== CHANNEL f1 =====
NUC1 13C
P1 10.00 usec
PL1 -2.00 dB
PL1W 59.71607590 W
SFO1 100.6499905 MHz

```

```

===== CHANNEL f2 =====
CPDPRG2 waltz16
NUC2 1H
PCPD2 80.00 usec
PL2 -4.00 dB
PL12 14.98 dB
PL13 13.89 dB
PL2W 23.09303856 W
PL12W 0.29206610 W
PL13W 0.37538856 W
SFO2 400.2316009 MHz
SI 32768
SF 100.6379025 MHz
WDW EM
SSB 0
LB 1.00 Hz
GB 0
PC 1.40

```

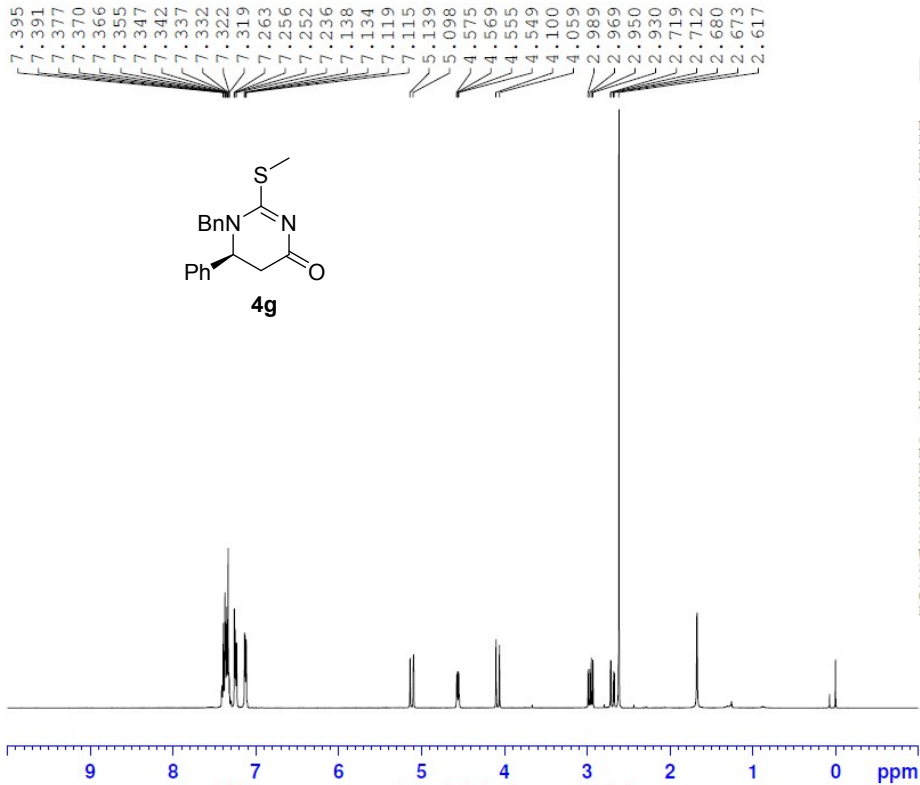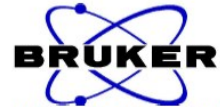

```

NAME      RX-701-3-1-1HNMR
EXPNO     1
PROCNO    1
Date_     20191220
Time      20.30
INSTRUM   spect
PROBHD    5 mm PABBO BB-
PULPROG   zg30
TD         65536
SOLVENT   CDCl3
NS         8
DS         0
SWH        8223.685 Hz
FIDRES     0.125483 Hz
AQ         3.9846387 sec
RG         161
DW         60.800 usec
DE         6.50 usec
TE         300.0 K
D1         1.00000000 sec
TD0        1
  
```

```

===== CHANNEL f1 =====
NUC1      1H
P1        9.00 usec
PL1       -4.00 dB
PL1W      23.09303856 W
SFO1      400.2324716 MHz
SI         32768
SF         400.2300192 MHz
WDW        EM
SSB        0
LB         0.30 Hz
GB         0
PC         1.00
  
```

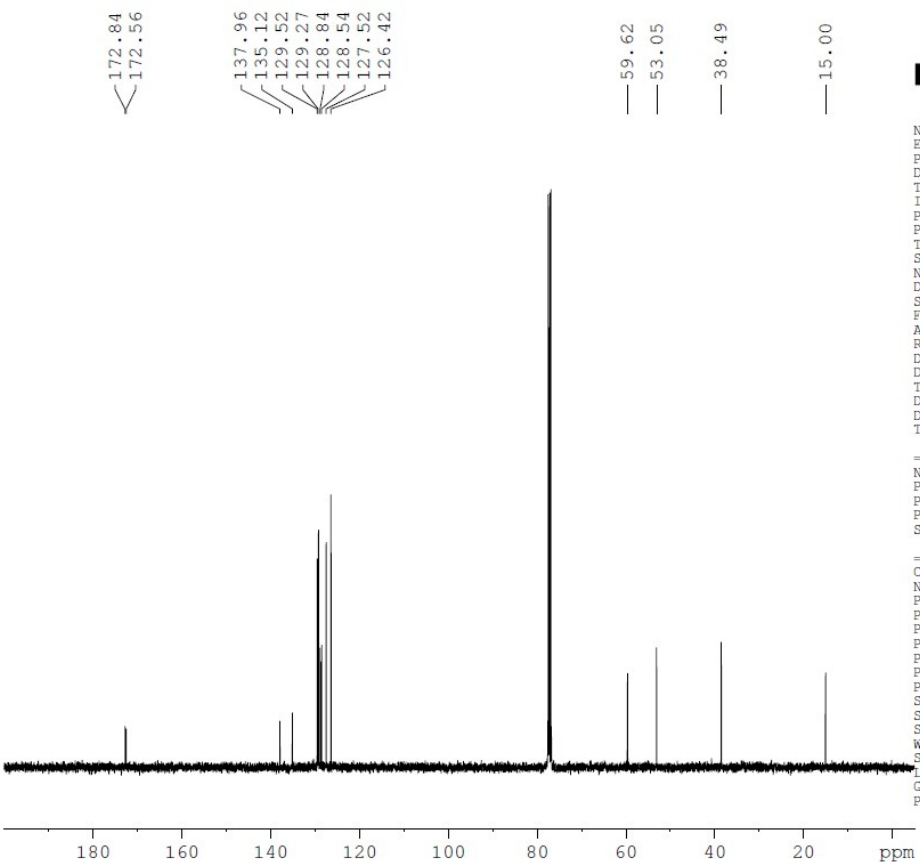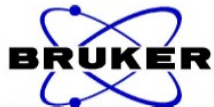

```

NAME      RX-701-3-1-13CNMR
EXPNO     1
PROCNO    1
Date_     20191220
Time      20.39
INSTRUM   spect
PROBHD    5 mm PABBO BB-
PULPROG   zgpg30
TD         65536
SOLVENT   CDCl3
NS         366
DS         4
SWH        25252.525 Hz
FIDRES     0.385323 Hz
AQ         1.2976629 sec
RG         36
DW         19.800 usec
DE         6.50 usec
TE         300.8 K
D1         2.00000000 sec
D11        0.03000000 sec
TD0        100
  
```

```

===== CHANNEL f1 =====
NUC1      13C
P1        10.00 usec
PL1       -2.00 dB
PL1W      59.71607590 W
SFO1      100.6499905 MHz
  
```

```

===== CHANNEL f2 =====
CPDPRG2   waltz16
NUC2      1H
PCPD2     80.00 usec
PL2       -4.00 dB
PL12      14.98 dB
PL13      13.89 dB
PL2W      23.09303856 W
PL12W     0.29206610 W
PL13W     0.37538856 W
SFO2      400.2316009 MHz
SI         32768
SF         100.6379012 MHz
WDW        EM
SSB        0
LB         1.00 Hz
GB         0
PC         1.40
  
```



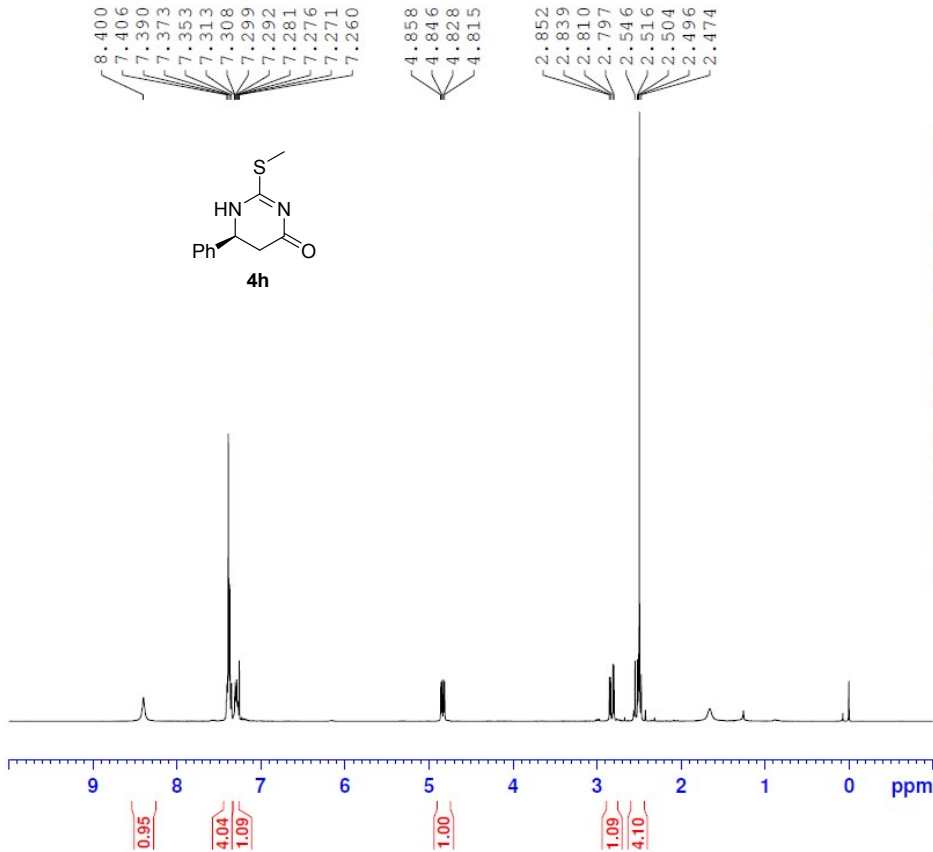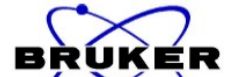

```

NAME RX-777-10-3-1H
EXPNO 3
PROCNO 1
Date_ 20200901
Time 21.05 h
INSTRUM spect
PROBHD Z108618_0239 (
PULPROG zg30
TD 65536
SOLVENT CDC13
NS 8
DS 0
SWH 8223.685 Hz
FIDRES 0.250967 Hz
AQ 3.9846387 sec
RG 144
DW 60.800 usec
DE 6.50 usec
TE 298.1 K
D1 1.00000000 sec
TDO 1
SFO1 400.1324710 MHz
NUC1 1H
P0 5.00 usec
P1 15.00 usec
SI 32768
SF 400.1300101 MHz
WDW EM
SSB 0
LB 0.30 Hz
GB 0
PC 1.00
  
```

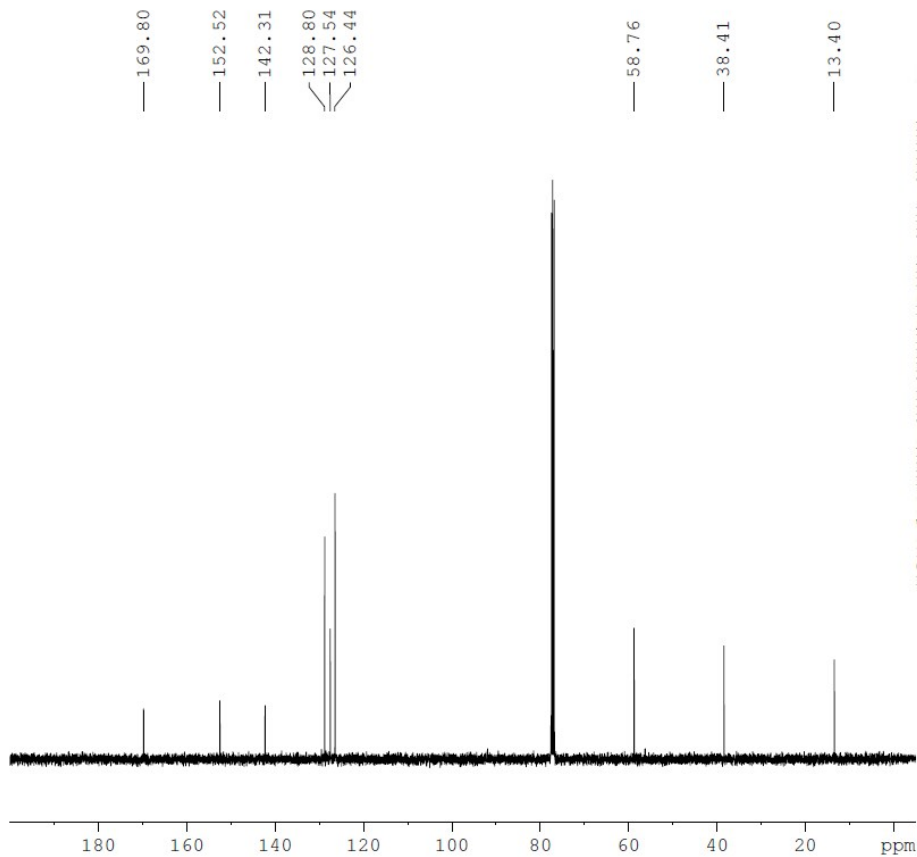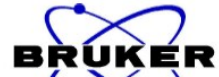

```

NAME RX-777-10-3-13C
EXPNO 4
PROCNO 1
Date_ 20200901
Time 21.28 h
INSTRUM spect
PROBHD Z108618_0239 (
PULPROG zgpg30
TD 65536
SOLVENT CDC13
NS 312
DS 0
SWH 25252.525 Hz
FIDRES 0.770646 Hz
AQ 1.2976629 sec
RG 144
DW 19.800 usec
DE 6.50 usec
TE 298.7 K
D1 2.00000000 sec
D11 0.03000000 sec
TDO 100
SFO1 100.6248425 MHz
NUC1 13C
P0 3.33 usec
P1 10.00 usec
SI 32768
SF 100.6127555 MHz
WDW EM
SSB 0
LB 1.00 Hz
GB 0
PC 1.40
  
```

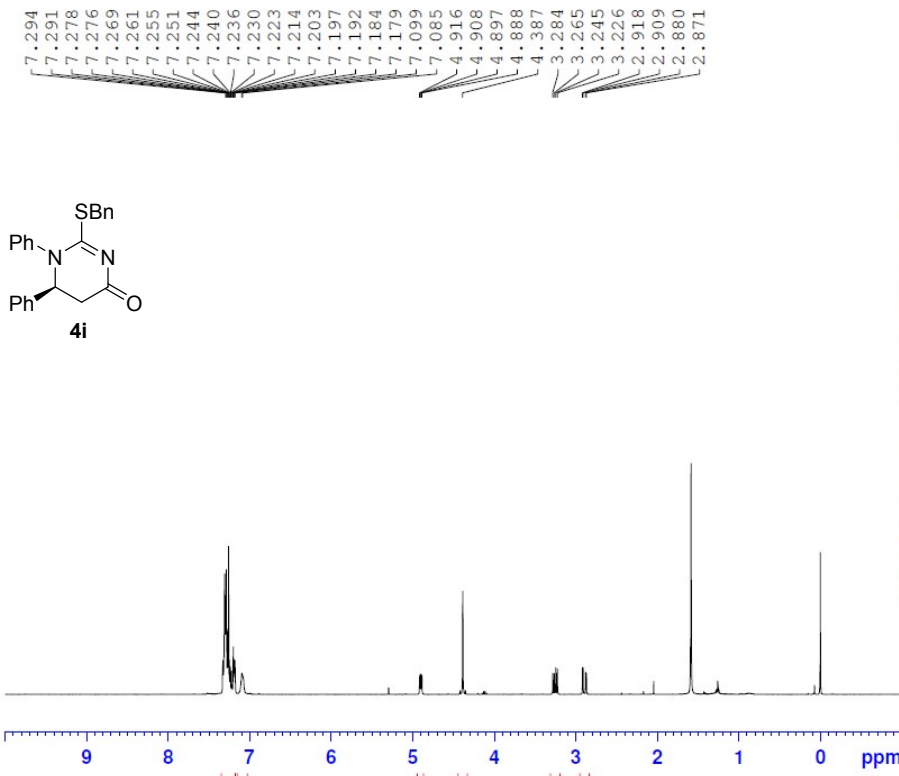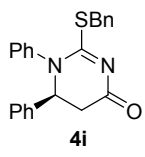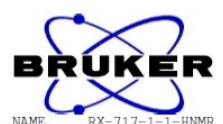

```

NAME      RX-717-1-1-HNMR
EXPNO     1
PROCNO    1
Date_     20200219
Time      23.20
INSTRUM   spect
PROBHD    5 mm PABBO BB-
PULPROG   zg30
TD        65536
SOLVENT   CDCl3
NS        8
DS        0
SWH       8223.685 Hz
FIDRES    0.125483 Hz
AQ        3.9846387 sec
RG        203
DW        60.800 usec
DE        6.50 usec
TE        299.1 K
D1        1.00000000 sec
D10       1
  
```

```

===== CHANNEL f1 =====
NUC1      1H
P1        9.00 usec
PL1       -4.00 dB
PL1W     23.09303856 W
SFO1     400.2324716 MHz
SI        32768
SF        400.2300203 MHz
WDW       EM
SSB       0
LB        0.30 Hz
GB        0
PC        1.00
  
```

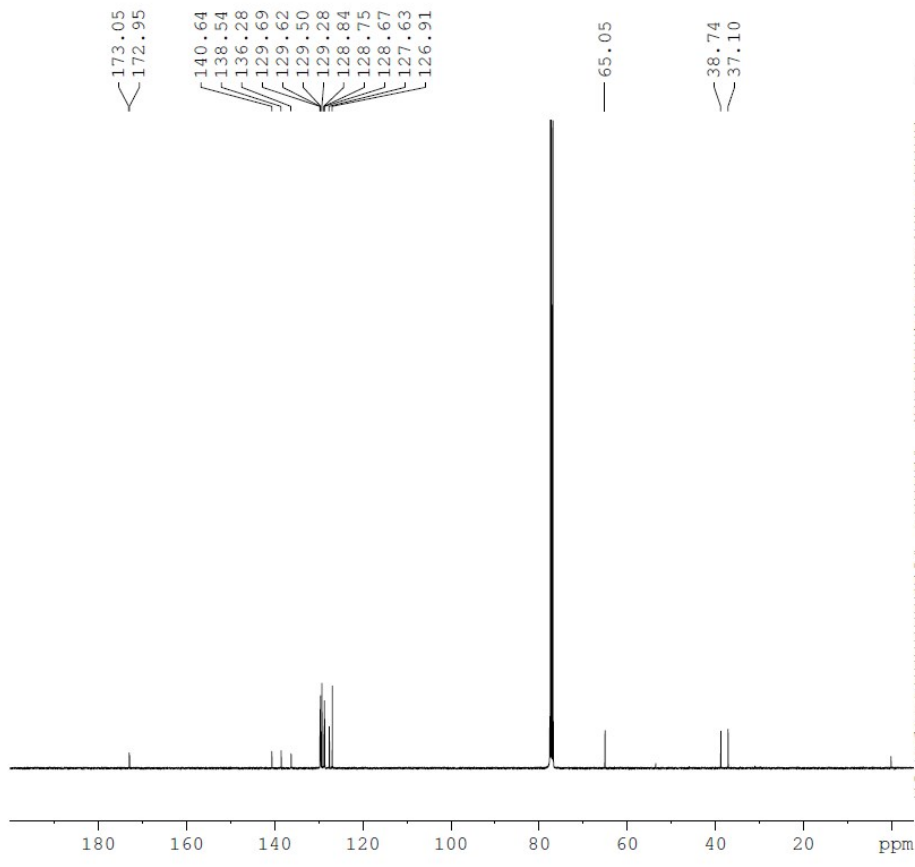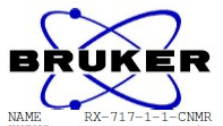

```

NAME      RX-717-1-1-CNMR
EXPNO     1
PROCNO    1
Date_     20200219
Time      23.30
INSTRUM   spect
PROBHD    5 mm PABBO BB-
PULPROG   zgpg30
TD        65536
SOLVENT   CDCl3
NS        10000
DS        4
SWH       25252.525 Hz
FIDRES    0.385323 Hz
AQ        1.2976629 sec
RG        22.6
DW        19.800 usec
DE        6.50 usec
TE        300.1 K
D1        2.00000000 sec
D11       0.03000000 sec
D10       100
  
```

```

===== CHANNEL f1 =====
NUC1      13C
P1        10.00 usec
PL1       -2.00 dB
PL1W     59.71607590 W
SFO1     100.6499905 MHz
  
```

```

===== CHANNEL f2 =====
CPDPRG2   waltz16
NUC2      1H
PCPD2     80.00 usec
PL2       -4.00 dB
PL12     14.98 dB
PL13     13.89 dB
PL2W     23.09303856 W
PL12W    0.29206610 W
PL13W    0.37538856 W
SFO2     400.2316009 MHz
SI        32768
SF        100.6378991 MHz
WDW       EM
SSB       0
LB        1.00 Hz
GB        0
PC        1.40
  
```

7.443  
7.439  
7.422  
7.381  
7.373  
7.366  
7.360  
7.356  
7.348  
7.341  
7.329  
7.324  
7.321  
7.308  
7.305  
7.301  
7.287  
7.260  
7.204  
7.199  
7.185  
7.138  
7.132  
7.118  
7.114  
7.117  
5.077  
4.588  
4.567  
4.556  
4.547  
4.540  
4.527  
4.494  
4.062  
4.022  
2.984  
2.964  
2.946  
2.926  
2.727  
2.720  
2.688  
2.681

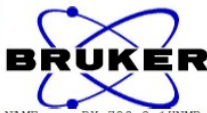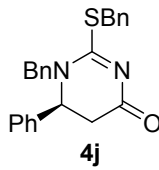

```

NAME      RX-728-2-1HNMR
EXPNO     1
PROCNO    1
Date_     20200316
Time      10.54
INSTRUM   spect
PROBHD    5 mm PABBO BB-
PULPROG   zg30
TD         65536
SOLVENT   CDC13
NS         8
DS         0
SWH       8223.685 Hz
FIDRES    0.125483 Hz
AQ        3.9846387 sec
RG         161
DW        60.800 usec
DE        6.50 usec
TE        297.2 K
D1        1.00000000 sec
TD0       1

===== CHANNEL f1 =====
NUC1      1H
P1        9.00 usec
PL1       -4.00 dB
PL1W      23.09303856 W
SFO1      400.2324716 MHz
SI        32768
SF        400.2300206 MHz
WDW       EM
SSB       0
LB        0.30 Hz
GB        0
PC        1.00
  
```

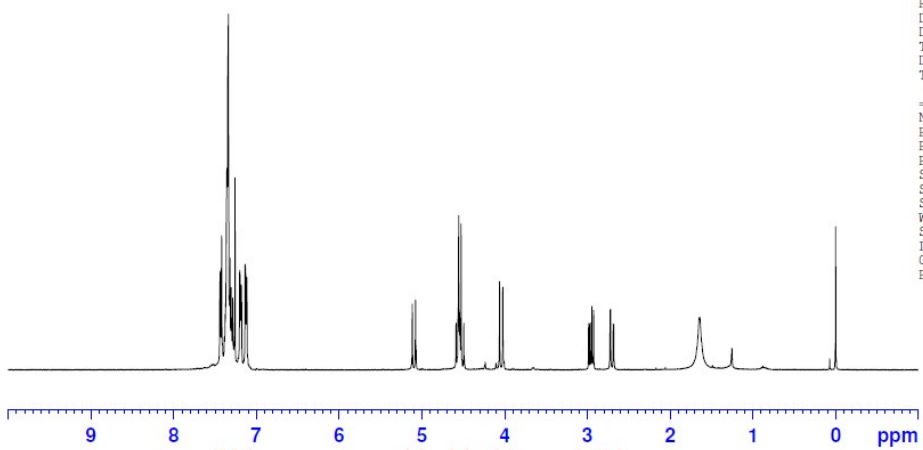

172.47  
171.86  
137.72  
136.11  
134.87  
129.48  
129.41  
129.12  
128.72  
128.41  
127.68  
127.41  
126.30  
59.38  
52.97  
38.39  
36.76

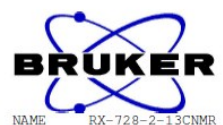

```

NAME      RX-728-2-13CNMR
EXPNO     1
PROCNO    1
Date_     20200316
Time      11.07
INSTRUM   spect
PROBHD    5 mm PABBO BB-
PULPROG   zgpg30
TD         65536
SOLVENT   CDC13
NS         442
DS         4
SWH       25252.525 Hz
FIDRES    0.385323 Hz
AQ        1.2976629 sec
RG         25.4
DW        19.800 usec
DE        6.50 usec
TE        298.6 K
D1        2.00000000 sec
D11       0.03000000 sec
TD0       100

===== CHANNEL f1 =====
NUC1      13C
P1        10.00 usec
PL1       -2.00 dB
PL1W      59.71607590 W
SFO1      100.6499905 MHz

===== CHANNEL f2 =====
CPDPRG2   waltz16
NUC2      1H
PCPD2     80.00 usec
PL2       -4.00 dB
PL12      14.98 dB
PL13      13.89 dB
PL2W      23.09303856 W
PL12W     0.29206610 W
PL13W     0.37538856 W
SFO2      400.2316009 MHz
SI        32768
SF        100.6379140 MHz
WDW       EM
SSB       0
LB        1.00 Hz
GB        0
PC        1.40
  
```

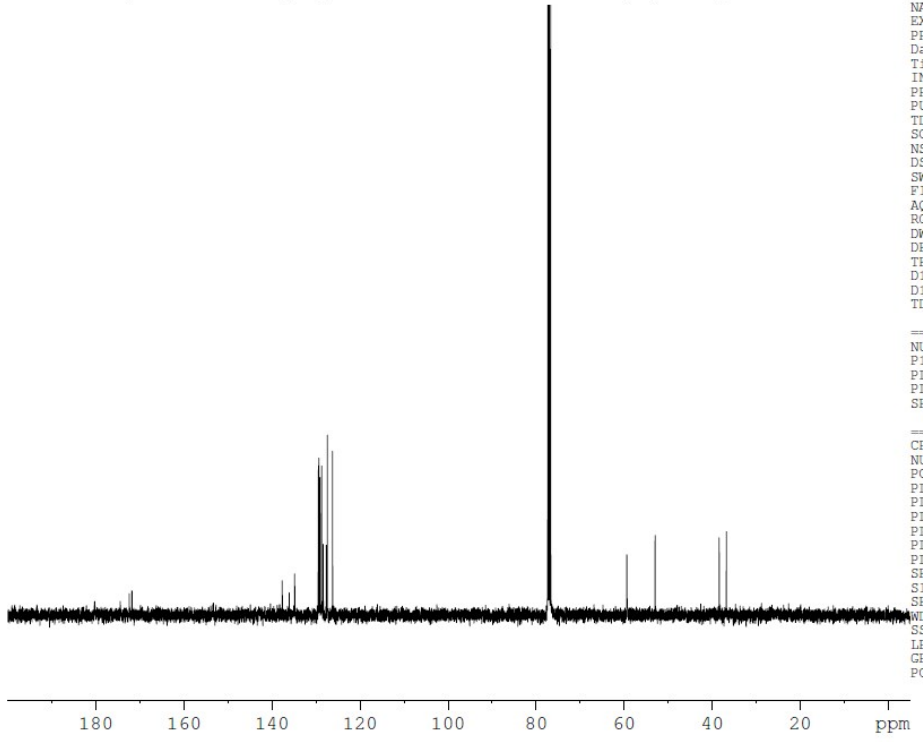

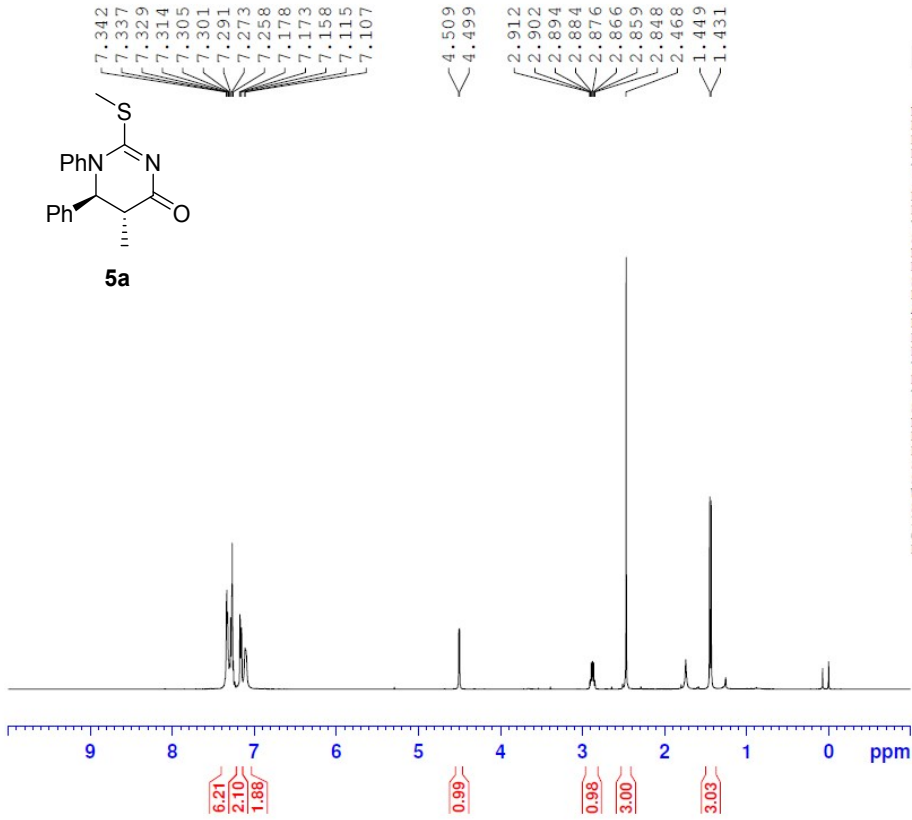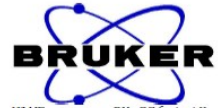

```

NAME      RX-776-1-1H
EXPNO     34
PROCNO    1
Date_     20200828
Time      20.35 h
INSTRUM   spect
PROBHD    Z108618_0239 (
PULPROG   zg30
TD         65536
SOLVENT   CDCl3
NS         8
DS         0
SWH        8223.685 Hz
FIDRES     0.250967 Hz
AQ         3.9846387 sec
RG         128
DW         60.800 usec
DE         6.50 usec
TE         298.4 K
D1         1.00000000 sec
TDO        1
SFO1       400.1324710 MHz
NUC1       1H
PO         5.00 usec
P1         15.00 usec
SI         32768
SF         400.1300066 MHz
WDW        EM
SSB        0
LB         0.30 Hz
GB         0
PC         1.00
  
```

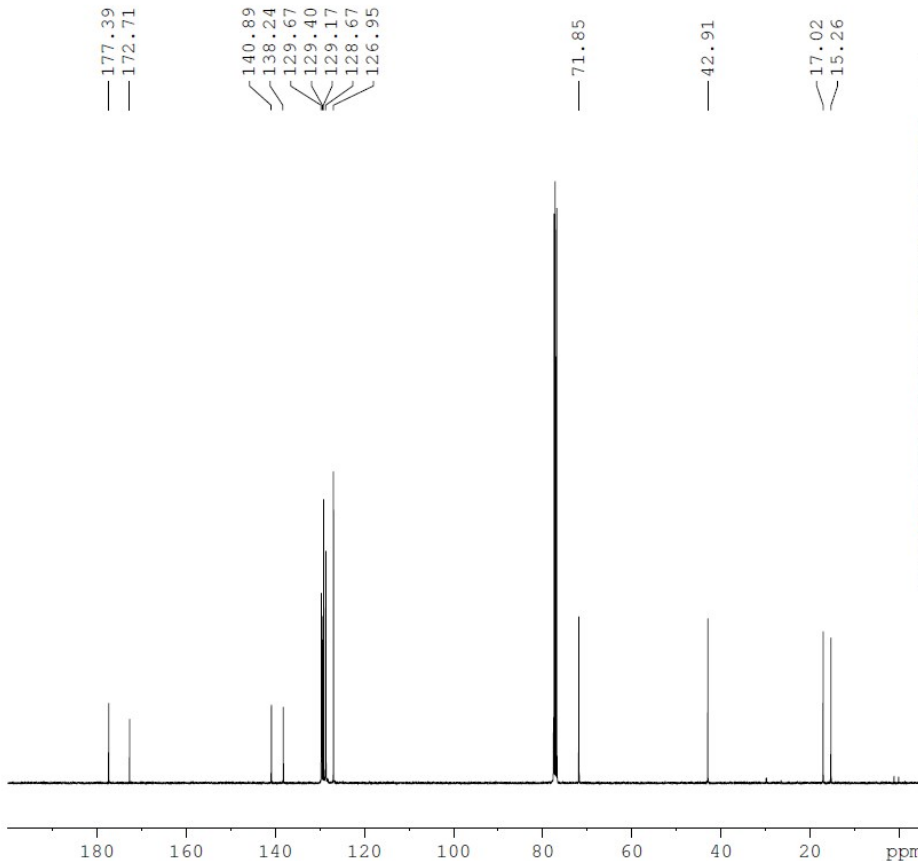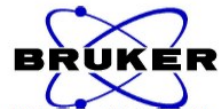

```

NAME      RX-776-1-13C
EXPNO     35
PROCNO    1
Date_     20200829
Time      6.03 h
INSTRUM   spect
PROBHD    Z108618_0239 (
PULPROG   zgpg30
TD         65536
SOLVENT   CDCl3
NS         10000
DS         0
SWH        25252.525 Hz
FIDRES     0.770646 Hz
AQ         1.2976629 sec
RG         181
DW         19.800 usec
DE         6.50 usec
TE         298.7 K
D1         2.00000000 sec
D11        0.03000000 sec
TDO        100
SFO1       100.6248425 MHz
NUC1       13C
PO         3.33 usec
P1         10.00 usec
SI         32768
SF         100.6127578 MHz
WDW        EM
SSB        0
LB         1.00 Hz
GB         0
PC         1.40
  
```

7.896  
7.893  
7.875  
7.382  
7.364  
7.345  
7.312  
7.309  
7.299  
7.290  
7.287  
7.277  
7.267  
7.260  
7.053  
7.044  
7.033  
5.715  
5.702  
5.309  
5.297

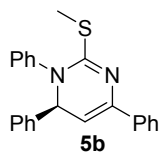

— 2.500

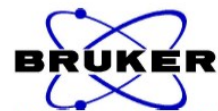

```

NAME      RX-776-2-1H (2nd)
EXPNO     1
PROCNO    1
Date_     20200922
Time      20.59
INSTRUM   spect
PROBHD    5 mm PABBO BB-
PULPROG   zg30
TD         65536
SOLVENT   CDC13
NS         64
DS         0
SWH       8223.685 Hz
FIDRES    0.125483 Hz
AQ         3.9846387 sec
RG         144
DW         60.800 usec
DE         6.50 usec
TE         298.3 K
D1         1.00000000 sec
TD0        1
  
```

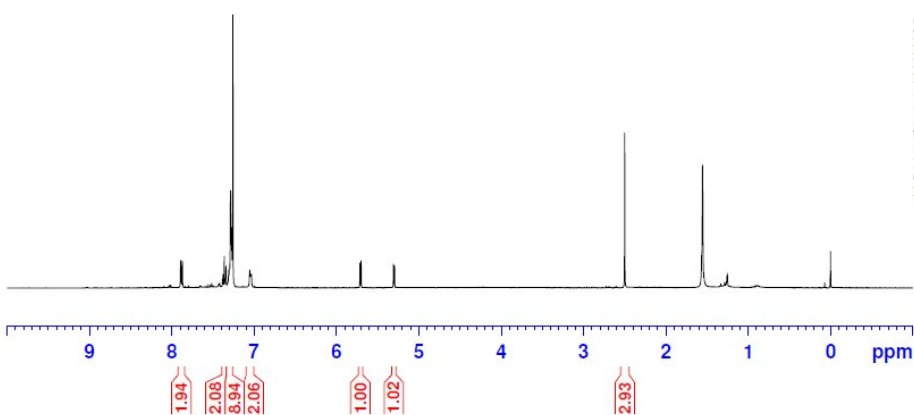

```

===== CHANNEL f1 =====
NUC1      1H
P1         7.50 usec
PL1       -3.38 dB
PL1W      20.00124741 W
SF01      400.2324716 MHz
SI         32768
SF         400.2300202 MHz
WDW        EM
SSB         0
LB         0.30 Hz
GB         0
PC         1.00
  
```

158.74  
143.65  
142.27  
140.60  
138.46  
129.32  
129.19  
128.84  
128.29  
128.26  
128.23  
127.95  
127.74  
125.61  
103.12

— 65.84

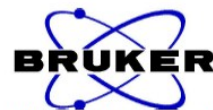

```

NAME      RX-776-2-13C (2nd)
EXPNO     1
PROCNO    1
Date_     20200922
Time      21.10
INSTRUM   spect
PROBHD    5 mm PABBO BB-
PULPROG   zgpg30
TD         65536
SOLVENT   CDC13
NS         10000
DS         4
SWH       25252.525 Hz
FIDRES    0.385323 Hz
AQ         1.2976629 sec
RG         114
DW         19.800 usec
DE         6.50 usec
TE         299.3 K
D1         2.00000000 sec
D11        0.03000000 sec
TD0        100
  
```

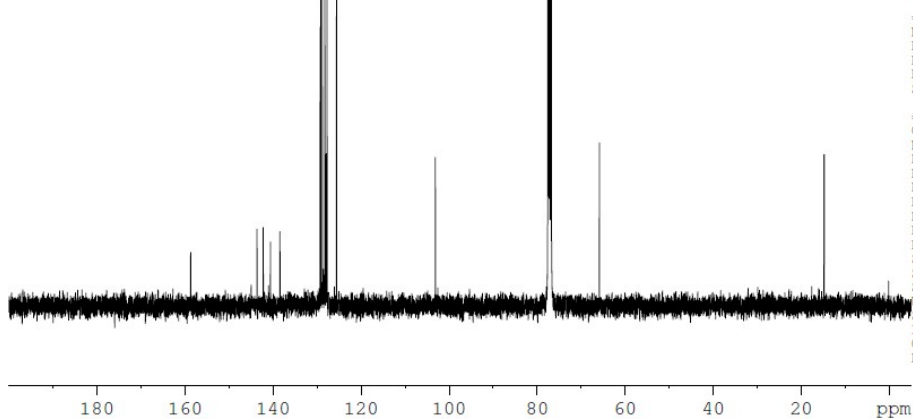

```

===== CHANNEL f1 =====
NUC1      13C
P1         10.00 usec
PL1       -2.69 dB
PL1W      69.99890900 W
SF01      100.6499905 MHz

===== CHANNEL f2 =====
CPDPRG2   waltz16
NUC2      1H
PCPD2     80.00 usec
PL2       -3.38 dB
PL12      17.18 dB
PL13      13.89 dB
PL2W      20.02078438 W
PL12W     0.17598718 W
PL13W     0.37538856 W
SF02      400.2316009 MHz
SI         32768
SF         100.6379010 MHz
WDW        EM
SSB         0
LB         1.00 Hz
GB         0
PC         1.40
  
```

7.351  
7.345  
7.336  
7.332  
7.318  
7.302  
7.298  
7.292  
7.268  
7.263  
7.257  
7.246  
7.243  
7.240  
7.229  
7.224  
7.218  
7.215  
7.209  
7.205  
7.197  
7.194  
7.188  
5.091  
5.085  
5.074  
5.068  
3.365  
3.348  
3.324  
3.307  
2.969  
2.962  
2.928

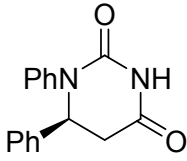

5c

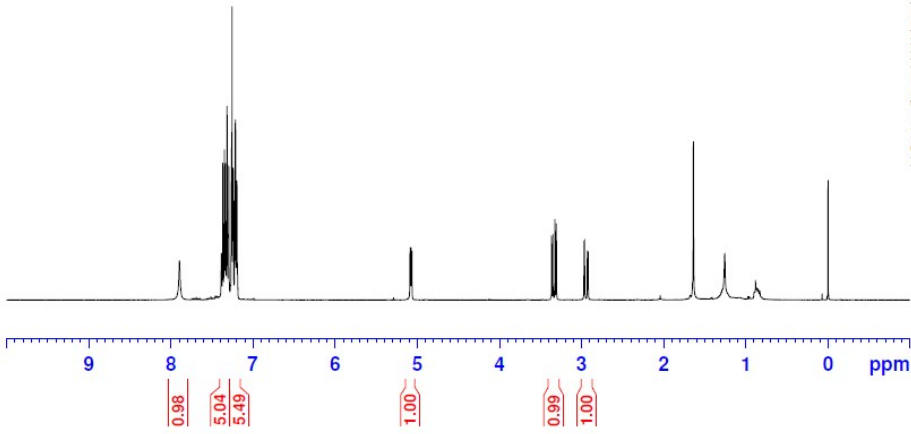

168.25  
151.82  
140.73  
138.60  
129.44  
129.30  
128.69  
127.22  
126.04  
125.88  
60.05  
39.38

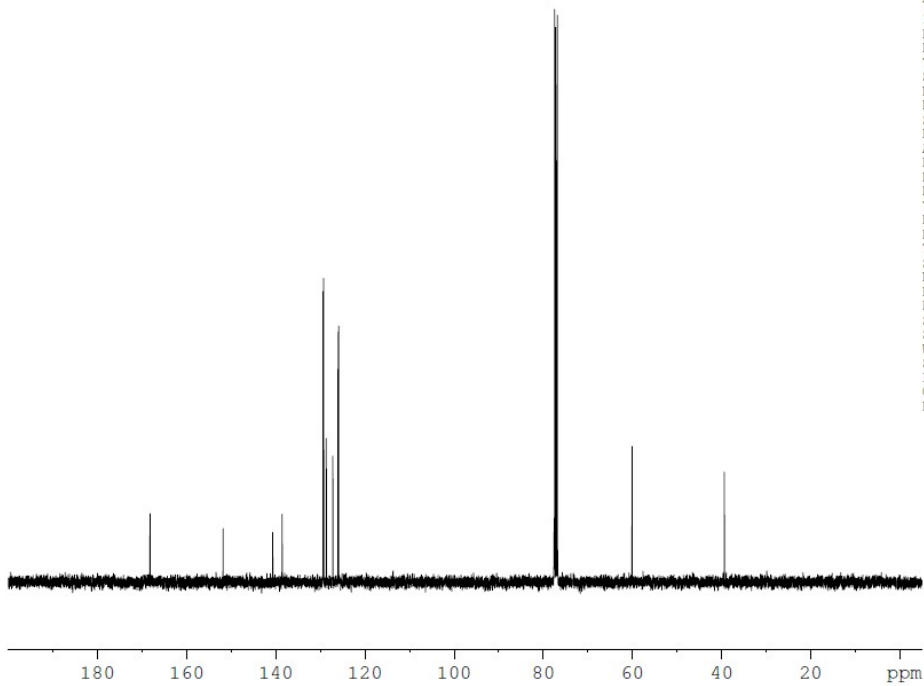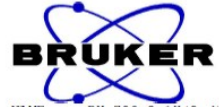

NAME RX-789-2-1H (2nd)  
EXPNO 6  
PROCNO 1  
Date\_ 20201009  
Time 21.11 h  
INSTRUM spect  
PROBHD Z108618\_0238 (  
PULPROG zg30  
TD 65536  
SOLVENT CDC13  
NS 8  
DS 0  
SWH 8223.685 Hz  
FIDRES 0.250967 Hz  
AQ 3.9846387 sec  
RG 161  
DW 60.800 usec  
DE 6.50 usec  
TE 298.4 K  
D1 1.00000000 sec  
TDO 1  
SFO1 400.1324710 MHz  
NUC1 1H  
PO 5.00 usec  
P1 15.00 usec  
SI 32768  
SF 400.1300108 MHz  
WDW EM  
SSB 0  
LB 0.30 Hz  
GB 0  
PC 1.00

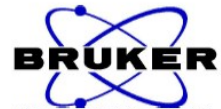

NAME RX-789-2-13C (2nd)  
EXPNO 7  
PROCNO 1  
Date\_ 20201009  
Time 21.28 h  
INSTRUM spect  
PROBHD Z108618\_0238 (  
PULPROG zgpg30  
TD 65536  
SOLVENT CDC13  
NS 239  
DS 0  
SWH 25252.525 Hz  
FIDRES 0.770646 Hz  
AQ 1.2976629 sec  
RG 144  
DW 19.800 usec  
DE 6.50 usec  
TE 298.7 K  
D1 2.00000000 sec  
D11 0.03000000 sec  
TDO 100  
SFO1 100.6248425 MHz  
NUC1 13C  
PO 3.33 usec  
P1 10.00 usec  
SI 32768  
SF 100.6127555 MHz  
WDW EM  
SSB 0  
LB 1.00 Hz  
GB 0  
PC 1.40

7.418  
7.414  
7.396  
7.385  
7.384  
7.378  
7.366  
7.362  
7.350  
7.347  
7.321  
7.317  
7.300  
7.272  
7.265  
7.260  
7.252  
7.250  
7.232  
6.925  
6.923  
6.909  
6.906  
6.889  
6.711  
4.986  
4.972  
4.957  
4.832  
4.824  
4.801  
4.793  
4.646  
4.639  
4.616  
4.609  
2.962  
2.946  
2.921  
2.905  
2.789  
2.776  
2.748  
2.736

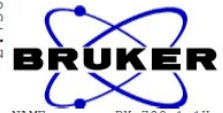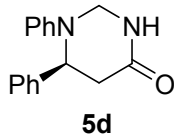

```

NAME      RX-789-1-1H
EXPNO     4
PROCNO    1
Date_     20201016
Time      11.00 h
INSTRUM   spect
PROBHD    Z116098_0542 (
PULPROG   zg30
TD         65536
SOLVENT   CDC13
NS         8
DS         0
SWH        8223.685 Hz
FIDRES     0.250967 Hz
AQ         3.9846387 sec
RG         128
DW         60.800 usec
DE         6.50 usec
TE         298.3 K
D1         1.00000000 sec
TD0        1
SF01       400.2324716 MHz
NUC1       1H
PO         3.33 usec
P1         10.00 usec
SI         32768
SF         400.2300099 MHz
WDW        EM
SSB        0
LB         0.30 Hz
GB         0
PC         1.00
  
```

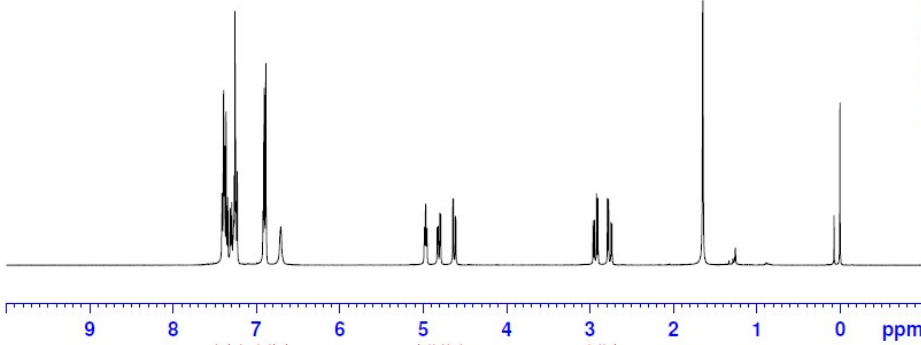

171.23  
148.29  
141.01  
129.58  
129.06  
127.95  
126.64  
120.80  
116.56  
59.59  
56.01  
36.90

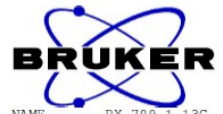

```

NAME      RX-789-1-13C
EXPNO     5
PROCNO    1
Date_     20201016
Time      11.22 h
INSTRUM   spect
PROBHD    Z116098_0542 (
PULPROG   zgpg30
TD         65536
SOLVENT   CDC13
NS         333
DS         4
SWH        25252.525 Hz
FIDRES     0.770646 Hz
AQ         1.2976629 sec
RG         114
DW         19.800 usec
DE         6.50 usec
TE         298.8 K
D1         2.00000000 sec
D11        0.03000000 sec
TD0        100
SF01       100.6499905 MHz
NUC1       13C
PO         3.33 usec
P1         10.00 usec
SI         32768
SF         100.6379001 MHz
WDW        EM
SSB        0
LB         1.00 Hz
GB         0
PC         1.40
  
```

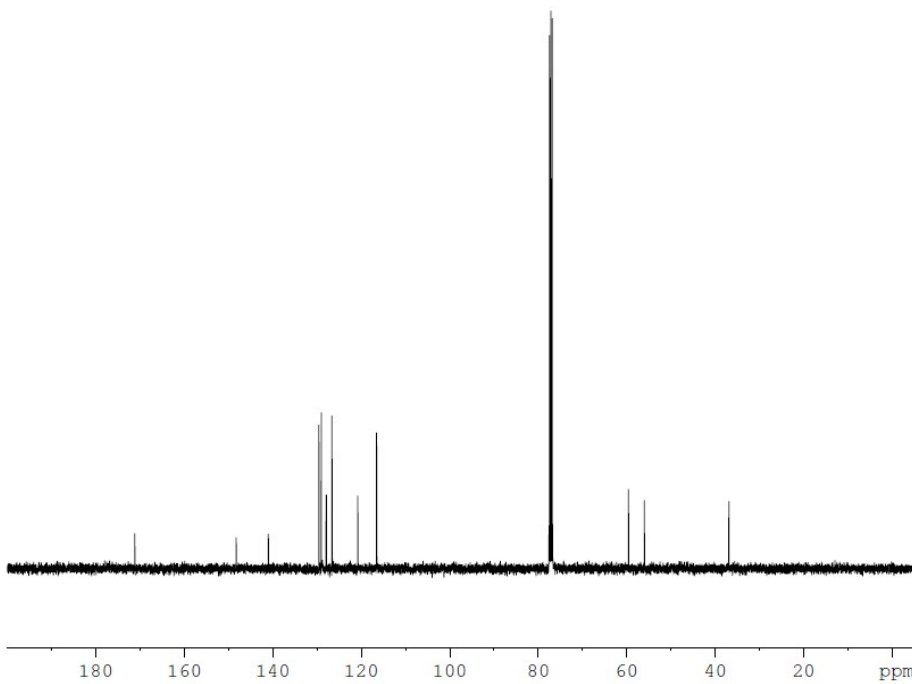

HPLC Data:

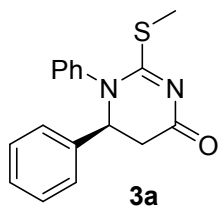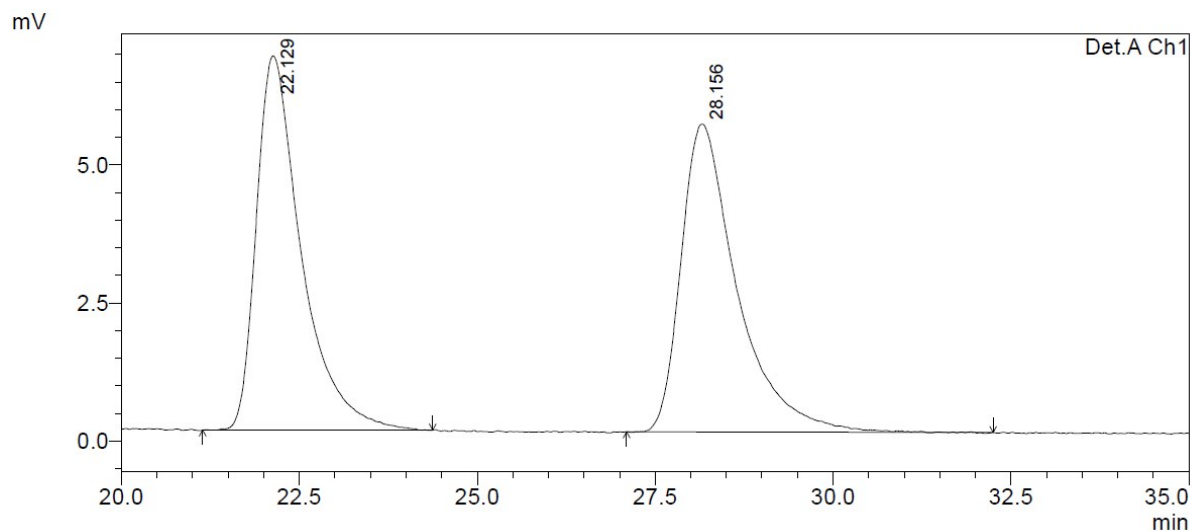

Detector A Ch1 254nm

| Peak# | Ret. Time | Area   | Height | Area %  | Height % |
|-------|-----------|--------|--------|---------|----------|
| 1     | 22.129    | 297217 | 6771   | 49.424  | 54.869   |
| 2     | 28.156    | 304144 | 5569   | 50.576  | 45.131   |
| Total |           | 601361 | 12340  | 100.000 | 100.000  |

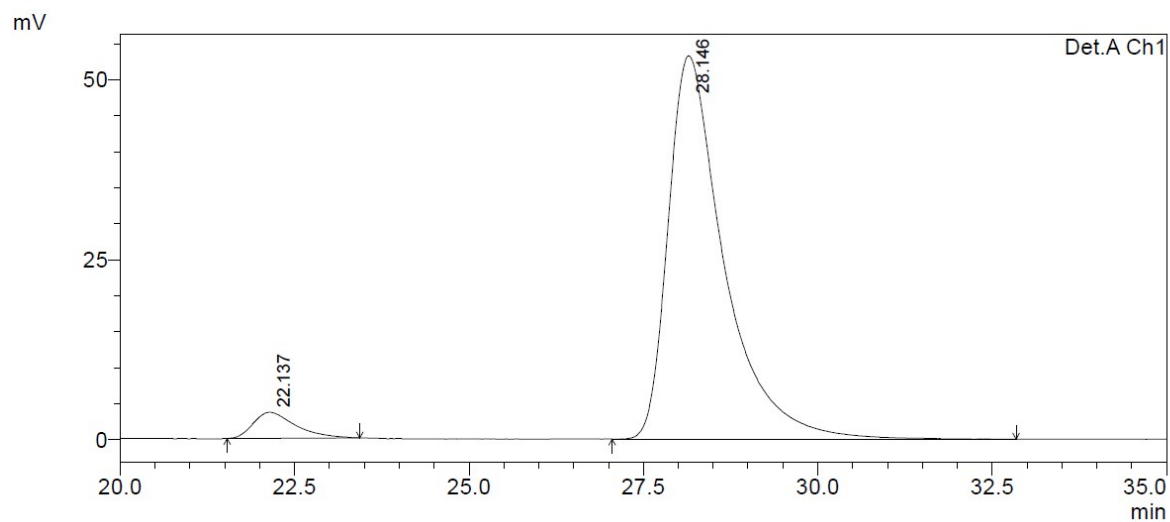

Detector A Ch1 254nm

| Peak# | Ret. Time | Area    | Height | Area %  | Height % |
|-------|-----------|---------|--------|---------|----------|
| 1     | 22.137    | 151189  | 3606   | 4.858   | 6.345    |
| 2     | 28.146    | 2961267 | 53222  | 95.142  | 93.655   |
| Total |           | 3112456 | 56828  | 100.000 | 100.000  |



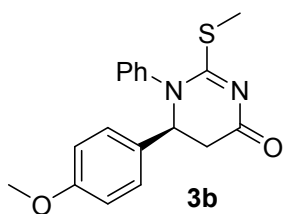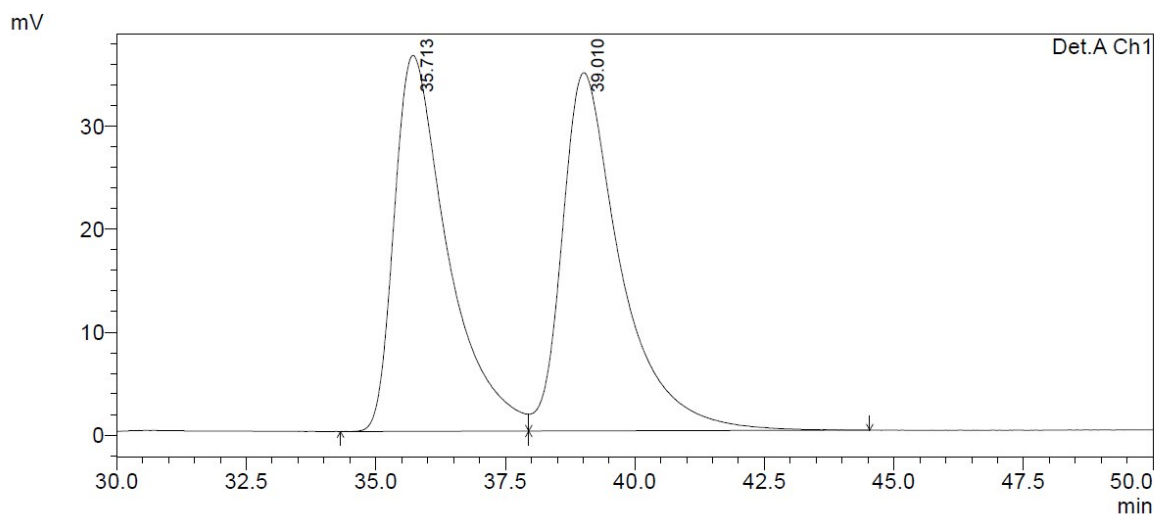

Detector A Ch1 254nm

| Peak# | Ret. Time | Area    | Height | Area %  | Height % |
|-------|-----------|---------|--------|---------|----------|
| 1     | 35.713    | 2618551 | 36514  | 48.960  | 51.210   |
| 2     | 39.010    | 2729757 | 34789  | 51.040  | 48.790   |
| Total |           | 5348309 | 71303  | 100.000 | 100.000  |

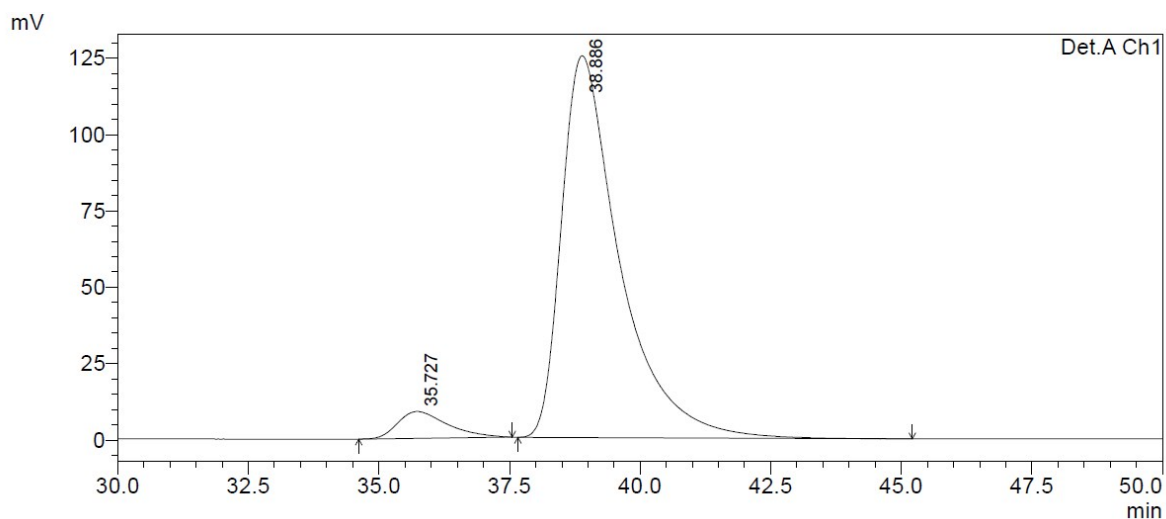

PeakTable

Detector A Ch1 254nm

| Peak# | Ret. Time | Area     | Height | Area %  | Height % |
|-------|-----------|----------|--------|---------|----------|
| 1     | 35.727    | 580571   | 8778   | 5.667   | 6.565    |
| 2     | 38.886    | 9664035  | 124928 | 94.333  | 93.435   |
| Total |           | 10244607 | 133706 | 100.000 | 100.000  |

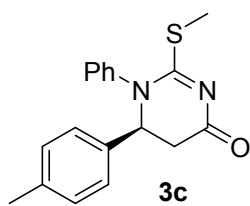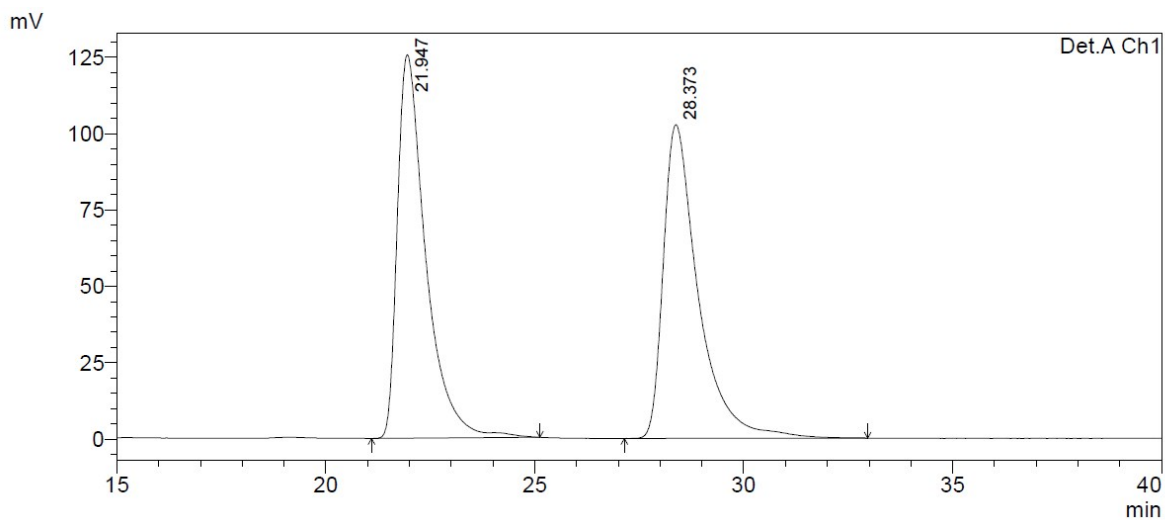

Detector A Ch1 254nm

| Peak# | Ret. Time | Area     | Height | Area %  | Height % |
|-------|-----------|----------|--------|---------|----------|
| 1     | 21.947    | 5928782  | 125502 | 49.845  | 55.009   |
| 2     | 28.373    | 5965756  | 102645 | 50.155  | 44.991   |
| Total |           | 11894539 | 228147 | 100.000 | 100.000  |

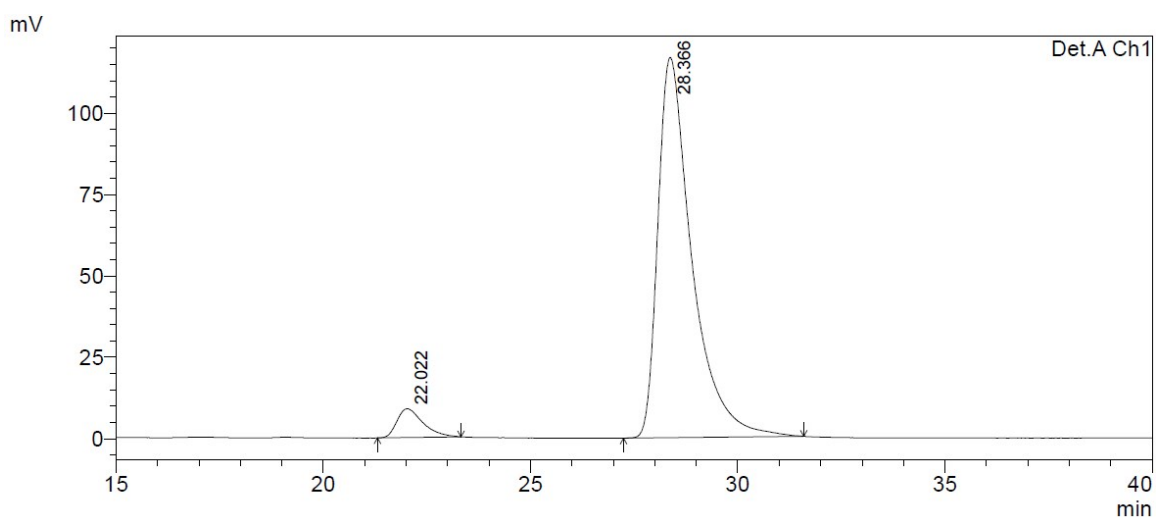

Detector A Ch1 254nm

| Peak# | Ret. Time | Area    | Height | Area %  | Height % |
|-------|-----------|---------|--------|---------|----------|
| 1     | 22.022    | 385661  | 8827   | 5.477   | 7.025    |
| 2     | 28.366    | 6655879 | 116829 | 94.523  | 92.975   |
| Total |           | 7041540 | 125656 | 100.000 | 100.000  |

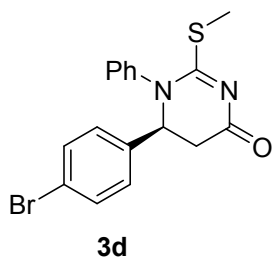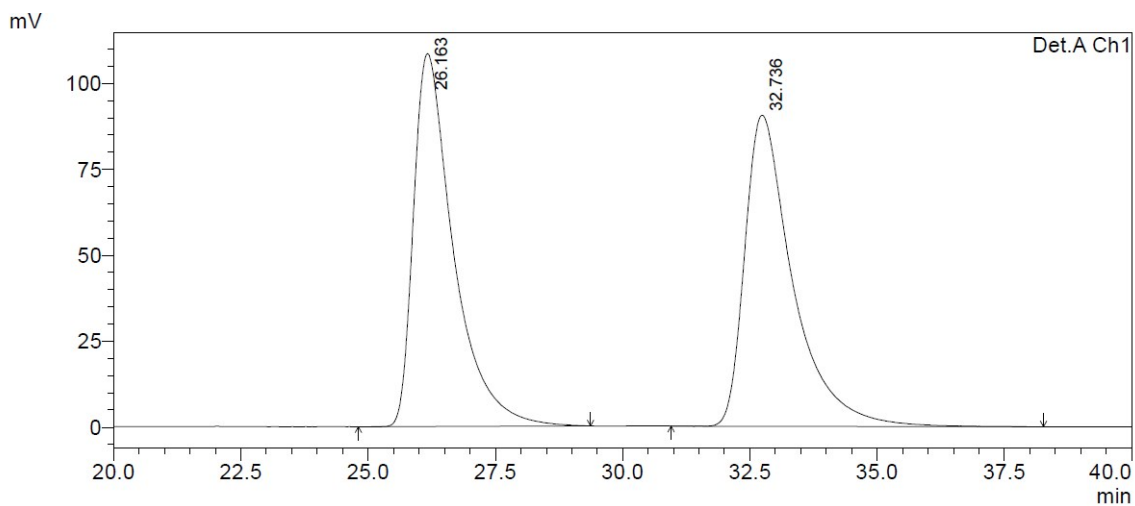

Detector A Ch1 254nm

| Peak# | Ret. Time | Area     | Height | Area %  | Height % |
|-------|-----------|----------|--------|---------|----------|
| 1     | 26.163    | 5920708  | 108396 | 49.959  | 54.511   |
| 2     | 32.736    | 5930393  | 90456  | 50.041  | 45.489   |
| Total |           | 11851101 | 198853 | 100.000 | 100.000  |

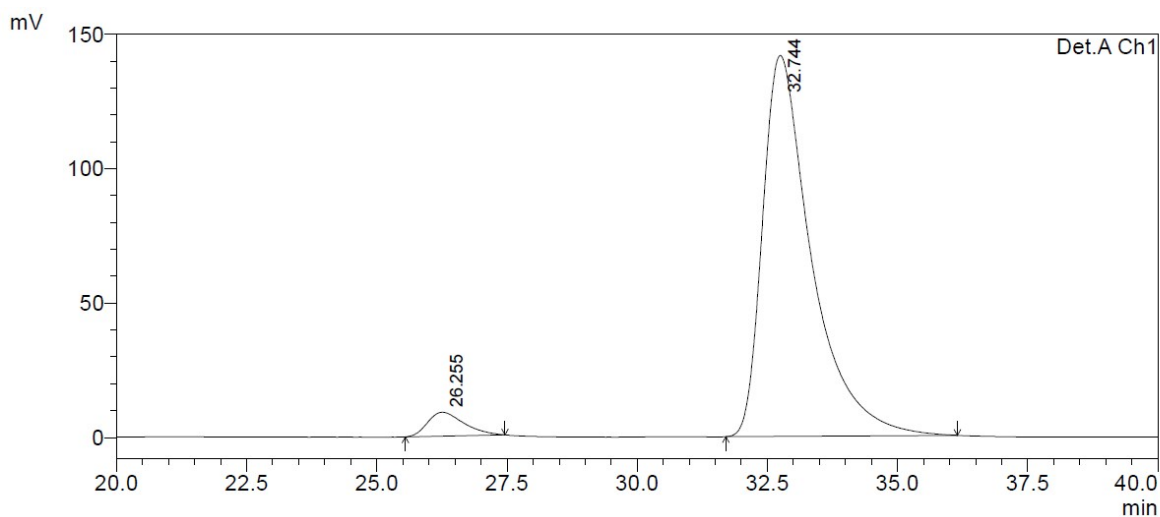

Detector A Ch1 254nm

| Peak# | Ret. Time | Area    | Height | Area %  | Height % |
|-------|-----------|---------|--------|---------|----------|
| 1     | 26.255    | 429988  | 8904   | 4.438   | 5.910    |
| 2     | 32.744    | 9258346 | 141752 | 95.562  | 94.090   |
| Total |           | 9688334 | 150657 | 100.000 | 100.000  |

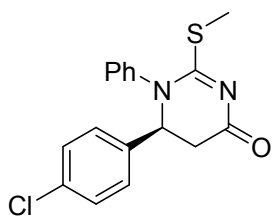

**3e**

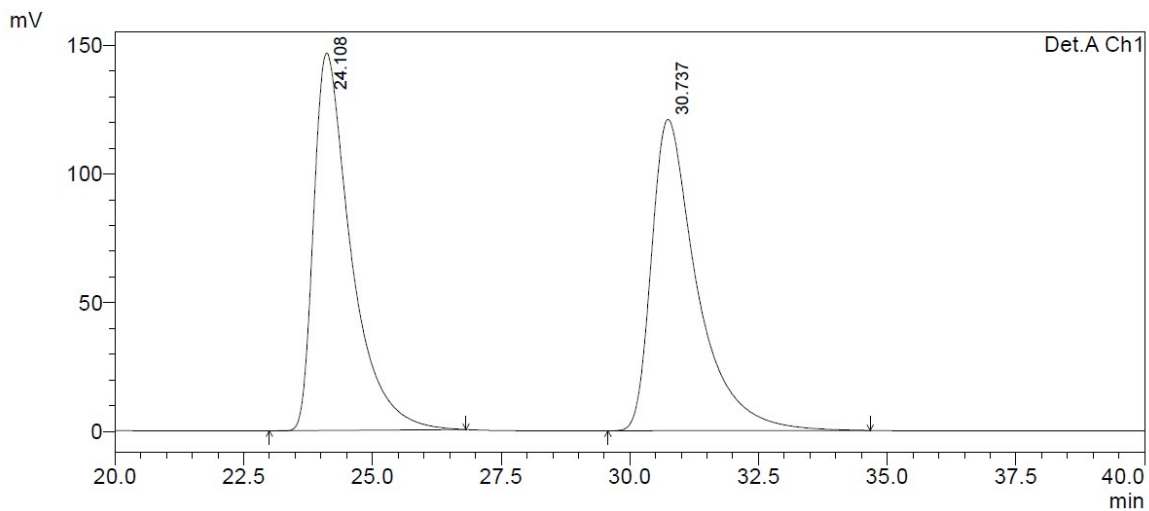

Detector A Ch1 254nm

| Peak# | Ret. Time | Area     | Height | Area %  | Height % |
|-------|-----------|----------|--------|---------|----------|
| 1     | 24.108    | 7377864  | 146590 | 49.774  | 54.801   |
| 2     | 30.737    | 7444993  | 120903 | 50.226  | 45.199   |
| Total |           | 14822858 | 267493 | 100.000 | 100.000  |

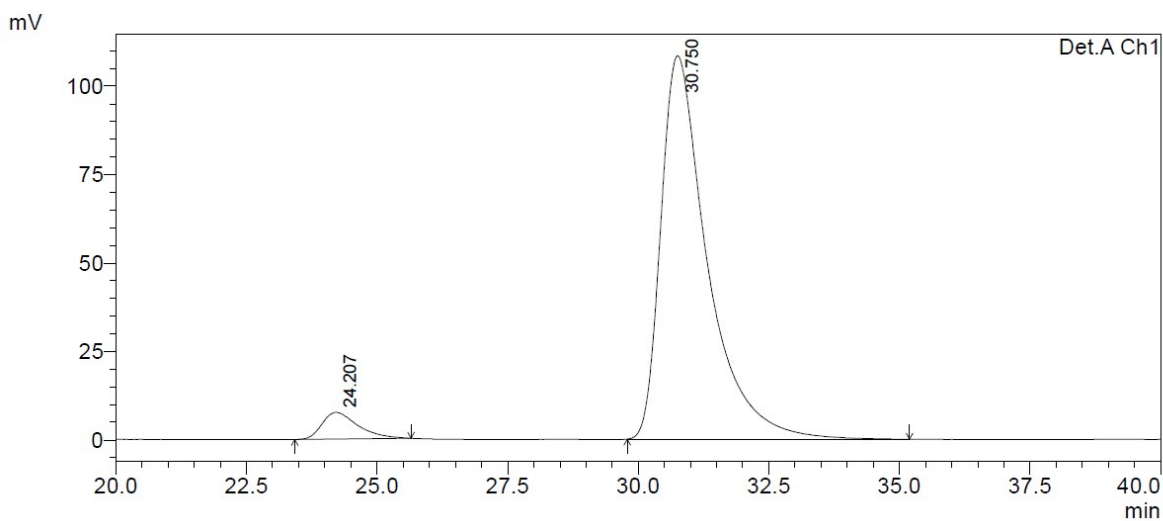

Detector A Ch1 254nm

| Peak# | Ret. Time | Area    | Height | Area %  | Height % |
|-------|-----------|---------|--------|---------|----------|
| 1     | 24.207    | 358984  | 7510   | 5.094   | 6.481    |
| 2     | 30.750    | 6688085 | 108363 | 94.906  | 93.519   |
| Total |           | 7047068 | 115873 | 100.000 | 100.000  |

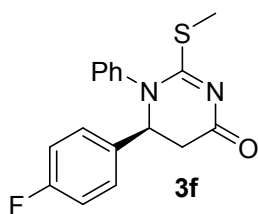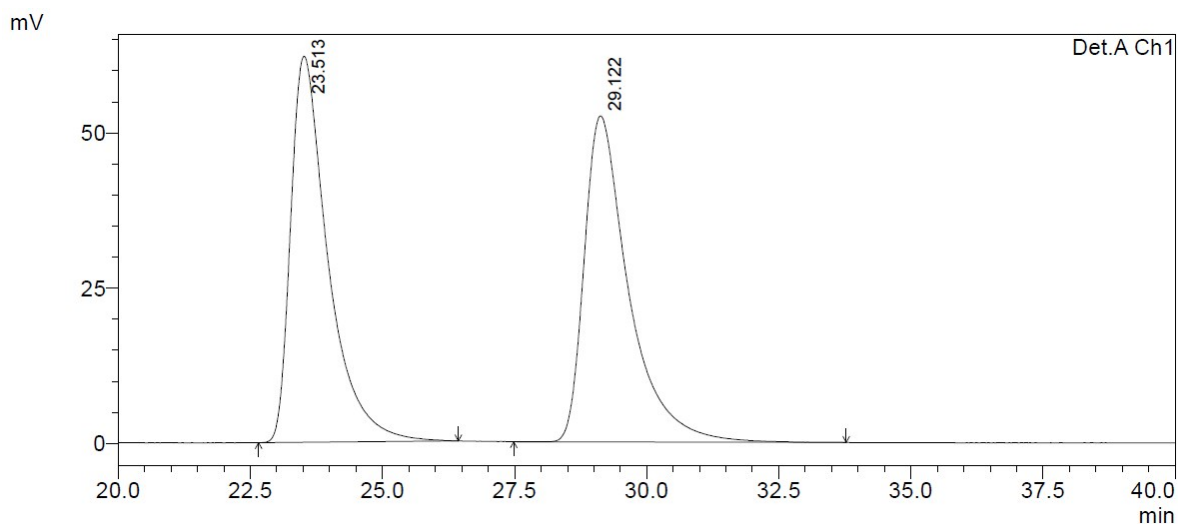

Detector A Ch1 254nm

| Peak# | Ret. Time | Area    | Height | Area %  | Height % |
|-------|-----------|---------|--------|---------|----------|
| 1     | 23.513    | 3057126 | 62214  | 49.897  | 54.224   |
| 2     | 29.122    | 3069786 | 52520  | 50.103  | 45.776   |
| Total |           | 6126911 | 114734 | 100.000 | 100.000  |

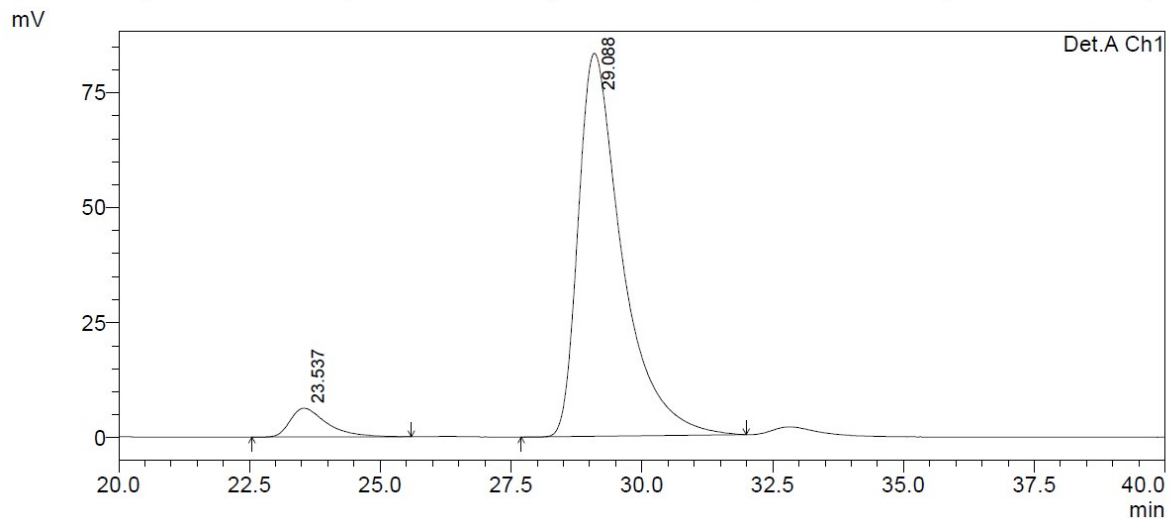

Detector A Ch1 254nm

| Peak# | Ret. Time | Area    | Height | Area %  | Height % |
|-------|-----------|---------|--------|---------|----------|
| 1     | 23.537    | 304563  | 6244   | 5.909   | 6.970    |
| 2     | 29.088    | 4850051 | 83343  | 94.091  | 93.030   |
| Total |           | 5154615 | 89587  | 100.000 | 100.000  |

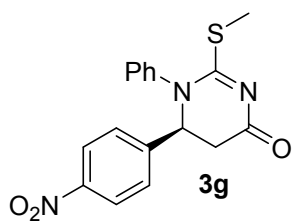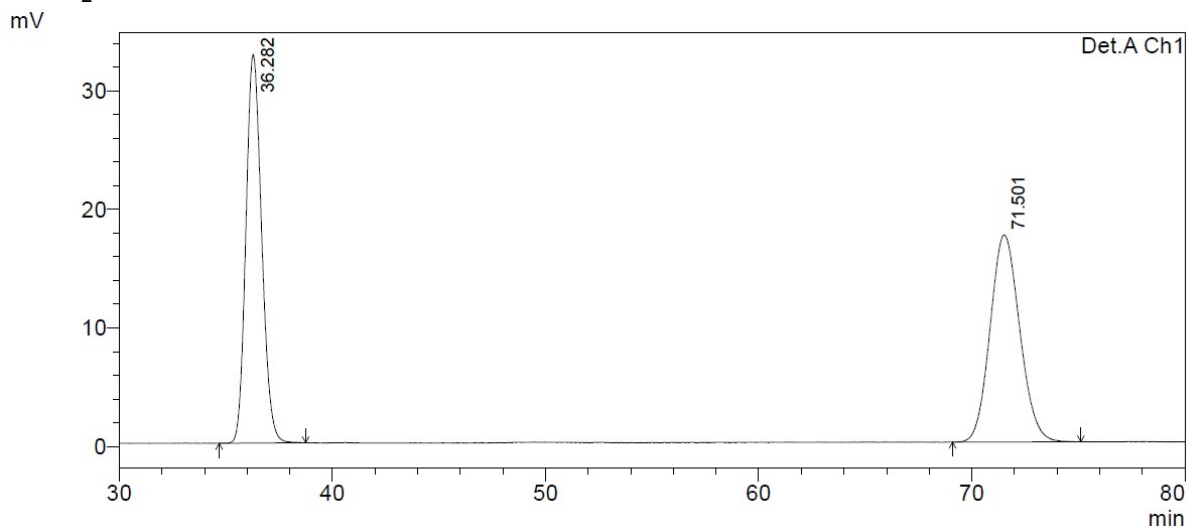

Detector A Ch1 254nm

| Peak# | Ret. Time | Area    | Height | Area %  | Height % |
|-------|-----------|---------|--------|---------|----------|
| 1     | 36.282    | 1680655 | 32746  | 49.891  | 65.221   |
| 2     | 71.501    | 1687983 | 17461  | 50.109  | 34.779   |
| Total |           | 3368638 | 50207  | 100.000 | 100.000  |

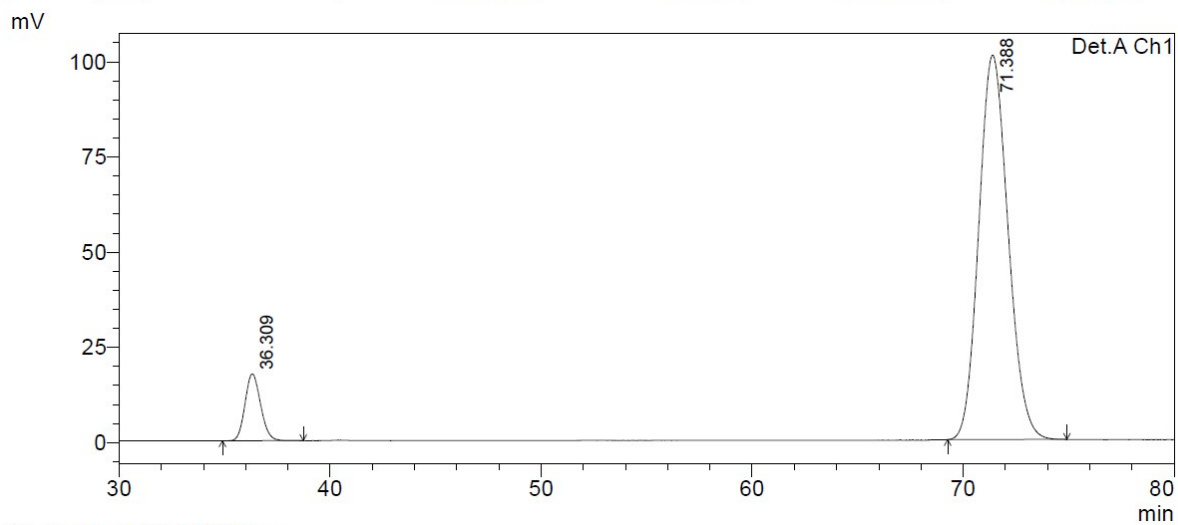

Detector A Ch1 254nm

| Peak# | Ret. Time | Area     | Height | Area %  | Height % |
|-------|-----------|----------|--------|---------|----------|
| 1     | 36.309    | 900971   | 17569  | 8.458   | 14.819   |
| 2     | 71.388    | 9751244  | 100995 | 91.542  | 85.181   |
| Total |           | 10652214 | 118564 | 100.000 | 100.000  |

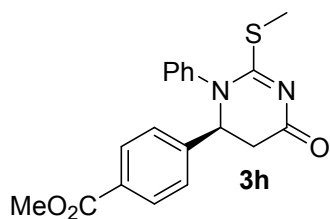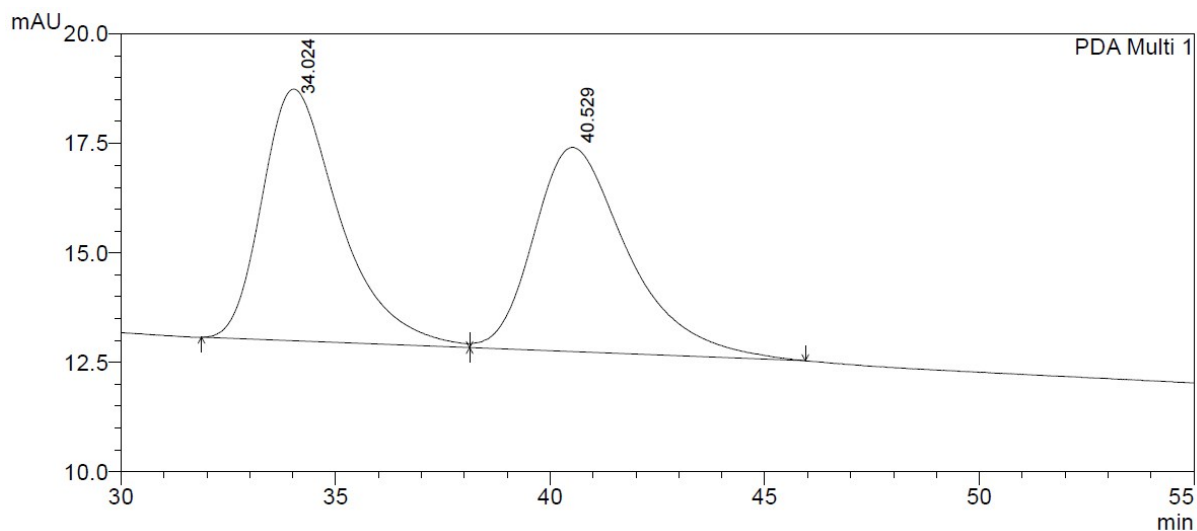

PDA Ch1 254nm 4nm

| Peak# | Ret. Time | Area    | Height | Area %  | Height % |
|-------|-----------|---------|--------|---------|----------|
| 1     | 34.024    | 723368  | 5750   | 50.302  | 55.201   |
| 2     | 40.529    | 714684  | 4667   | 49.698  | 44.799   |
| Total |           | 1438052 | 10417  | 100.000 | 100.000  |

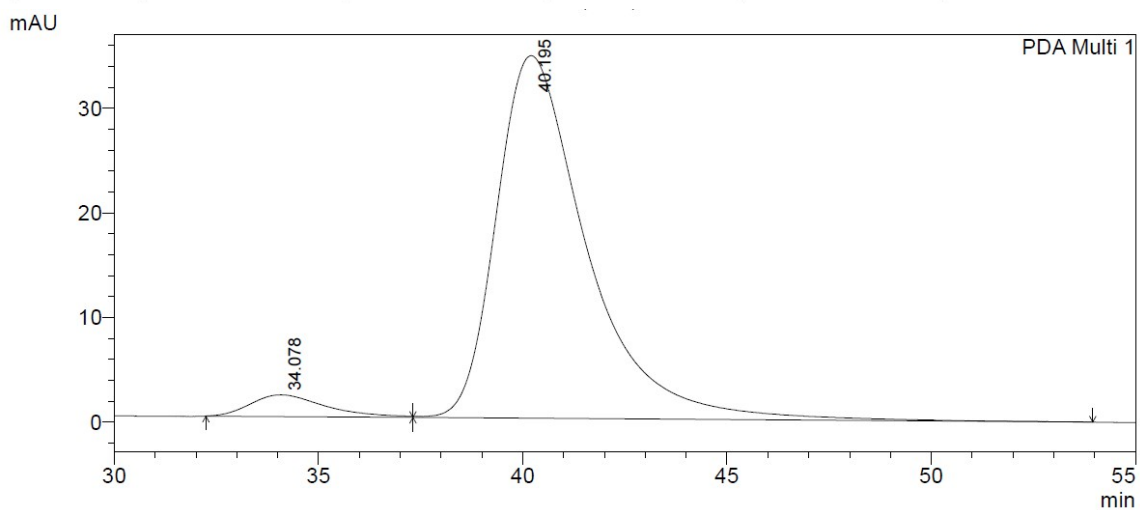

PDA Ch1 254nm 4nm

| Peak# | Ret. Time | Area    | Height | Area %  | Height % |
|-------|-----------|---------|--------|---------|----------|
| 1     | 34.078    | 264525  | 2082   | 4.700   | 5.669    |
| 2     | 40.195    | 5363811 | 34636  | 95.300  | 94.331   |
| Total |           | 5628336 | 36718  | 100.000 | 100.000  |

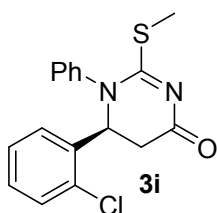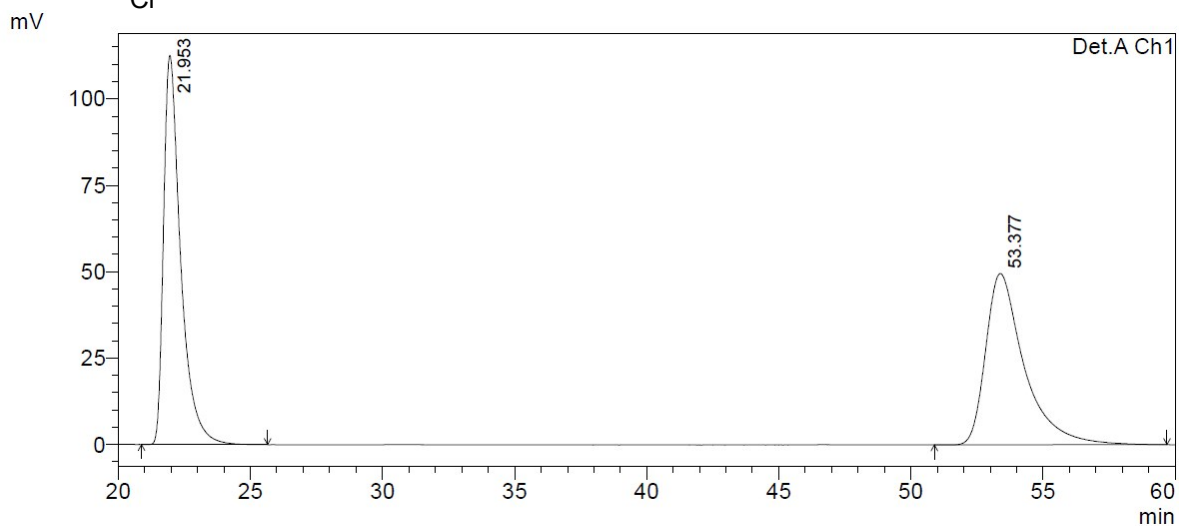

Detector A Ch1 254nm

| Peak# | Ret. Time | Area     | Height | Area %  | Height % |
|-------|-----------|----------|--------|---------|----------|
| 1     | 21.953    | 5061775  | 112574 | 50.168  | 69.435   |
| 2     | 53.377    | 5027787  | 49555  | 49.832  | 30.565   |
| Total |           | 10089561 | 162129 | 100.000 | 100.000  |

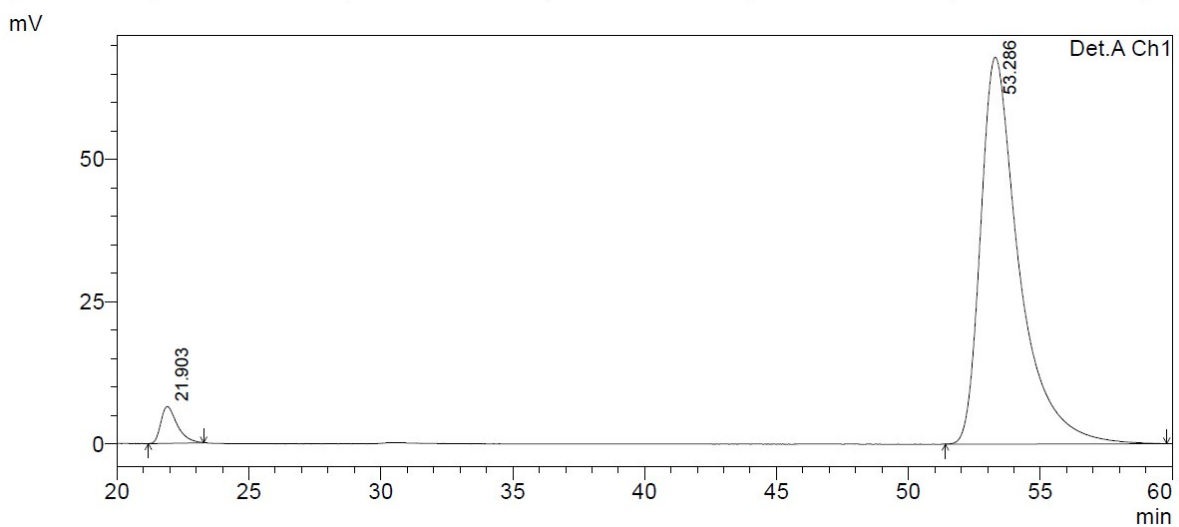

Detector A Ch1 254nm

| Peak# | Ret. Time | Area    | Height | Area %  | Height % |
|-------|-----------|---------|--------|---------|----------|
| 1     | 21.903    | 278250  | 6464   | 3.874   | 8.682    |
| 2     | 53.286    | 6903536 | 67984  | 96.126  | 91.318   |
| Total |           | 7181786 | 74448  | 100.000 | 100.000  |



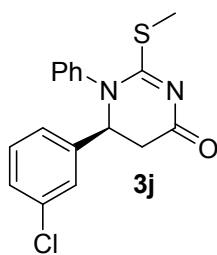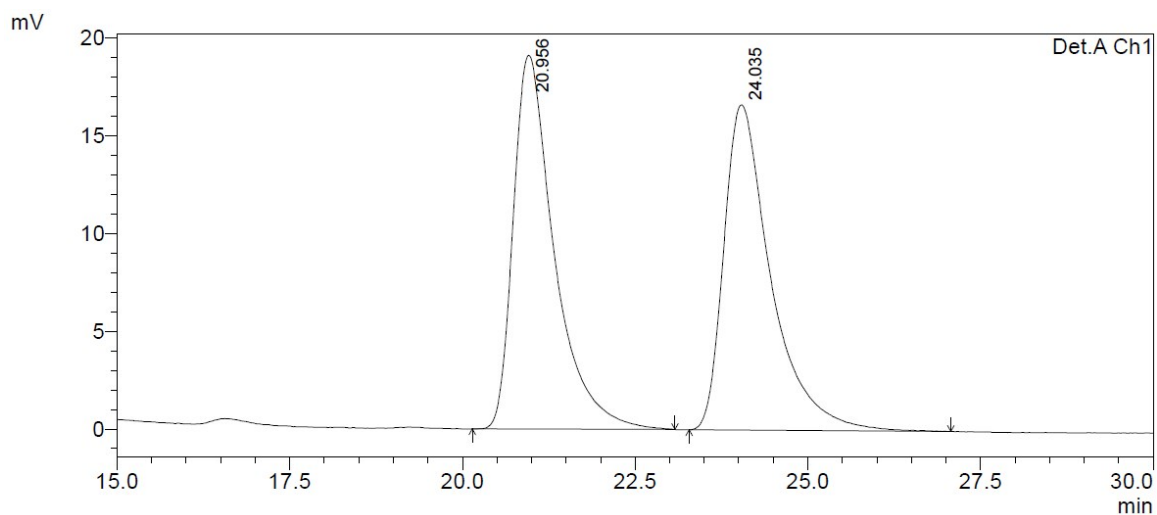

Detector A Ch1 254nm

| Peak# | Ret. Time | Area    | Height | Area %  | Height % |
|-------|-----------|---------|--------|---------|----------|
| 1     | 20.956    | 788033  | 19113  | 49.999  | 53.472   |
| 2     | 24.035    | 788055  | 16631  | 50.001  | 46.528   |
| Total |           | 1576088 | 35744  | 100.000 | 100.000  |

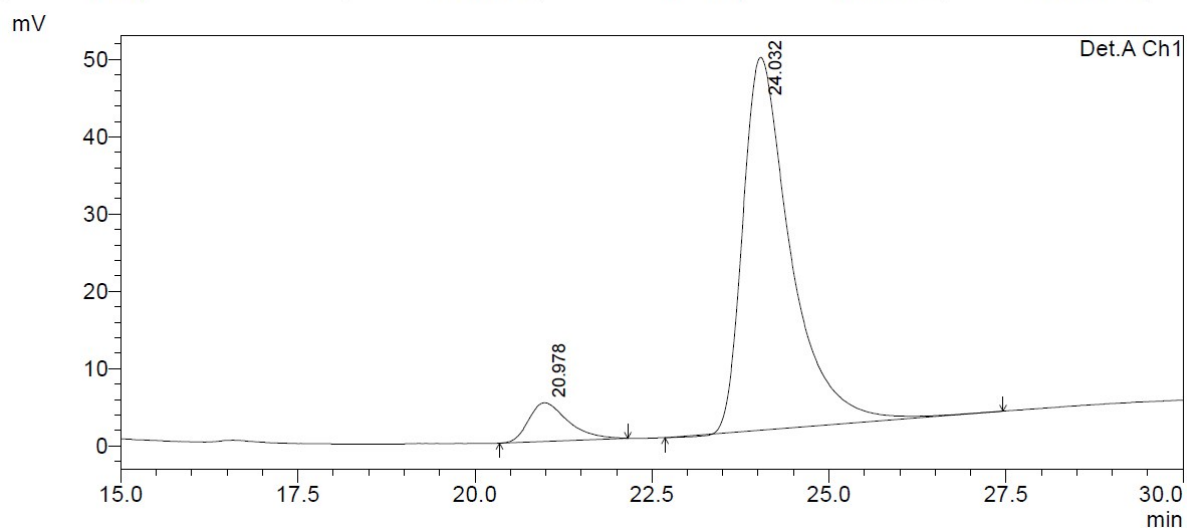

Detector A Ch1 254nm

| Peak# | Ret. Time | Area    | Height | Area %  | Height % |
|-------|-----------|---------|--------|---------|----------|
| 1     | 20.978    | 193573  | 5009   | 7.870   | 9.405    |
| 2     | 24.032    | 2266081 | 48253  | 92.130  | 90.595   |
| Total |           | 2459654 | 53262  | 100.000 | 100.000  |

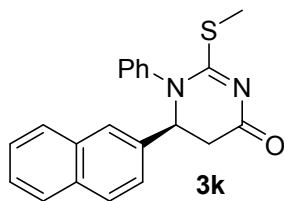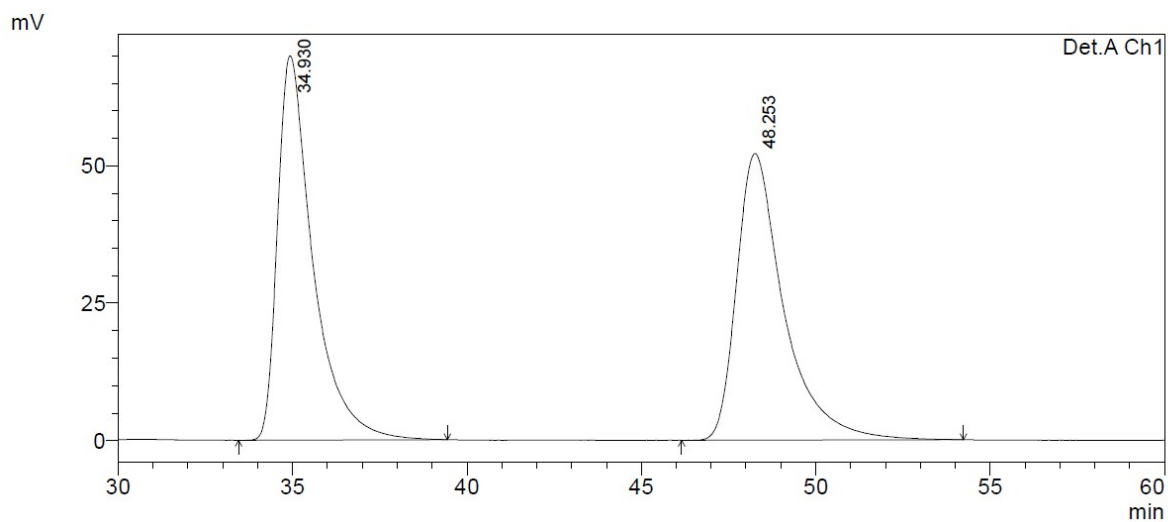

Detector A Ch1 254nm

| Peak# | Ret. Time | Area    | Height | Area %  | Height % |
|-------|-----------|---------|--------|---------|----------|
| 1     | 34.930    | 4928341 | 69950  | 50.133  | 57.278   |
| 2     | 48.253    | 4902233 | 52173  | 49.867  | 42.722   |
| Total |           | 9830574 | 122123 | 100.000 | 100.000  |

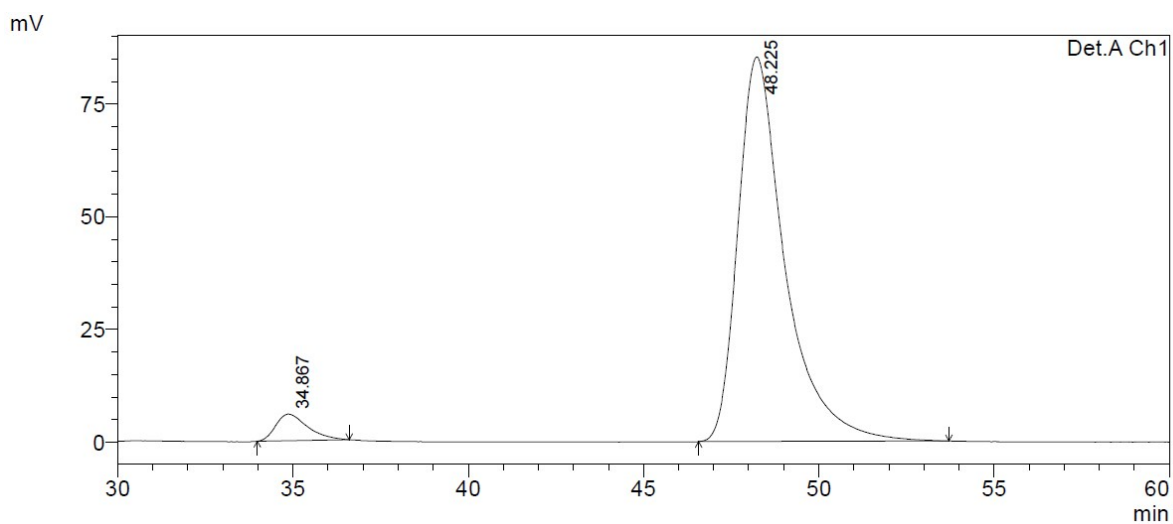

Detector A Ch1 254nm

| Peak# | Ret. Time | Area    | Height | Area %  | Height % |
|-------|-----------|---------|--------|---------|----------|
| 1     | 34.867    | 372373  | 5897   | 4.469   | 6.469    |
| 2     | 48.225    | 7960744 | 85259  | 95.531  | 93.531   |
| Total |           | 8333117 | 91157  | 100.000 | 100.000  |

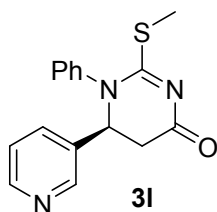

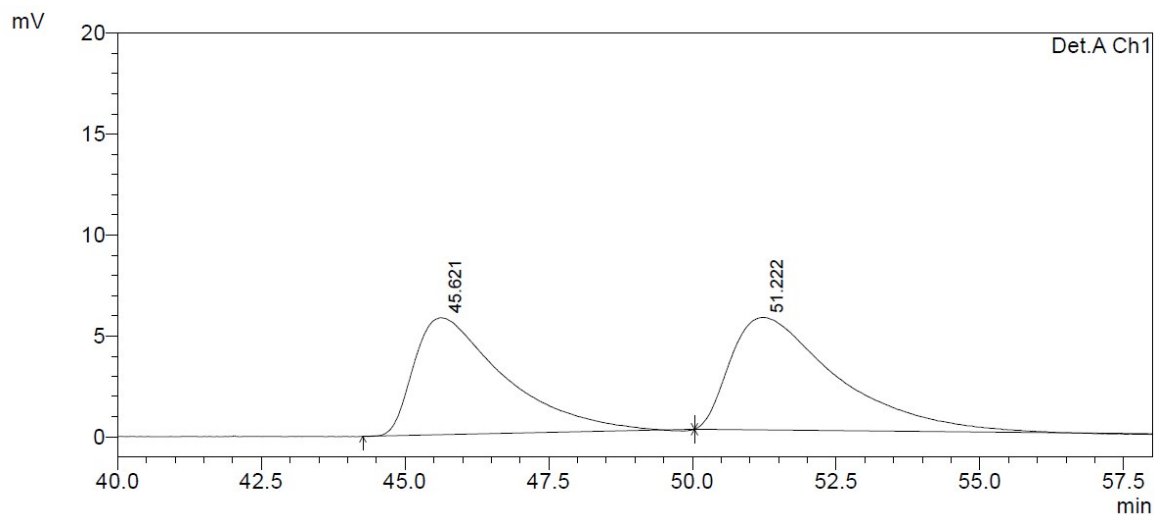

Detector A Ch1 254nm

| Peak# | Ret. Time | Area    | Height | Area %  | Height % |
|-------|-----------|---------|--------|---------|----------|
| 1     | 45.621    | 628758  | 5792   | 46.739  | 50.983   |
| 2     | 51.222    | 716495  | 5569   | 53.261  | 49.017   |
| Total |           | 1345253 | 11360  | 100.000 | 100.000  |

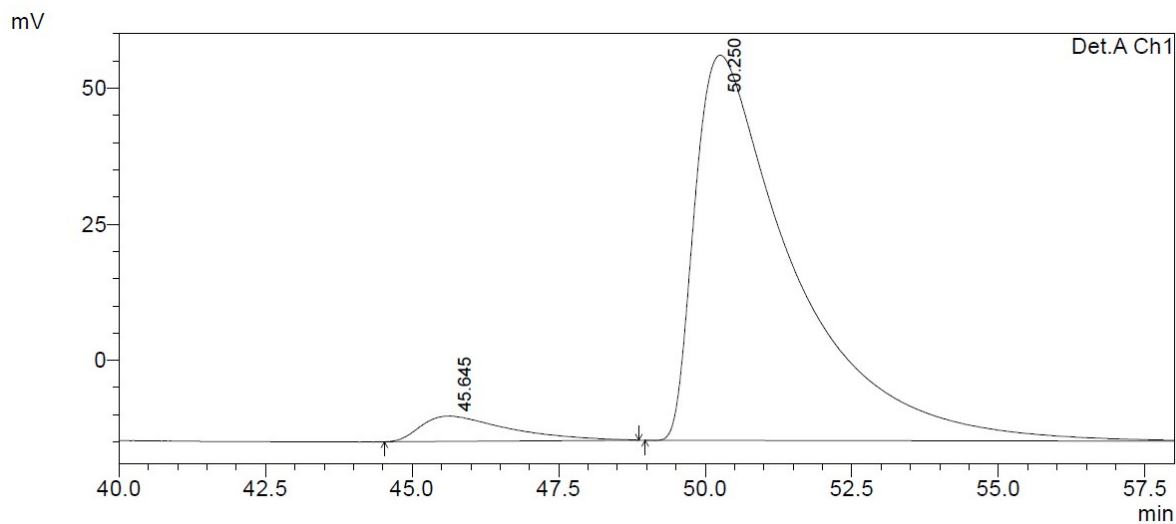

Detector A Ch1 254nm

| Peak# | Ret. Time | Area    | Height | Area %  | Height % |
|-------|-----------|---------|--------|---------|----------|
| 1     | 45.645    | 478821  | 4635   | 5.423   | 6.143    |
| 2     | 50.250    | 8350995 | 70824  | 94.577  | 93.857   |
| Total |           | 8829816 | 75459  | 100.000 | 100.000  |

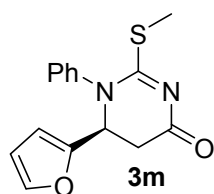

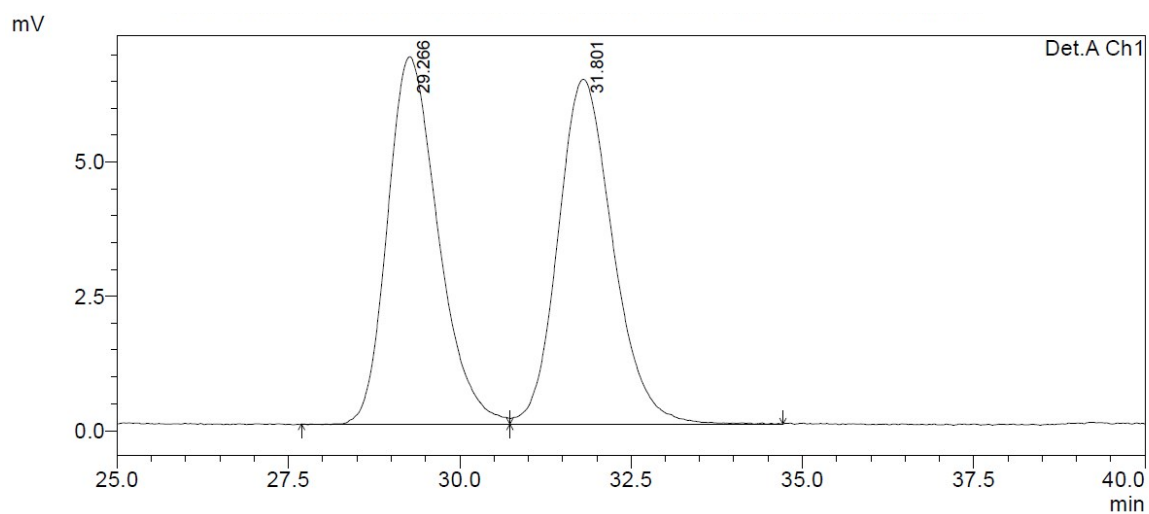

| Peak# | Ret. Time | Area   | Height | Area %  | Height % |
|-------|-----------|--------|--------|---------|----------|
| 1     | 29.266    | 350964 | 6837   | 49.585  | 51.587   |
| 2     | 31.801    | 356842 | 6417   | 50.415  | 48.413   |
| Total |           | 707806 | 13254  | 100.000 | 100.000  |

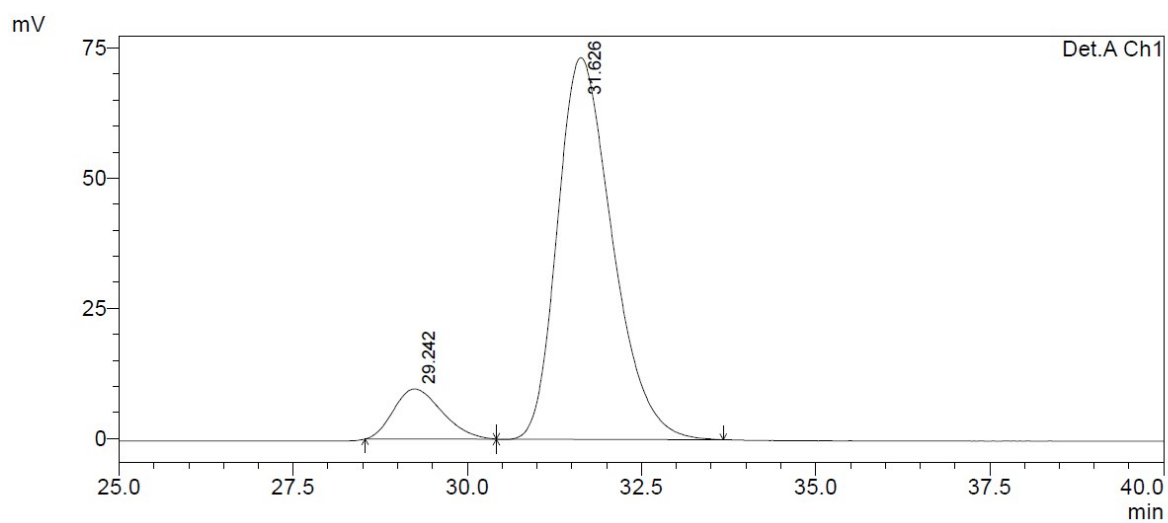

Detector A Ch1 254nm

| Peak# | Ret. Time | Area    | Height | Area %  | Height % |
|-------|-----------|---------|--------|---------|----------|
| 1     | 29.242    | 465870  | 9619   | 10.391  | 11.591   |
| 2     | 31.626    | 4017380 | 73366  | 89.609  | 88.409   |
| Total |           | 4483250 | 82984  | 100.000 | 100.000  |

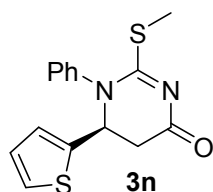

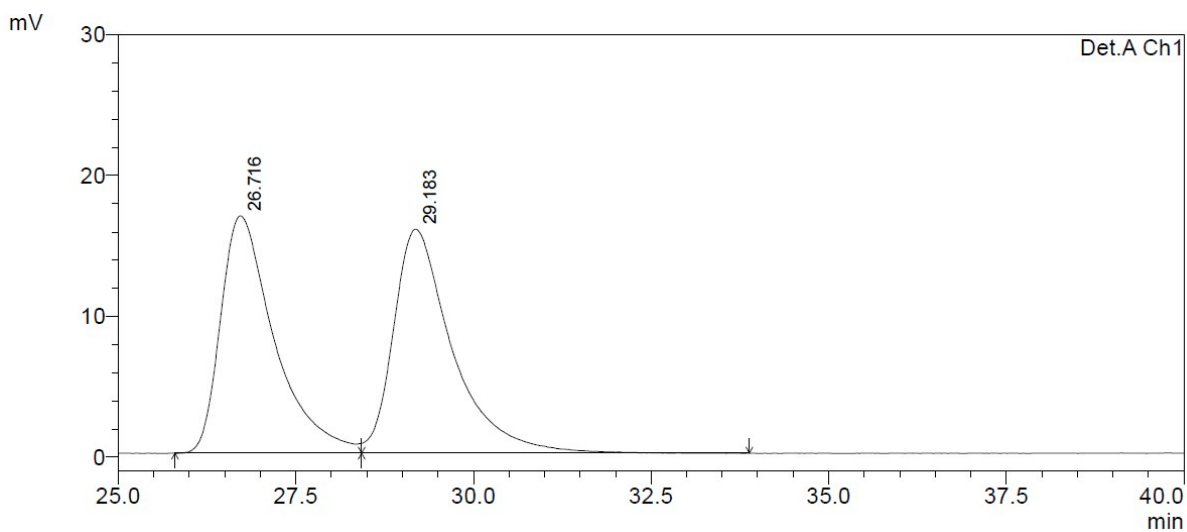

Detector A Ch1 254nm

| Peak# | Ret. Time | Area    | Height | Area %  | Height % |
|-------|-----------|---------|--------|---------|----------|
| 1     | 26.716    | 888331  | 16866  | 49.138  | 51.451   |
| 2     | 29.183    | 919480  | 15914  | 50.862  | 48.549   |
| Total |           | 1807811 | 32781  | 100.000 | 100.000  |

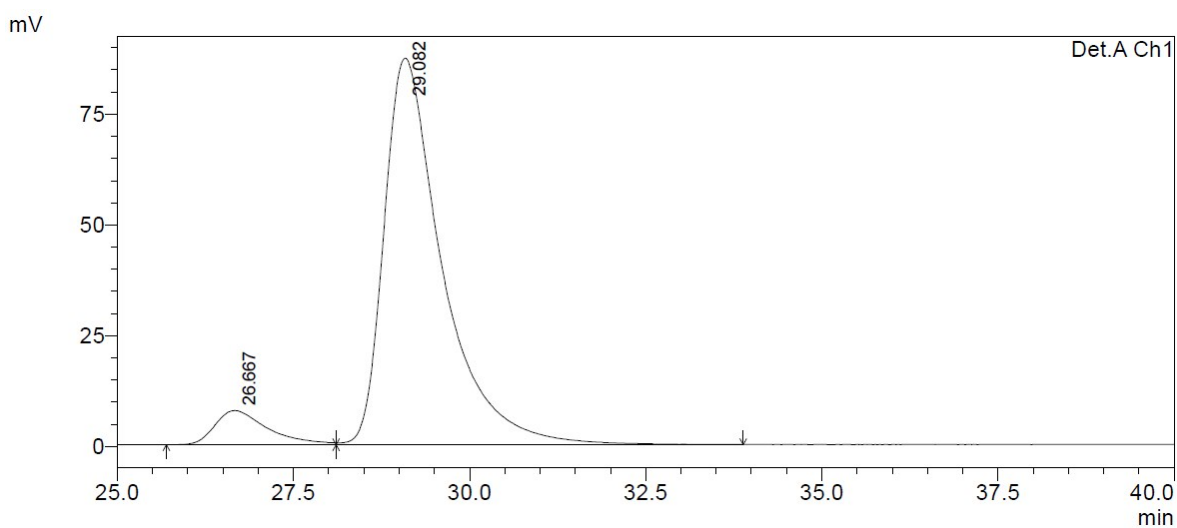

Detector A Ch1 254nm

| Peak# | Ret. Time | Area    | Height | Area %  | Height % |
|-------|-----------|---------|--------|---------|----------|
| 1     | 26.667    | 398314  | 7692   | 7.374   | 8.102    |
| 2     | 29.082    | 5003019 | 87246  | 92.626  | 91.898   |
| Total |           | 5401333 | 94938  | 100.000 | 100.000  |

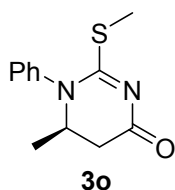

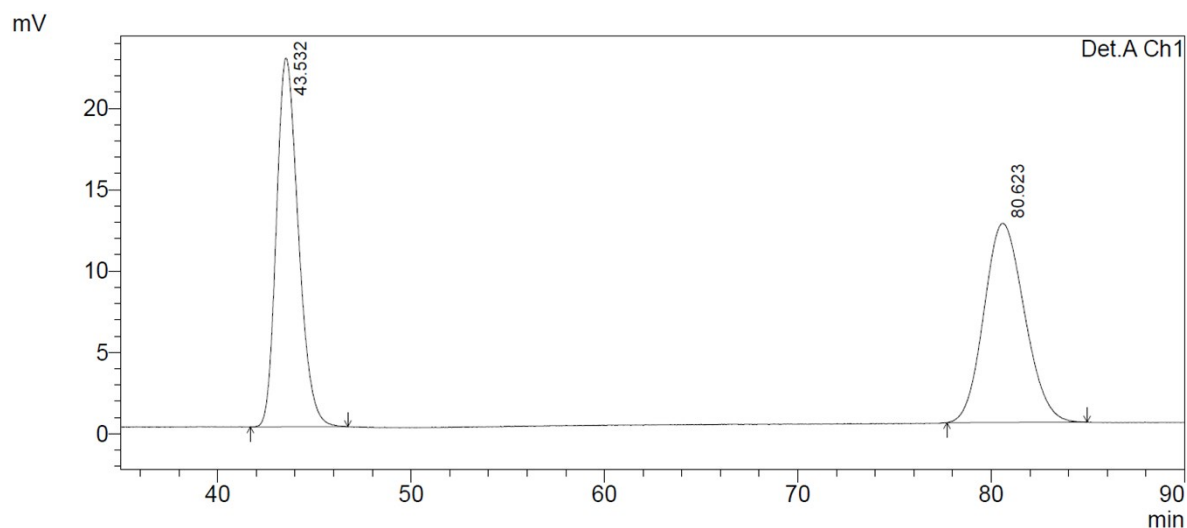

Detector A Ch1 254nm

| Peak# | Ret. Time | Area    | Height | Area %  | Height % |
|-------|-----------|---------|--------|---------|----------|
| 1     | 43.532    | 1789689 | 22668  | 50.056  | 64.936   |
| 2     | 80.623    | 1785709 | 12240  | 49.944  | 35.064   |
| Total |           | 3575398 | 34908  | 100.000 | 100.000  |

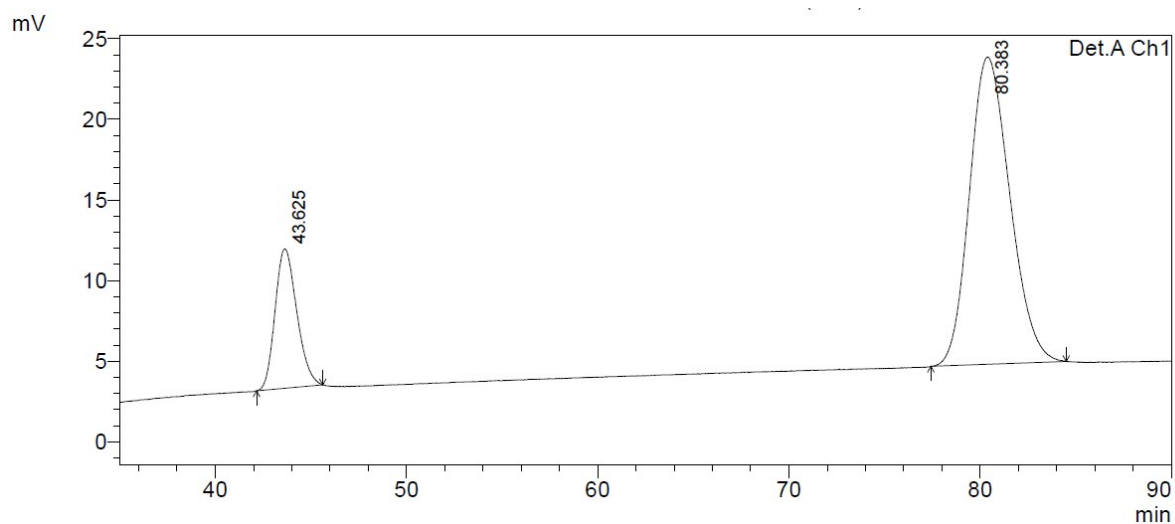

Detector A Ch1 254nm

| Peak# | Ret. Time | Area    | Height | Area %  | Height % |
|-------|-----------|---------|--------|---------|----------|
| 1     | 43.625    | 682469  | 8634   | 19.599  | 31.188   |
| 2     | 80.383    | 2799772 | 19050  | 80.401  | 68.812   |
| Total |           | 3482240 | 27684  | 100.000 | 100.000  |

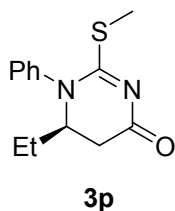

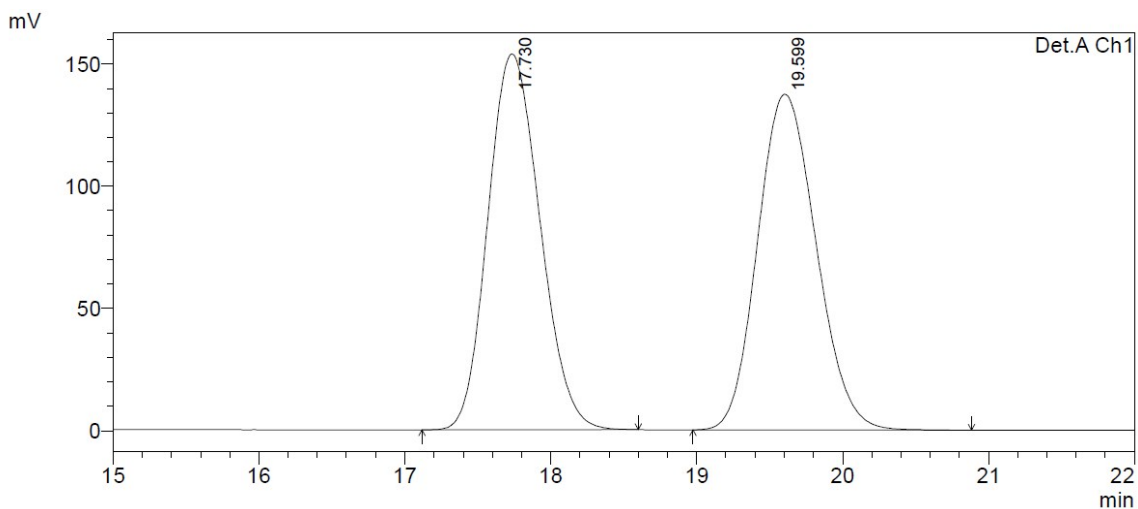

Detector A Ch1 254nm

| Peak# | Ret. Time | Area    | Height | Area %  | Height % |
|-------|-----------|---------|--------|---------|----------|
| 1     | 17.730    | 3815433 | 153739 | 49.928  | 52.823   |
| 2     | 19.599    | 3826394 | 137309 | 50.072  | 47.177   |
| Total |           | 7641827 | 291048 | 100.000 | 100.000  |

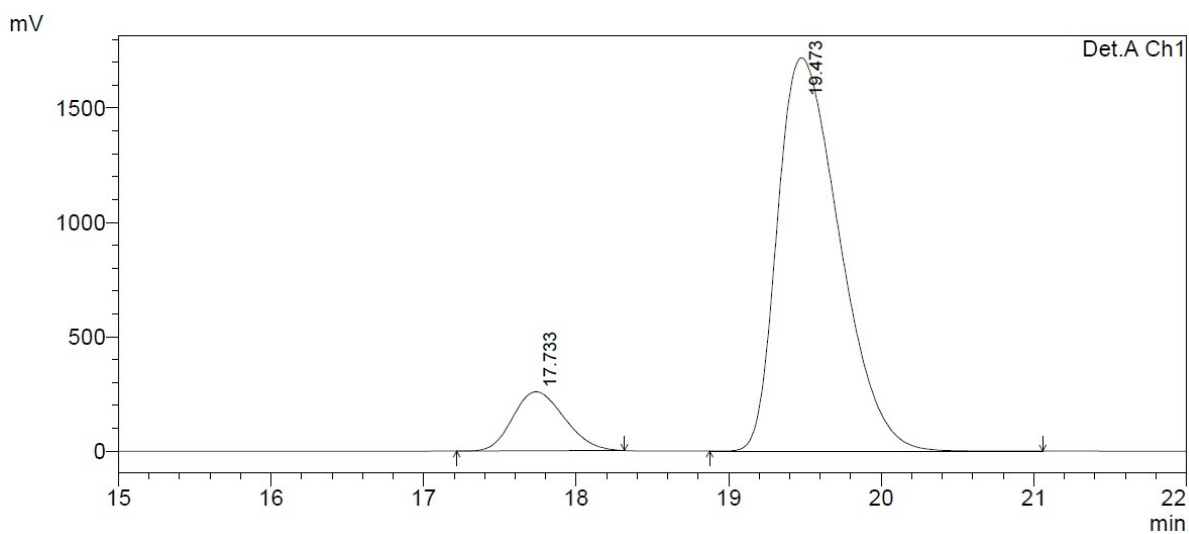

Detector A Ch1 254nm

| Peak# | Ret. Time | Area     | Height  | Area %  | Height % |
|-------|-----------|----------|---------|---------|----------|
| 1     | 17.733    | 6072327  | 258179  | 11.112  | 13.060   |
| 2     | 19.473    | 48572983 | 1718736 | 88.888  | 86.940   |
| Total |           | 54645310 | 1976915 | 100.000 | 100.000  |

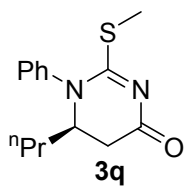

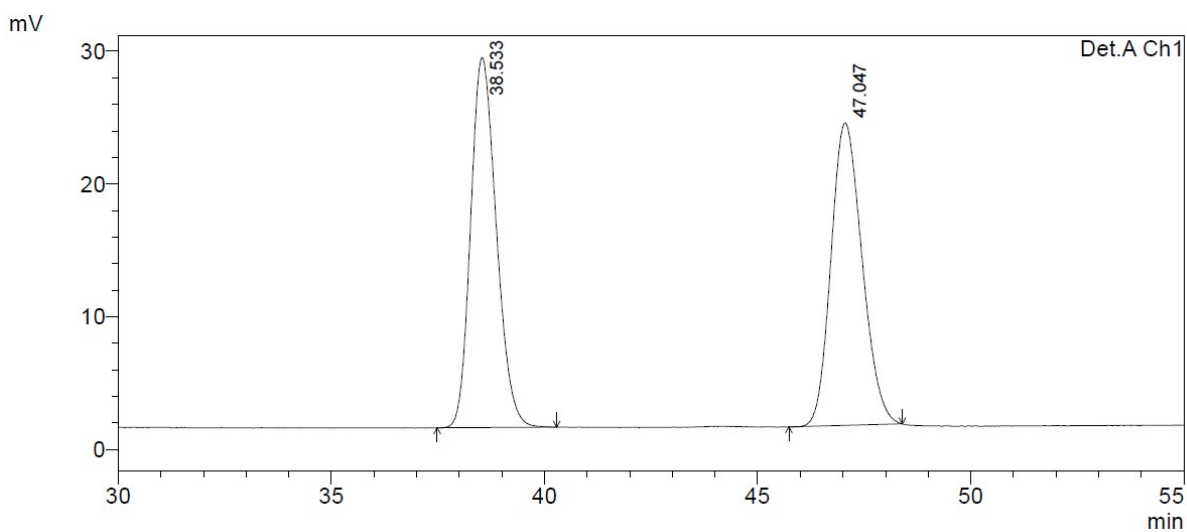

Detector A Ch1 254nm

| Peak# | Ret. Time | Area    | Height | Area %  | Height % |
|-------|-----------|---------|--------|---------|----------|
| 1     | 38.533    | 1167540 | 27874  | 50.228  | 55.005   |
| 2     | 47.047    | 1156918 | 22801  | 49.772  | 44.995   |
| Total |           | 2324457 | 50675  | 100.000 | 100.000  |

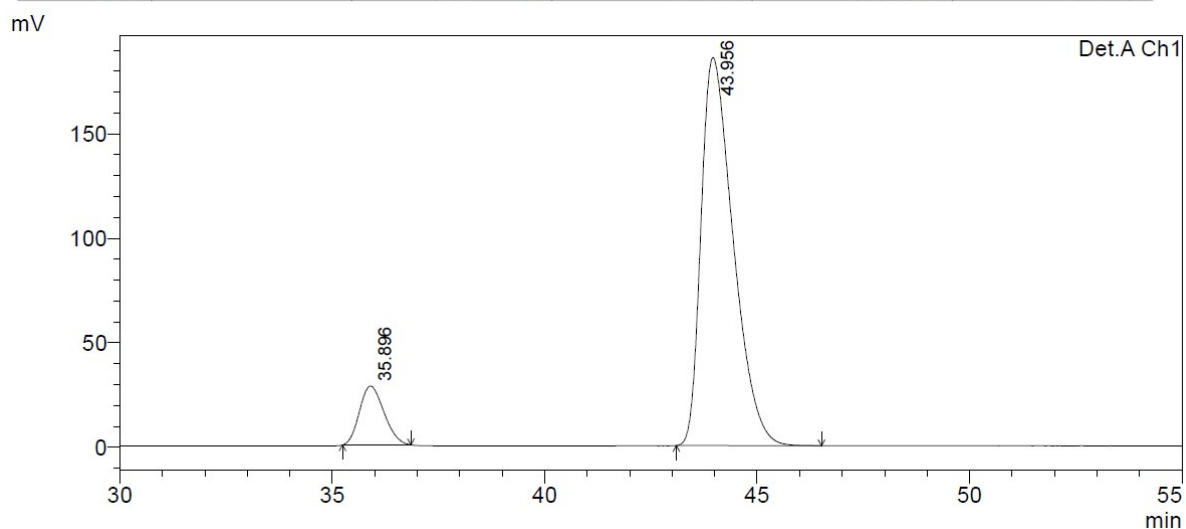

Detector A Ch1 254nm

| Peak# | Ret. Time | Area     | Height | Area %  | Height % |
|-------|-----------|----------|--------|---------|----------|
| 1     | 35.896    | 1129258  | 28174  | 10.362  | 13.174   |
| 2     | 43.956    | 9768326  | 185682 | 89.638  | 86.826   |
| Total |           | 10897584 | 213856 | 100.000 | 100.000  |

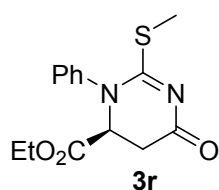



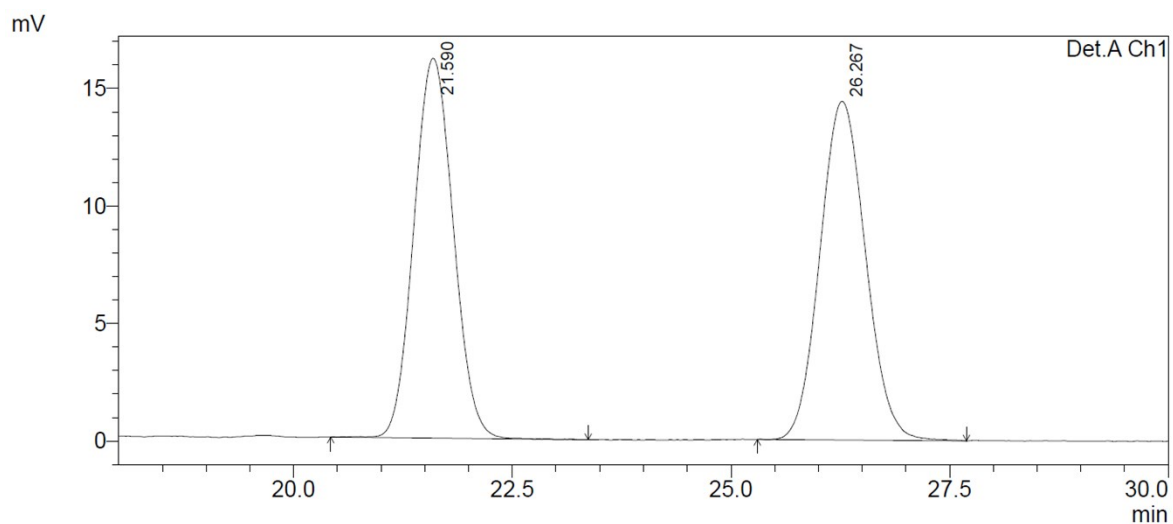

Detector A Ch1 254nm

| Peak# | Ret. Time | Area    | Height | Area %  | Height % |
|-------|-----------|---------|--------|---------|----------|
| 1     | 21.590    | 506359  | 16166  | 49.200  | 52.860   |
| 2     | 26.267    | 522820  | 14417  | 50.800  | 47.140   |
| Total |           | 1029179 | 30583  | 100.000 | 100.000  |

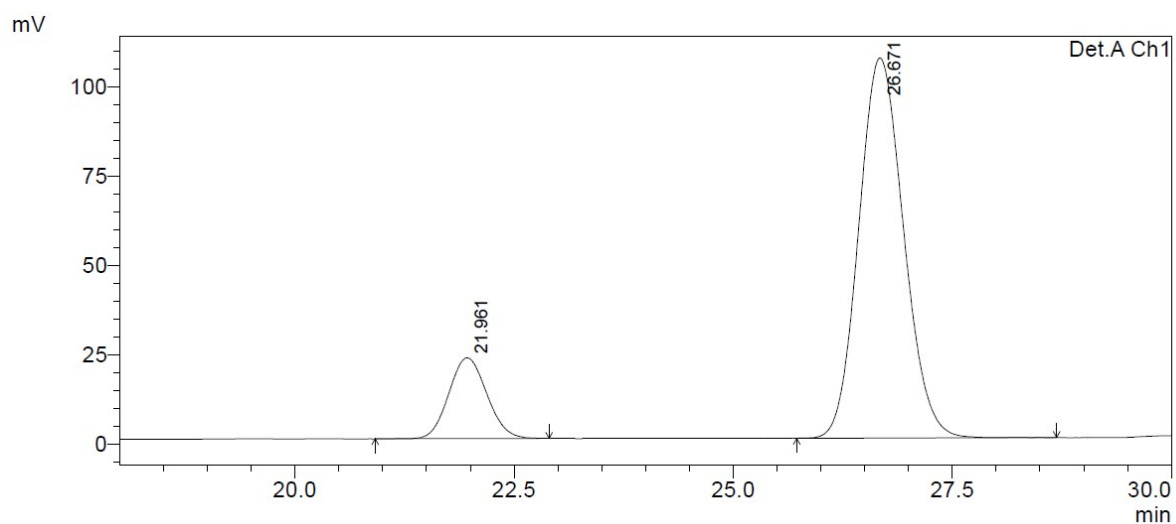

Detector A Ch1 254nm

| Peak# | Ret. Time | Area    | Height | Area %  | Height % |
|-------|-----------|---------|--------|---------|----------|
| 1     | 21.961    | 682609  | 22608  | 15.291  | 17.525   |
| 2     | 26.671    | 3781512 | 106391 | 84.709  | 82.475   |
| Total |           | 4464121 | 128999 | 100.000 | 100.000  |

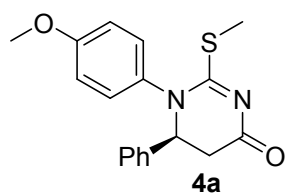

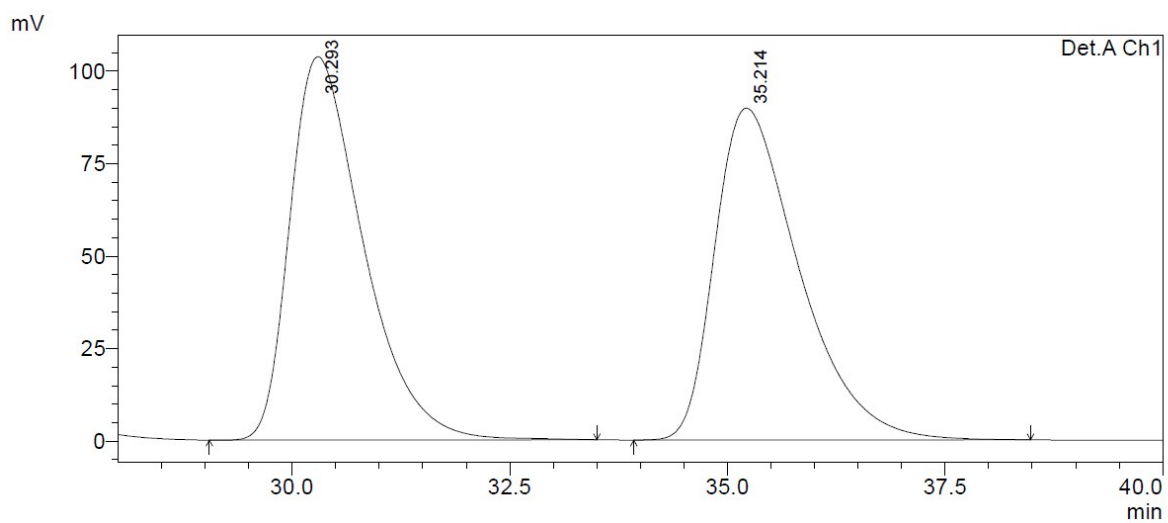

Detector A Ch1 254nm

| Peak# | Ret. Time | Area     | Height | Area %  | Height % |
|-------|-----------|----------|--------|---------|----------|
| 1     | 30.293    | 6076919  | 103628 | 50.047  | 53.600   |
| 2     | 35.214    | 6065490  | 89709  | 49.953  | 46.400   |
| Total |           | 12142409 | 193337 | 100.000 | 100.000  |

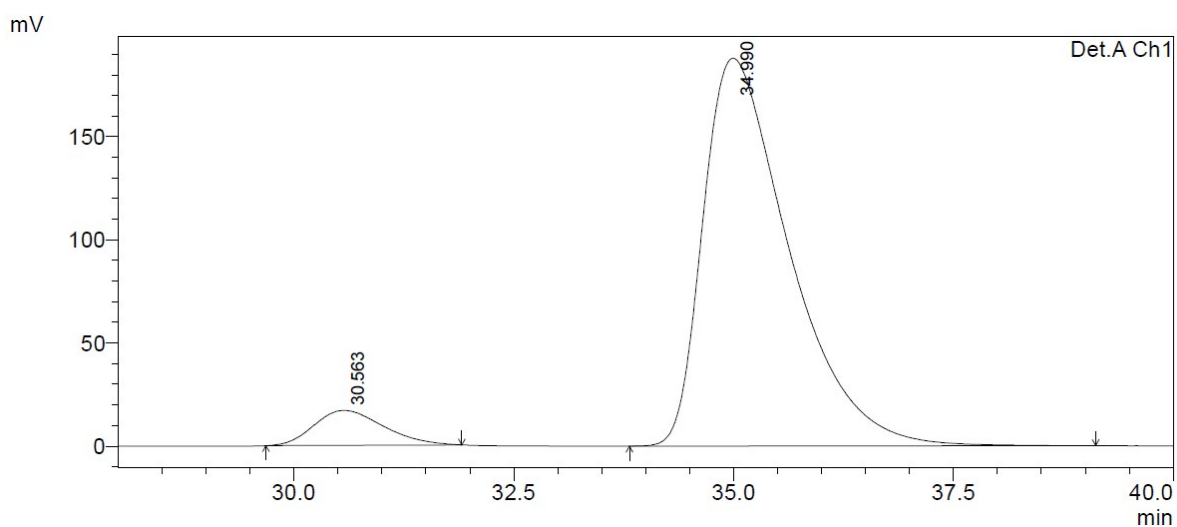

Detector A Ch1 254nm

| Peak# | Ret. Time | Area     | Height | Area %  | Height % |
|-------|-----------|----------|--------|---------|----------|
| 1     | 30.563    | 929990   | 16933  | 6.774   | 8.266    |
| 2     | 34.990    | 12799086 | 187920 | 93.226  | 91.734   |
| Total |           | 13729076 | 204853 | 100.000 | 100.000  |

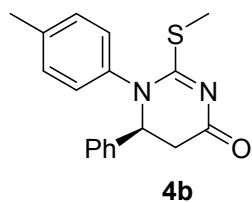

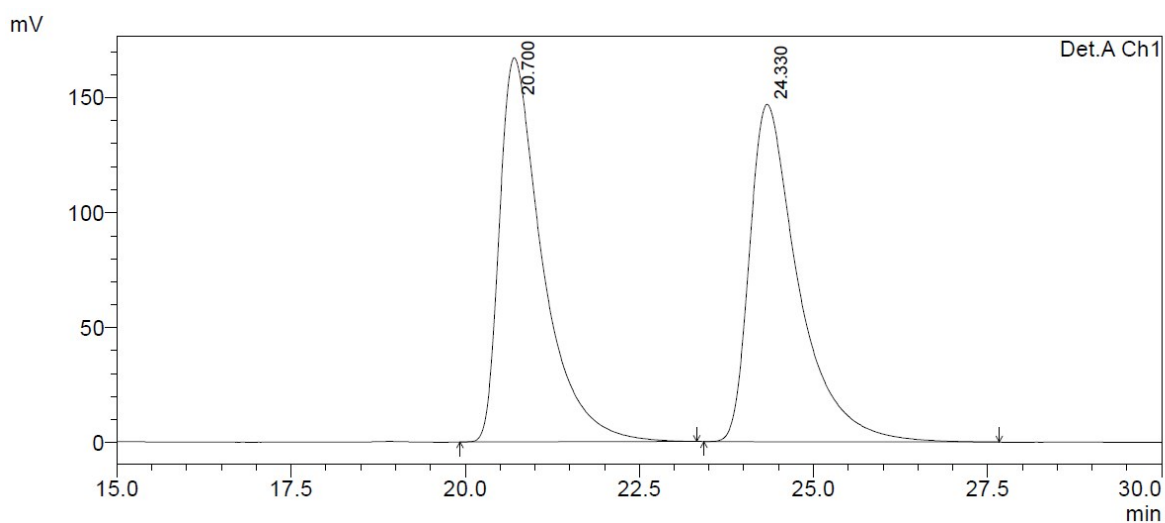

Detector A Ch1 254nm

| Peak# | Ret. Time | Area     | Height | Area %  | Height % |
|-------|-----------|----------|--------|---------|----------|
| 1     | 20.700    | 7145525  | 166999 | 49.940  | 53.237   |
| 2     | 24.330    | 7162760  | 146690 | 50.060  | 46.763   |
| Total |           | 14308285 | 313689 | 100.000 | 100.000  |

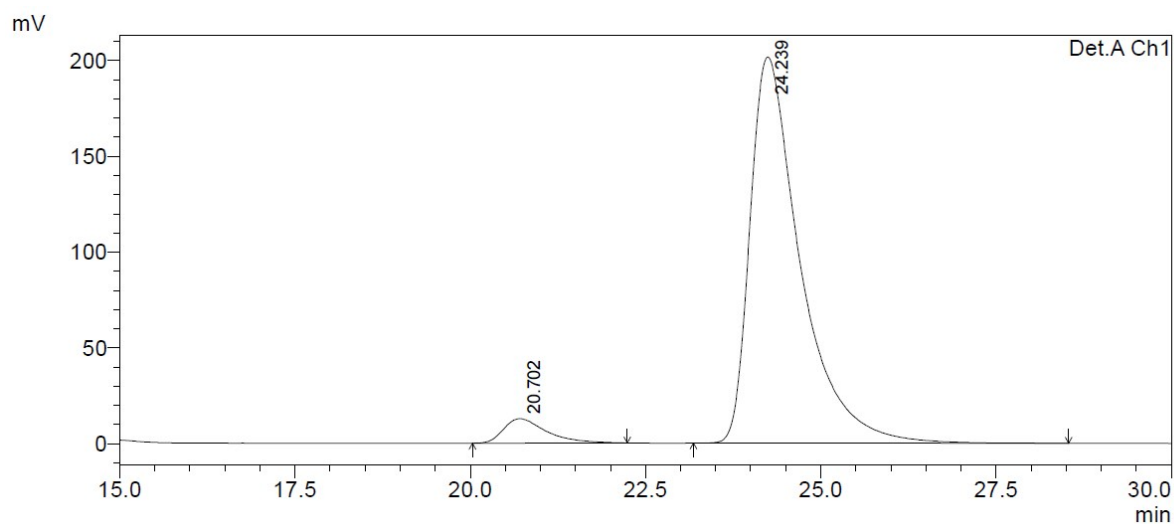

Detector A Ch1 254nm

| Peak# | Ret. Time | Area     | Height | Area %  | Height % |
|-------|-----------|----------|--------|---------|----------|
| 1     | 20.702    | 536472   | 12730  | 5.079   | 5.941    |
| 2     | 24.239    | 10027068 | 201523 | 94.921  | 94.059   |
| Total |           | 10563541 | 214253 | 100.000 | 100.000  |

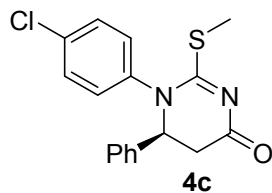

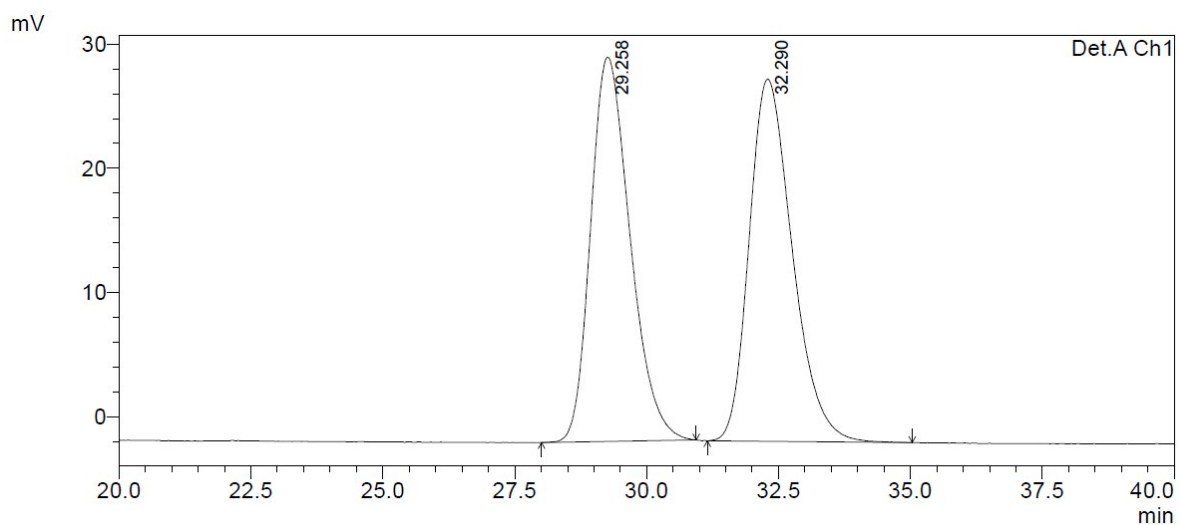

Detector A Ch1 254nm

| Peak# | Ret. Time | Area    | Height | Area %  | Height % |
|-------|-----------|---------|--------|---------|----------|
| 1     | 29.258    | 1609588 | 30924  | 49.247  | 51.474   |
| 2     | 32.290    | 1658780 | 29153  | 50.753  | 48.526   |
| Total |           | 3268368 | 60077  | 100.000 | 100.000  |

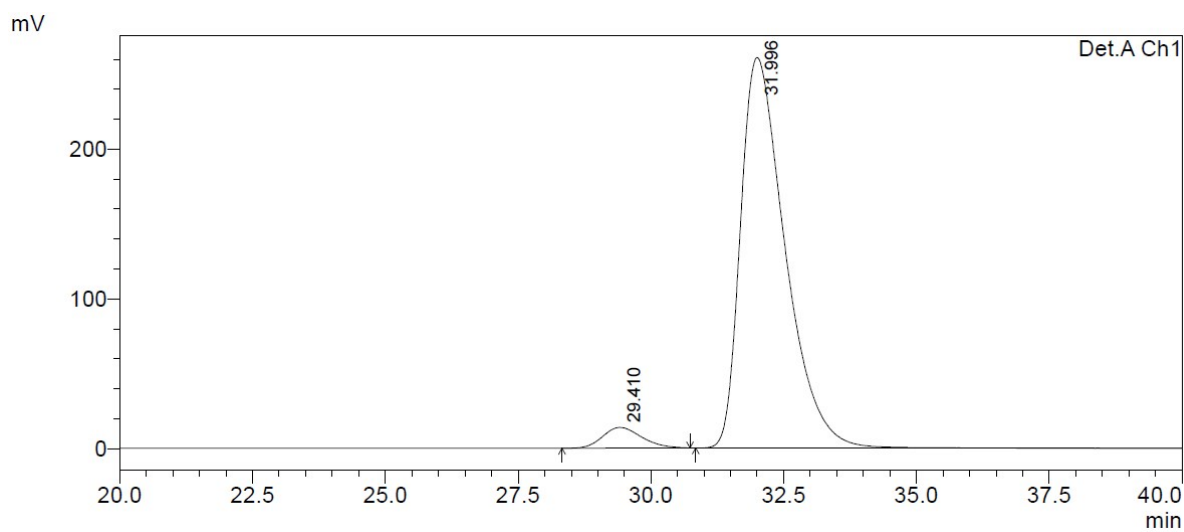

Detector A Ch1 254nm

| Peak# | Ret. Time | Area     | Height | Area %  | Height % |
|-------|-----------|----------|--------|---------|----------|
| 1     | 29.410    | 697836   | 13766  | 4.384   | 5.017    |
| 2     | 31.996    | 15219025 | 260634 | 95.616  | 94.983   |
| Total |           | 15916861 | 274401 | 100.000 | 100.000  |

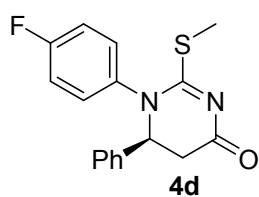

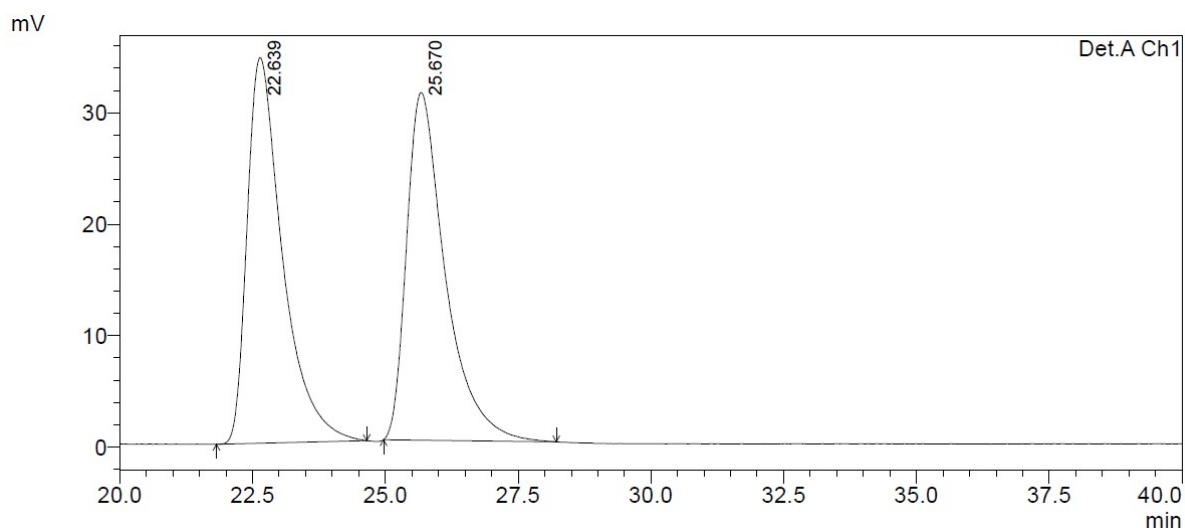

Detector A Ch1 254nm

| Peak# | Ret. Time | Area    | Height | Area %  | Height % |
|-------|-----------|---------|--------|---------|----------|
| 1     | 22.639    | 1604405 | 34588  | 50.371  | 52.598   |
| 2     | 25.670    | 1580780 | 31171  | 49.629  | 47.402   |
| Total |           | 3185185 | 65759  | 100.000 | 100.000  |

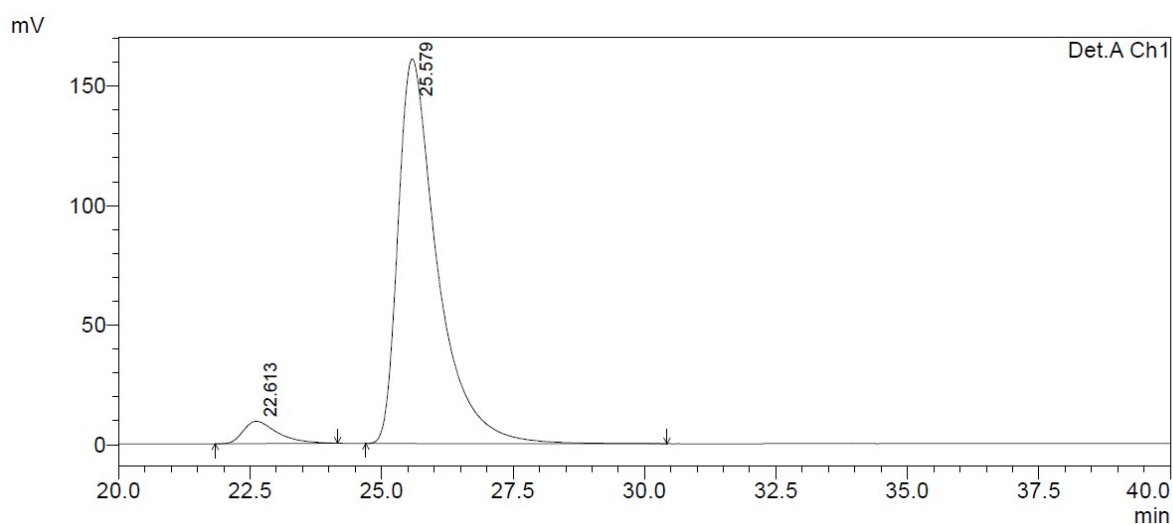

Detector A Ch1 254nm

| Peak# | Ret. Time | Area    | Height | Area %  | Height % |
|-------|-----------|---------|--------|---------|----------|
| 1     | 22.613    | 421049  | 9332   | 4.808   | 5.486    |
| 2     | 25.579    | 8336471 | 160770 | 95.192  | 94.514   |
| Total |           | 8757520 | 170102 | 100.000 | 100.000  |

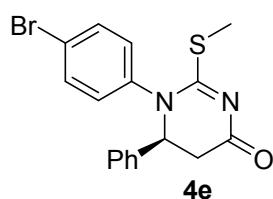

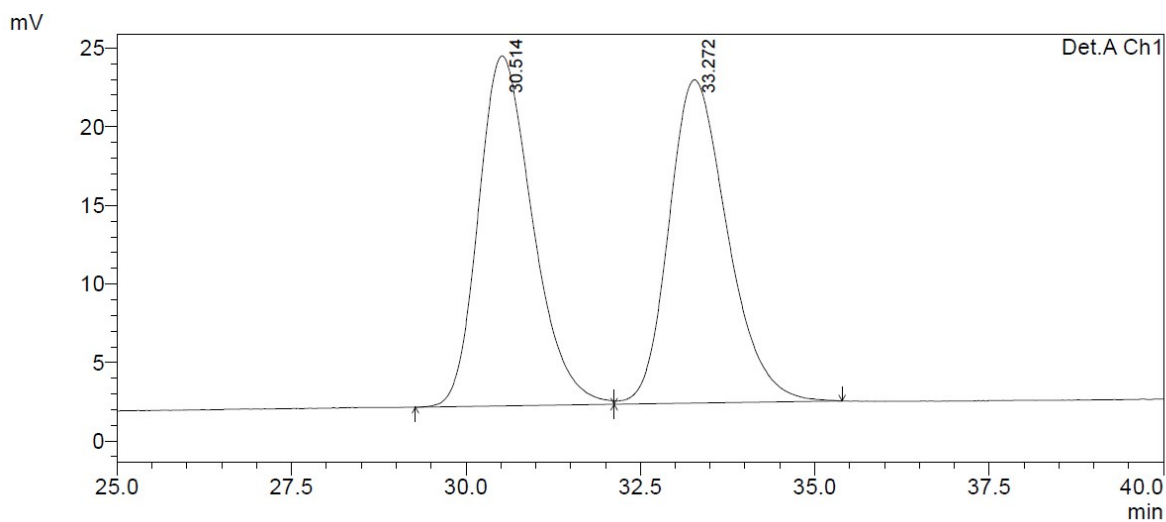

Detector A Ch1 254nm

| Peak# | Ret. Time | Area    | Height | Area %  | Height % |
|-------|-----------|---------|--------|---------|----------|
| 1     | 30.514    | 1203855 | 22264  | 50.038  | 51.984   |
| 2     | 33.272    | 1202037 | 20565  | 49.962  | 48.016   |
| Total |           | 2405891 | 42829  | 100.000 | 100.000  |

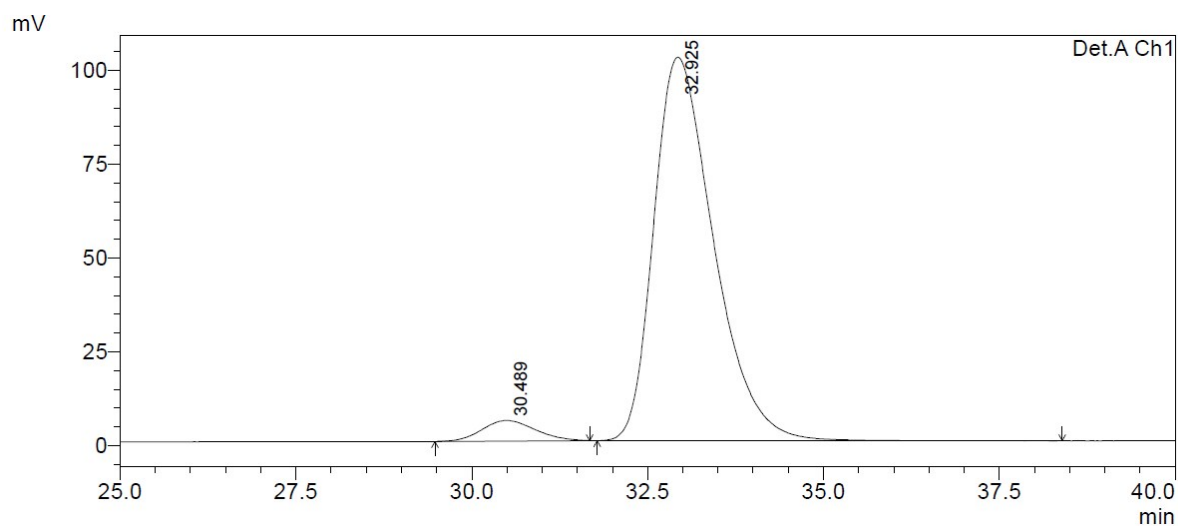

Detector A Ch1 254nm

| Peak# | Ret. Time | Area    | Height | Area %  | Height % |
|-------|-----------|---------|--------|---------|----------|
| 1     | 30.489    | 287168  | 5488   | 4.533   | 5.094    |
| 2     | 32.925    | 6048395 | 102260 | 95.467  | 94.906   |
| Total |           | 6335562 | 107749 | 100.000 | 100.000  |

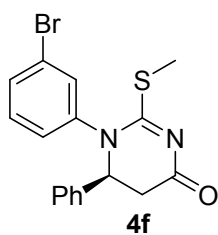

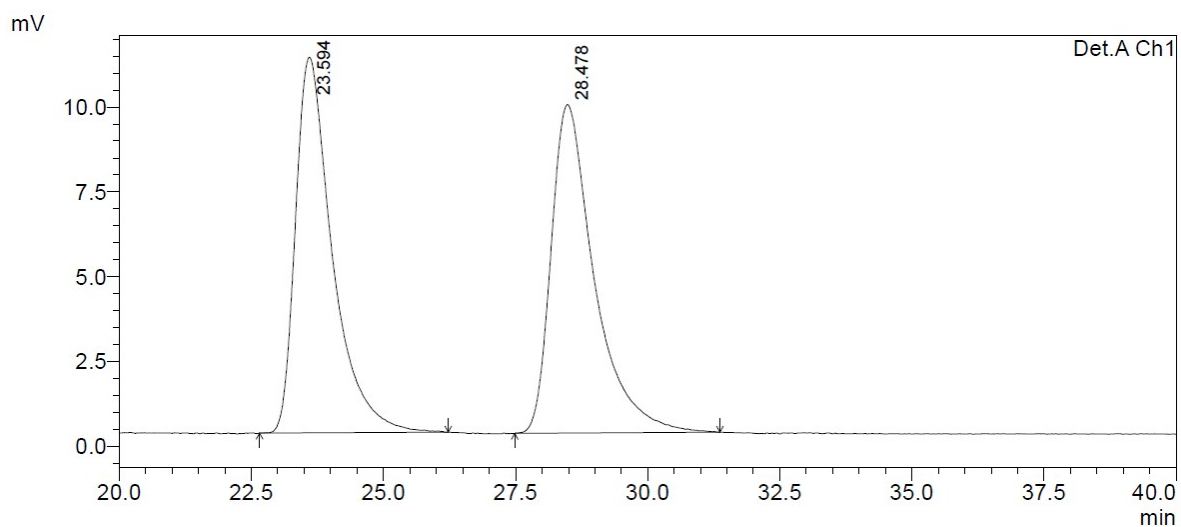

Detector A Ch1 254nm

| Peak# | Ret. Time | Area    | Height | Area %  | Height % |
|-------|-----------|---------|--------|---------|----------|
| 1     | 23.594    | 536143  | 11074  | 49.368  | 53.339   |
| 2     | 28.478    | 549863  | 9687   | 50.632  | 46.661   |
| Total |           | 1086006 | 20761  | 100.000 | 100.000  |

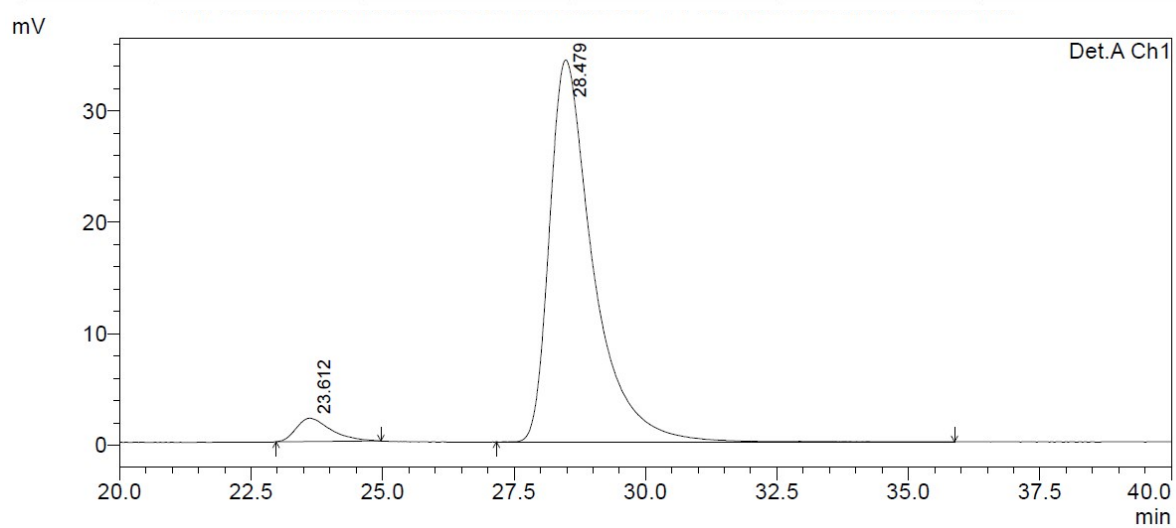

Detector A Ch1 254nm

| Peak# | Ret. Time | Area    | Height | Area %  | Height % |
|-------|-----------|---------|--------|---------|----------|
| 1     | 23.612    | 95823   | 2085   | 4.630   | 5.735    |
| 2     | 28.479    | 1973984 | 34272  | 95.370  | 94.265   |
| Total |           | 2069806 | 36357  | 100.000 | 100.000  |

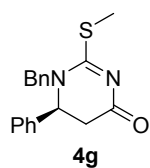

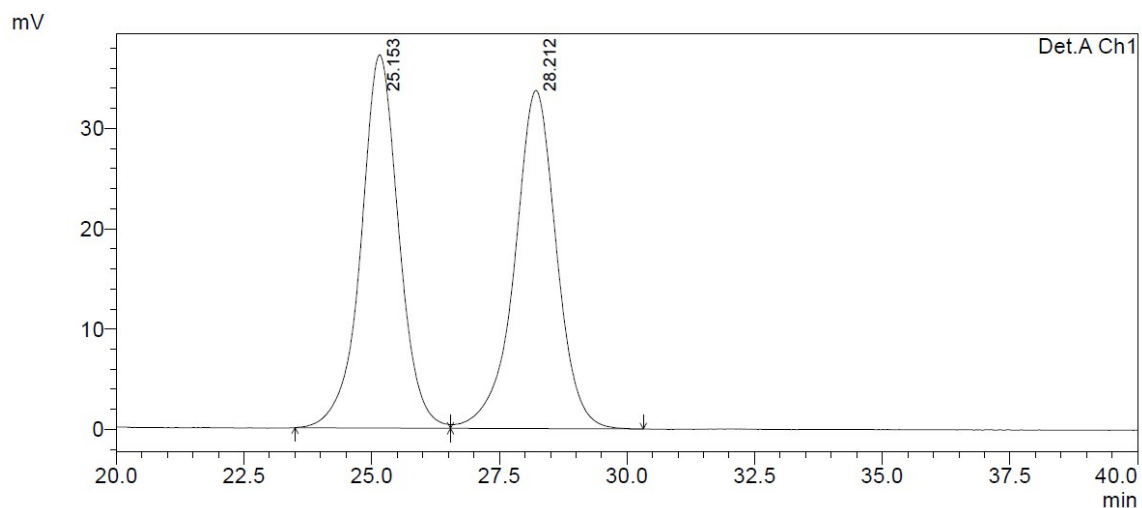

Detector A Ch1 254nm

| Peak# | Ret. Time | Area    | Height | Area %  | Height % |
|-------|-----------|---------|--------|---------|----------|
| 1     | 25.153    | 1916128 | 37179  | 49.878  | 52.459   |
| 2     | 28.212    | 1925496 | 33693  | 50.122  | 47.541   |
| Total |           | 3841624 | 70872  | 100.000 | 100.000  |

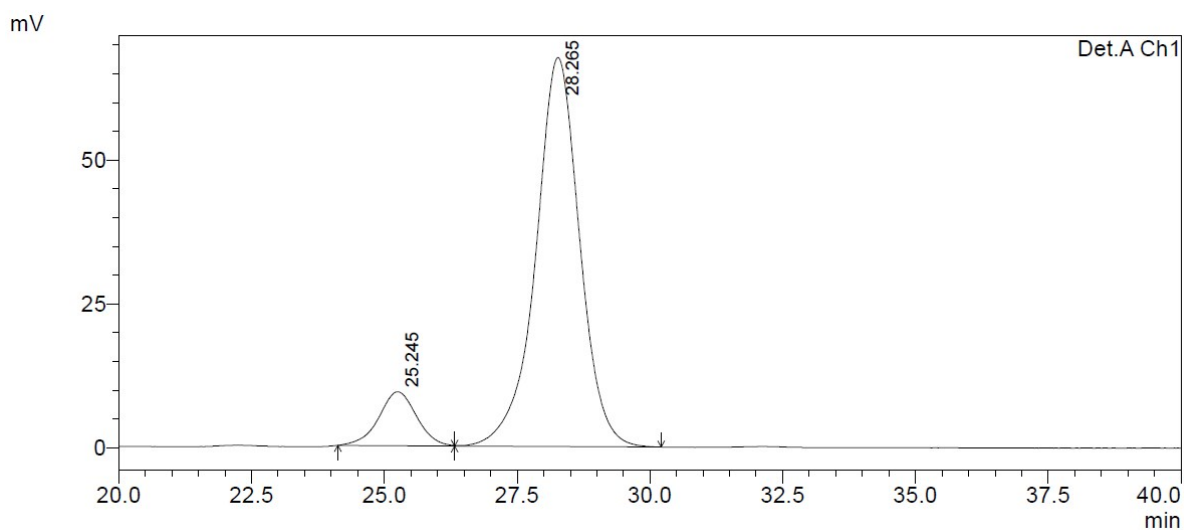

Detector A Ch1 254nm

| Peak# | Ret. Time | Area    | Height | Area %  | Height % |
|-------|-----------|---------|--------|---------|----------|
| 1     | 25.245    | 462687  | 9368   | 10.629  | 12.169   |
| 2     | 28.265    | 3890385 | 67611  | 89.371  | 87.831   |
| Total |           | 4353072 | 76979  | 100.000 | 100.000  |

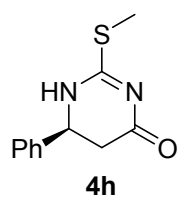



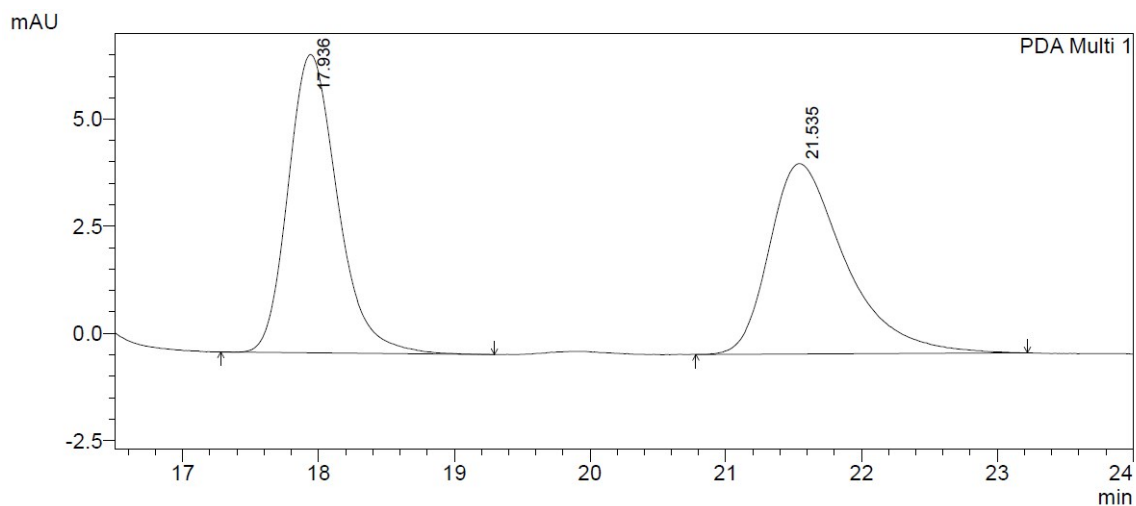

PDA Ch1 254nm 4nm

| Peak# | Ret. Time | Area   | Height | Area %  | Height % |
|-------|-----------|--------|--------|---------|----------|
| 1     | 17.936    | 176492 | 6964   | 50.566  | 61.060   |
| 2     | 21.535    | 172543 | 4441   | 49.434  | 38.940   |
| Total |           | 349035 | 11405  | 100.000 | 100.000  |

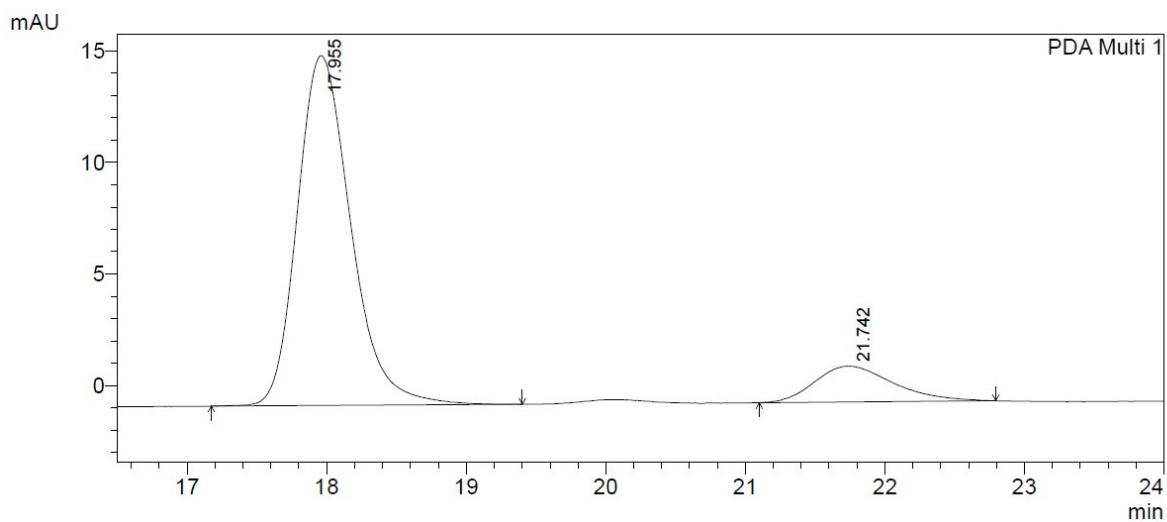

PDA Ch1 254nm 4nm

| Peak# | Ret. Time | Area   | Height | Area %  | Height % |
|-------|-----------|--------|--------|---------|----------|
| 1     | 17.955    | 417201 | 15672  | 86.954  | 90.713   |
| 2     | 21.742    | 62595  | 1604   | 13.046  | 9.287    |
| Total |           | 479796 | 17277  | 100.000 | 100.000  |

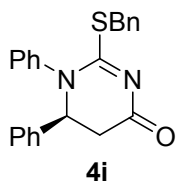

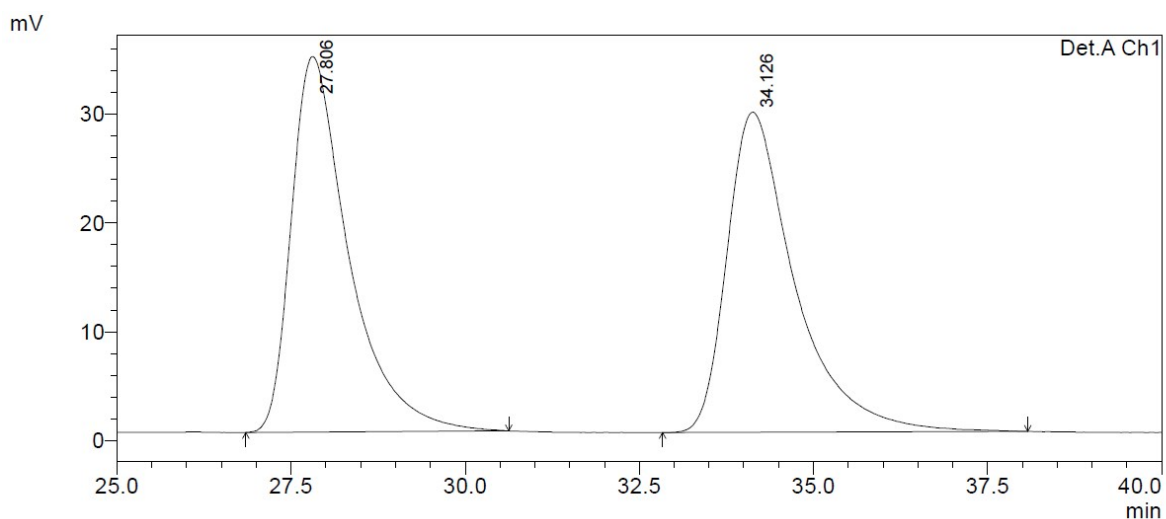

Detector A Ch1 254nm

| Peak# | Ret. Time | Area    | Height | Area %  | Height % |
|-------|-----------|---------|--------|---------|----------|
| 1     | 27.806    | 1978587 | 34515  | 49.763  | 53.974   |
| 2     | 34.126    | 1997453 | 29432  | 50.237  | 46.026   |
| Total |           | 3976039 | 63947  | 100.000 | 100.000  |

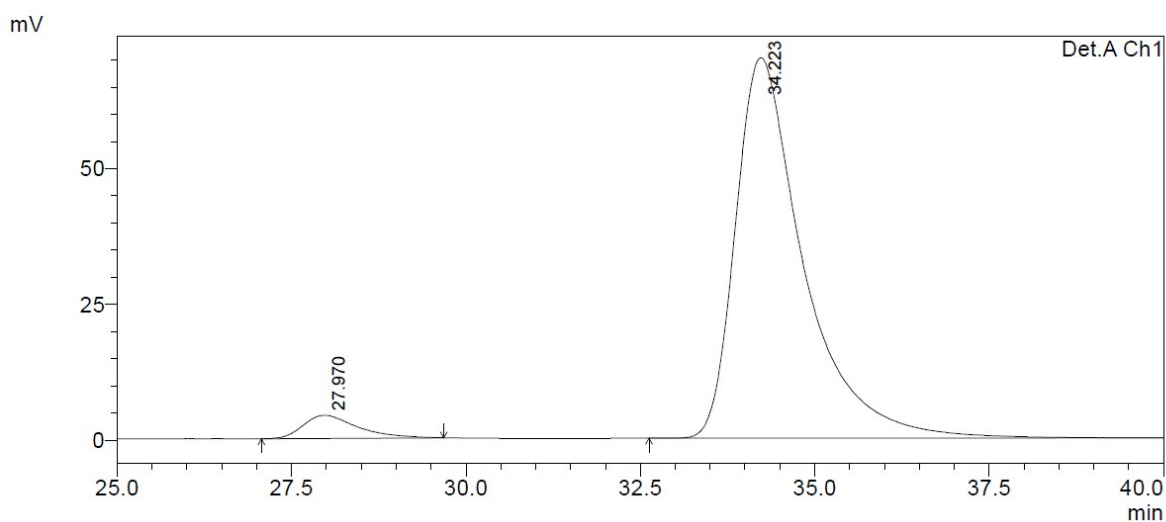

Detector A Ch1 254nm

| Peak# | Ret. Time | Area    | Height | Area %  | Height % |
|-------|-----------|---------|--------|---------|----------|
| 1     | 27.970    | 228949  | 4257   | 4.597   | 5.730    |
| 2     | 34.223    | 4751820 | 70049  | 95.403  | 94.270   |
| Total |           | 4980769 | 74306  | 100.000 | 100.000  |

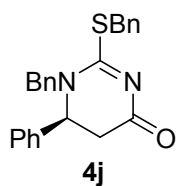

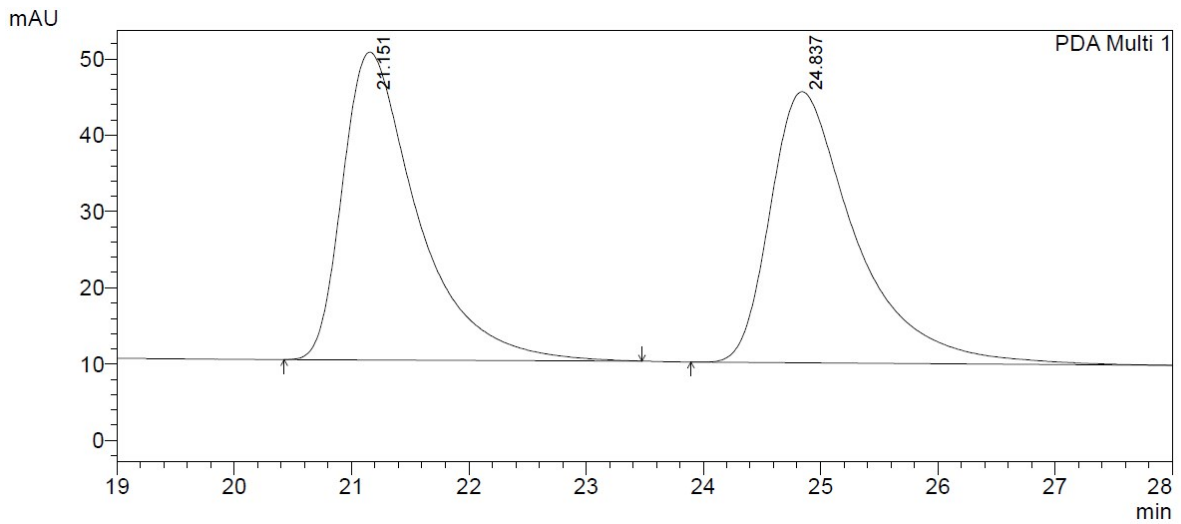

PDA Ch1 254nm 4nm

| Peak# | Ret. Time | Area    | Height | Area %  | Height % |
|-------|-----------|---------|--------|---------|----------|
| 1     | 21.151    | 1794962 | 40335  | 49.857  | 53.154   |
| 2     | 24.837    | 1805252 | 35548  | 50.143  | 46.846   |
| Total |           | 3600213 | 75883  | 100.000 | 100.000  |

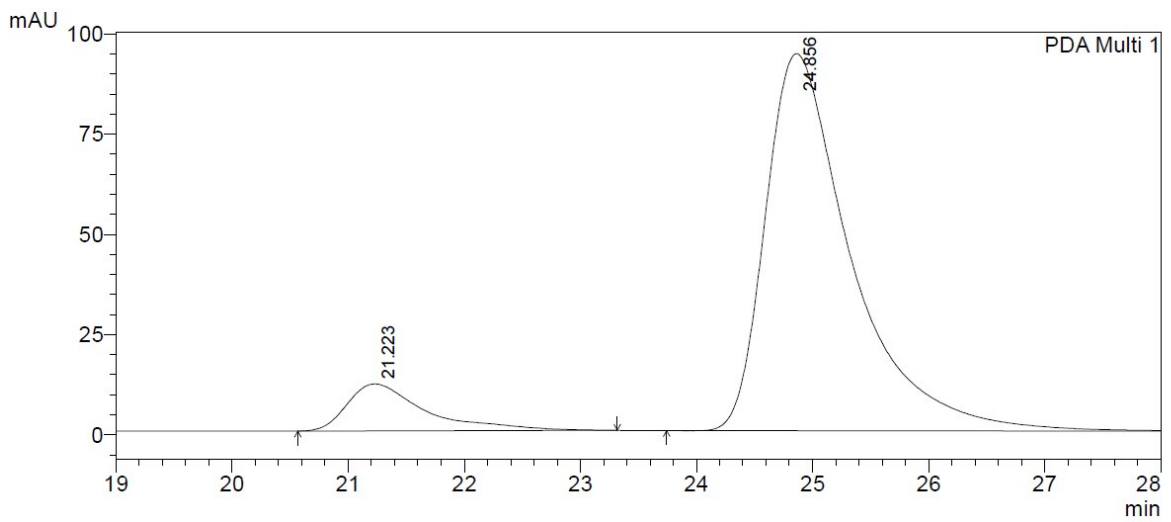

PDA Ch1 254nm 4nm

| Peak# | Ret. Time | Area    | Height | Area %  | Height % |
|-------|-----------|---------|--------|---------|----------|
| 1     | 21.223    | 548887  | 11723  | 10.211  | 11.086   |
| 2     | 24.856    | 4826713 | 94030  | 89.789  | 88.914   |
| Total |           | 5375600 | 105753 | 100.000 | 100.000  |

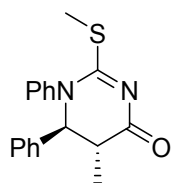

**5a**

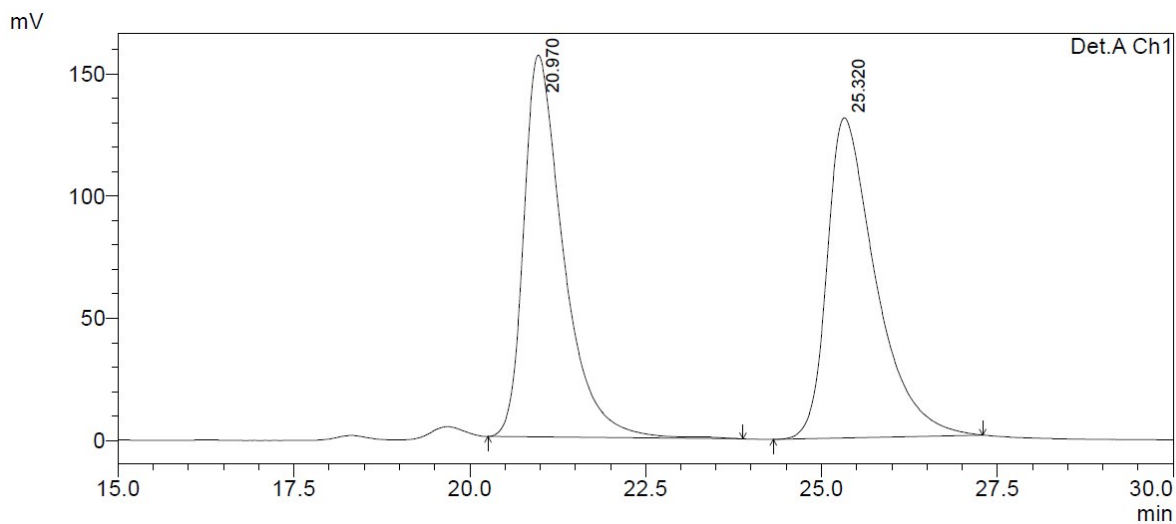

Detector A Ch1 254nm

| Peak# | Ret. Time | Area     | Height | Area %  | Height % |
|-------|-----------|----------|--------|---------|----------|
| 1     | 20.970    | 6123344  | 156132 | 49.306  | 54.393   |
| 2     | 25.320    | 6295640  | 130911 | 50.694  | 45.607   |
| Total |           | 12418983 | 287043 | 100.000 | 100.000  |

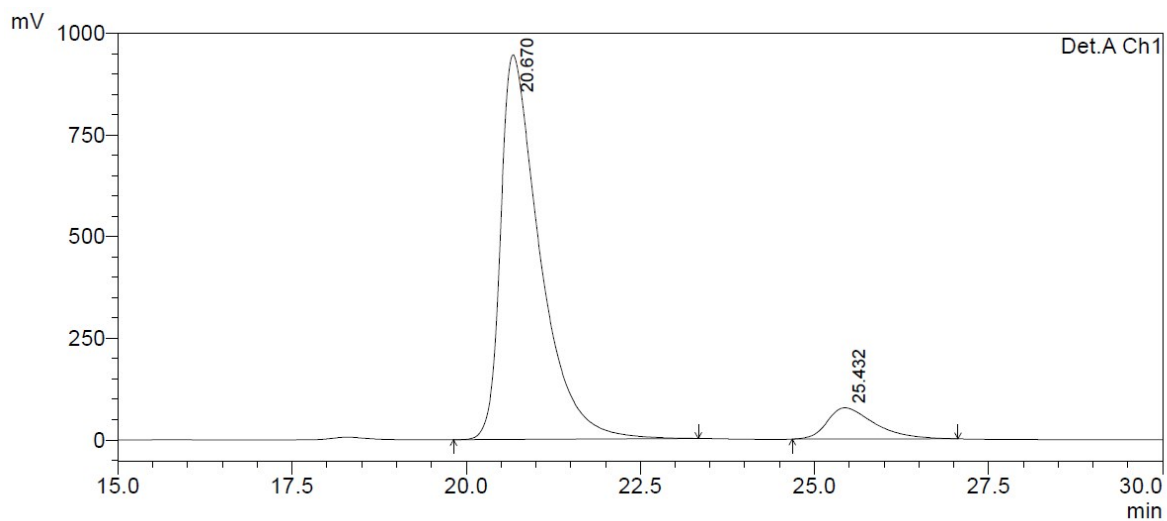

Detector A Ch1 254nm

| Peak# | Ret. Time | Area     | Height  | Area %  | Height % |
|-------|-----------|----------|---------|---------|----------|
| 1     | 20.670    | 37014319 | 945665  | 91.097  | 92.495   |
| 2     | 25.432    | 3617568  | 76732   | 8.903   | 7.505    |
| Total |           | 40631887 | 1022397 | 100.000 | 100.000  |

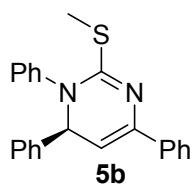

**5b**

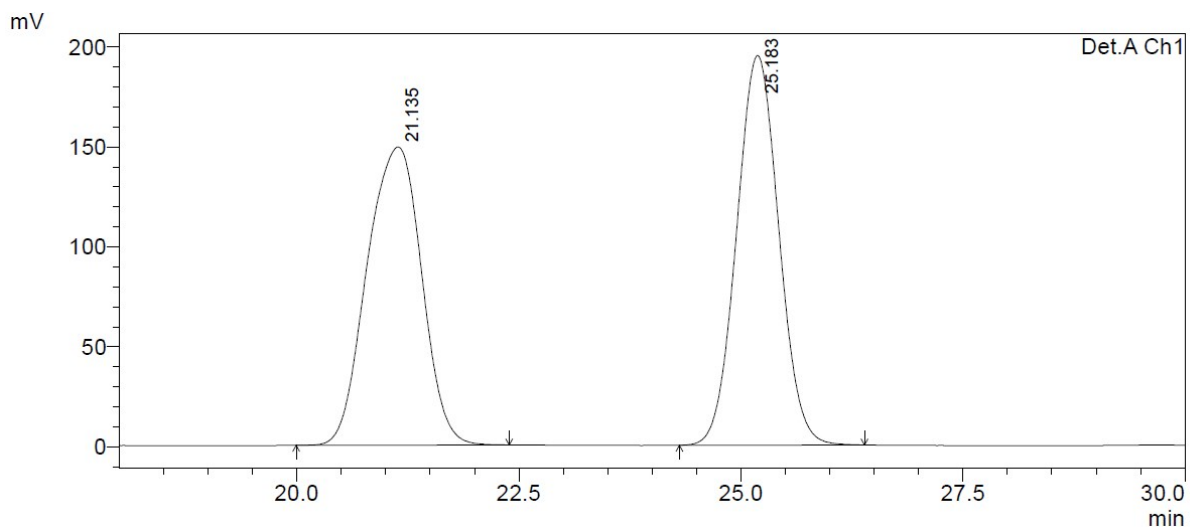

Detector A Ch1 254nm

| Peak# | Ret. Time | Area     | Height | Area %  | Height % |
|-------|-----------|----------|--------|---------|----------|
| 1     | 21.135    | 6388276  | 149144 | 49.771  | 43.353   |
| 2     | 25.183    | 6447024  | 194878 | 50.229  | 56.647   |
| Total |           | 12835300 | 344022 | 100.000 | 100.000  |

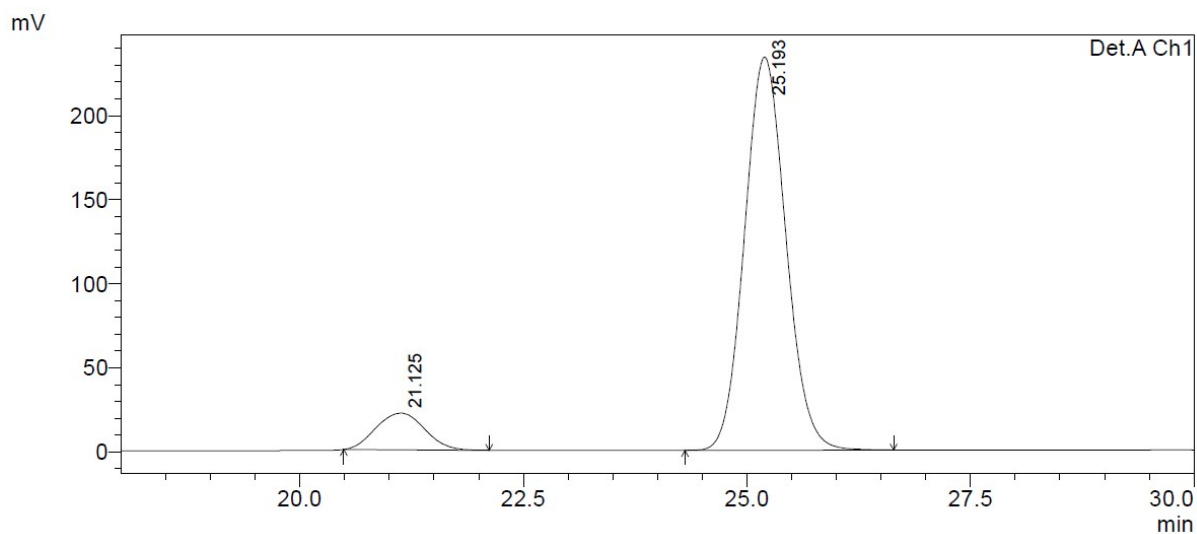

Detector A Ch1 254nm

| Peak# | Ret. Time | Area    | Height | Area %  | Height % |
|-------|-----------|---------|--------|---------|----------|
| 1     | 21.125    | 824440  | 21794  | 9.877   | 8.526    |
| 2     | 25.193    | 7522766 | 233841 | 90.123  | 91.474   |
| Total |           | 8347207 | 255636 | 100.000 | 100.000  |

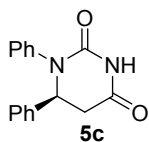

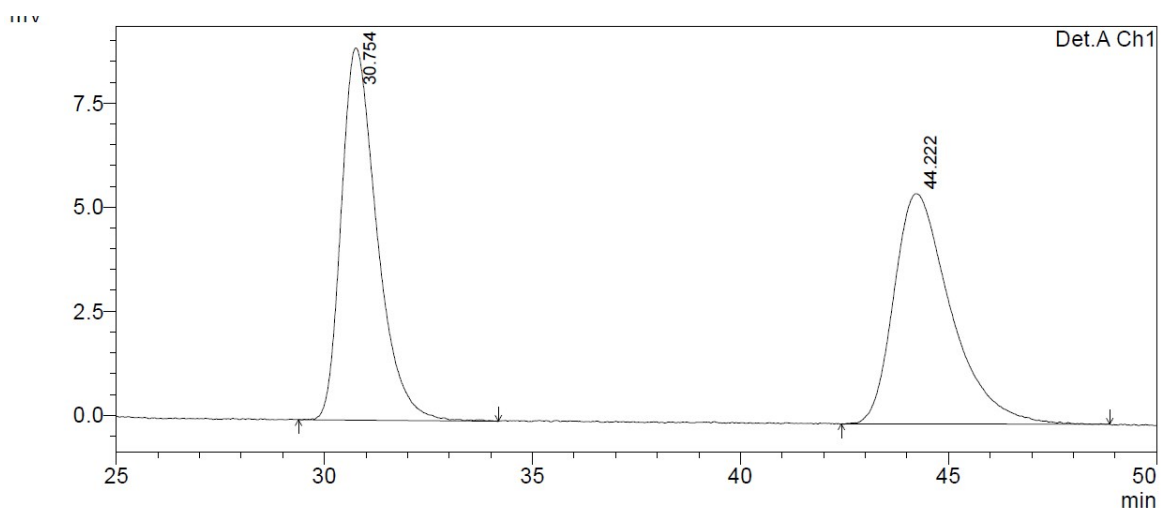

Detector A Ch1 254nm

| Peak# | Ret. Time | Area    | Height | Area %  | Height % |
|-------|-----------|---------|--------|---------|----------|
| 1     | 30.754    | 533775  | 8937   | 50.353  | 61.750   |
| 2     | 44.222    | 526295  | 5536   | 49.647  | 38.250   |
| Total |           | 1060070 | 14473  | 100.000 | 100.000  |

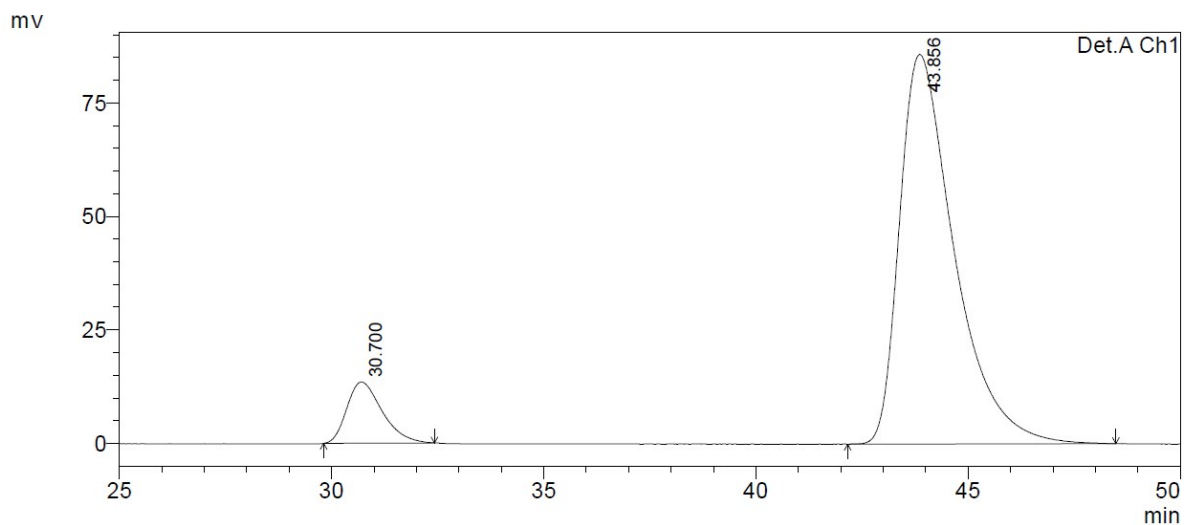

Detector A Ch1 254nm

| Peak# | Ret. Time | Area    | Height | Area %  | Height % |
|-------|-----------|---------|--------|---------|----------|
| 1     | 30.700    | 778357  | 13482  | 9.195   | 13.585   |
| 2     | 43.856    | 7686495 | 85761  | 90.805  | 86.415   |
| Total |           | 8464852 | 99243  | 100.000 | 100.000  |

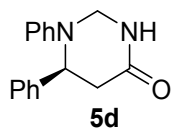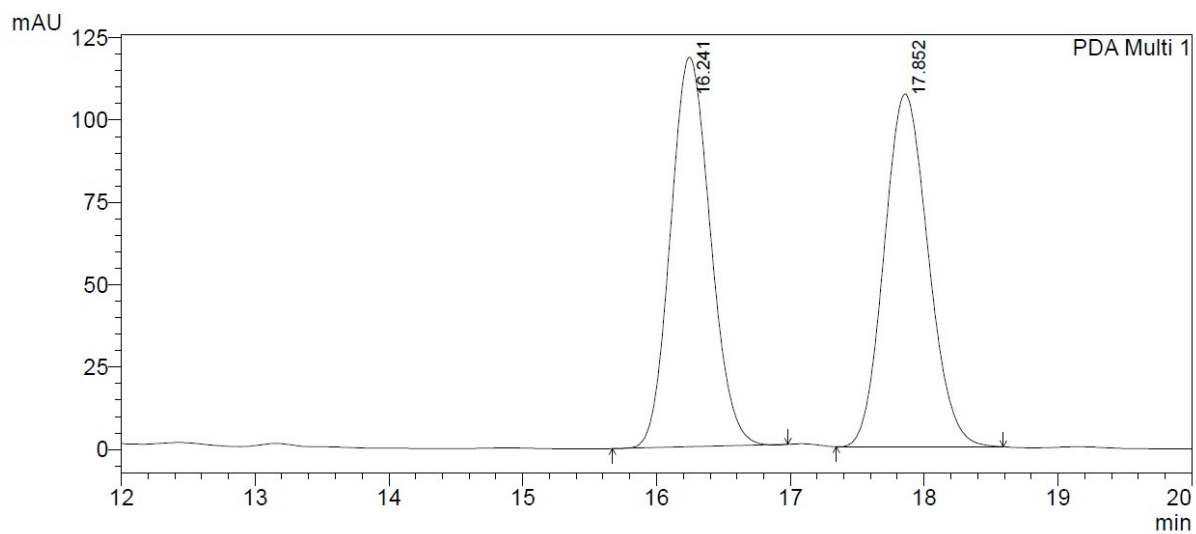

PDA Ch1 254nm 4nm

| Peak# | Ret. Time | Area    | Height | Area %  | Height % |
|-------|-----------|---------|--------|---------|----------|
| 1     | 16.241    | 2452299 | 118323 | 49.967  | 52.481   |
| 2     | 17.852    | 2455508 | 107134 | 50.033  | 47.519   |
| Total |           | 4907807 | 225457 | 100.000 | 100.000  |

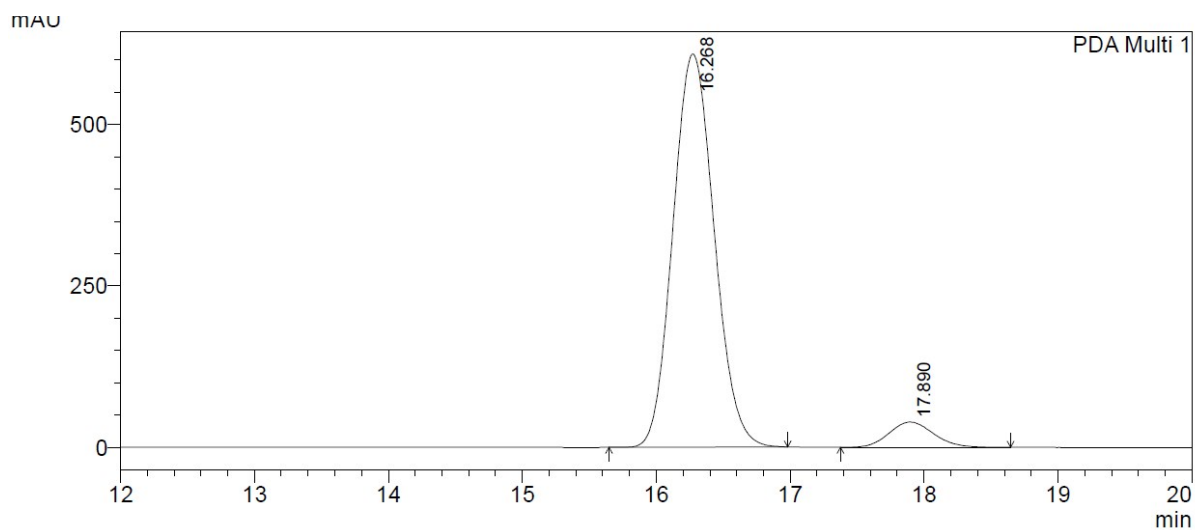

PDA Ch1 254nm 4nm

| Peak# | Ret. Time | Area     | Height | Area %  | Height % |
|-------|-----------|----------|--------|---------|----------|
| 1     | 16.268    | 13048788 | 608549 | 93.537  | 93.965   |
| 2     | 17.890    | 901634   | 39082  | 6.463   | 6.035    |
| Total |           | 13950421 | 647631 | 100.000 | 100.000  |
